# Supplementary material for: Offering fragile X syndrome carrier screening: a prospective mixed-methods observational study comparing carrier screening of pregnant and non-pregnant women in the general population
Source: PubMed Central journal article supplement — BMJ Open. 2013 Sep 7;3(9):e003660. doi: 10.1136/bmjopen-2013-003660 (PMC3773647; doi:10.1136/bmjopen-2013-003660), 2013-09-07
Supplement: bmjopen-2013-003660.draft_revisions.pdf [file bmjopen-2013-003660.draft_revisions.pdf]

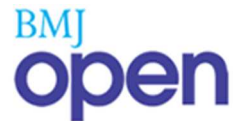

**Offering fragile X syndrome carrier screening: a prospective mixed-methods observational study comparing carrier screening of pregnant and non-pregnant women in the general population**

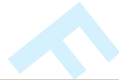

|                                 |                                                                                                                                                                                                                                                                                                                                                                                                                                                                                                                                                                                                                                                                                                                                                                                                                                                                                                                                                                                                                                                                                                                                                                                                                                                                                                                                                                                                                                                                                                                                                                                               |
|---------------------------------|-----------------------------------------------------------------------------------------------------------------------------------------------------------------------------------------------------------------------------------------------------------------------------------------------------------------------------------------------------------------------------------------------------------------------------------------------------------------------------------------------------------------------------------------------------------------------------------------------------------------------------------------------------------------------------------------------------------------------------------------------------------------------------------------------------------------------------------------------------------------------------------------------------------------------------------------------------------------------------------------------------------------------------------------------------------------------------------------------------------------------------------------------------------------------------------------------------------------------------------------------------------------------------------------------------------------------------------------------------------------------------------------------------------------------------------------------------------------------------------------------------------------------------------------------------------------------------------------------|
| Journal:                        | <i>BMJ Open</i>                                                                                                                                                                                                                                                                                                                                                                                                                                                                                                                                                                                                                                                                                                                                                                                                                                                                                                                                                                                                                                                                                                                                                                                                                                                                                                                                                                                                                                                                                                                                                                               |
| Manuscript ID:                  | bmjopen-2013-003660                                                                                                                                                                                                                                                                                                                                                                                                                                                                                                                                                                                                                                                                                                                                                                                                                                                                                                                                                                                                                                                                                                                                                                                                                                                                                                                                                                                                                                                                                                                                                                           |
| Article Type:                   | Protocol                                                                                                                                                                                                                                                                                                                                                                                                                                                                                                                                                                                                                                                                                                                                                                                                                                                                                                                                                                                                                                                                                                                                                                                                                                                                                                                                                                                                                                                                                                                                                                                      |
| Date Submitted by the Author:   | 25-Jul-2013                                                                                                                                                                                                                                                                                                                                                                                                                                                                                                                                                                                                                                                                                                                                                                                                                                                                                                                                                                                                                                                                                                                                                                                                                                                                                                                                                                                                                                                                                                                                                                                   |
| Complete List of Authors:       | <p>Martyn, Melissa; Murdoch Childrens Research Institute, Genetics Education and Health Research<br/>           Anderson, Vivki; Murdoch Childrens Research Institute, Archibald, Alison; Victorian Clinical Genetics Service, Maternal Serum Screening<br/>           Carter, Rob; Deakin University, Faculty of Health<br/>           Cohen, Jonathan; Fragile X Alliance Clinic, ; Monash University, Centre for Developmental Disability Health Victoria<br/>           Delatycki, Martin; Austin Health, ; Murdoch Childrens Research Institute, Donath, Susan; Murdoch Childrens Research Institute, Clinical Epidemiology and Biostatistics Unit; University of Melbourne, Department of Paediatrics<br/>           Emery, Jon; University of Western Australia, School of Primary Aboriginal and Rural Health Care; University of Melbourne, General Practice and Primary Care Academic Centre<br/>           Halliday, Jane; Murdoch Childrens Research Institute, ; University of Melbourne, Department of Paediatrics<br/>           Hill, Melissa; Great Ormond Street Hospital for Children, Sheffield, Les; GenesFX Health Pty Ltd, ; Victorian Clinical Genetics Services,<br/>           Slater, Howard; Murdoch Childrens Research Institute, Cyto-molecular Diagnostics Research<br/>           Tassone, Flora; University of California at Davis, Department of Biochemistry and Molecular Medicine; University of California Davis Medical Center, MIND Institute<br/>           Younie, Sandra; Deakin University, Faculty of Health<br/>           Metcalfe, Sylvia</p> |
| <b>Primary Subject Heading</b>: | Genetics and genomics                                                                                                                                                                                                                                                                                                                                                                                                                                                                                                                                                                                                                                                                                                                                                                                                                                                                                                                                                                                                                                                                                                                                                                                                                                                                                                                                                                                                                                                                                                                                                                         |
| Secondary Subject Heading:      | Public health                                                                                                                                                                                                                                                                                                                                                                                                                                                                                                                                                                                                                                                                                                                                                                                                                                                                                                                                                                                                                                                                                                                                                                                                                                                                                                                                                                                                                                                                                                                                                                                 |
| Keywords:                       | GENETICS, PUBLIC HEALTH, Health policy < HEALTH SERVICES ADMINISTRATION & MANAGEMENT                                                                                                                                                                                                                                                                                                                                                                                                                                                                                                                                                                                                                                                                                                                                                                                                                                                                                                                                                                                                                                                                                                                                                                                                                                                                                                                                                                                                                                                                                                          |
|                                 |                                                                                                                                                                                                                                                                                                                                                                                                                                                                                                                                                                                                                                                                                                                                                                                                                                                                                                                                                                                                                                                                                                                                                                                                                                                                                                                                                                                                                                                                                                                                                                                               |

1  
2  
3  
4  
5  
6  
7  
8  
9  
10  
11  
12  
13  
14  
15  
16  
17  
18  
19  
20  
21  
22  
23  
24  
25  
26  
27  
28  
29  
30  
31  
32  
33  
34  
35  
36  
37  
38  
39  
40  
41  
42  
43  
44  
45  
46  
47  
48  
49  
50  
51  
52  
53  
54  
55  
56  
57  
58  
59  
60

SCHOLARONE™  
Manuscripts

For peer review only

## STROBE Statement—checklist of items that should be included in reports of observational studies

|                           | Item No | Recommendation                                                                                                                                                                                                                                                                                                                                                                                                                                                         | Check              |
|---------------------------|---------|------------------------------------------------------------------------------------------------------------------------------------------------------------------------------------------------------------------------------------------------------------------------------------------------------------------------------------------------------------------------------------------------------------------------------------------------------------------------|--------------------|
| <b>Title and abstract</b> | 1       | (a) Indicate the study's design with a commonly used term in the title or the abstract                                                                                                                                                                                                                                                                                                                                                                                 | X                  |
|                           |         | (b) Provide in the abstract an informative and balanced summary of what was done and what was found                                                                                                                                                                                                                                                                                                                                                                    | X                  |
| <b>Introduction</b>       |         |                                                                                                                                                                                                                                                                                                                                                                                                                                                                        |                    |
| Background/rationale      | 2       | Explain the scientific background and rationale for the investigation being reported                                                                                                                                                                                                                                                                                                                                                                                   | X                  |
| Objectives                | 3       | State specific objectives, including any prespecified hypotheses                                                                                                                                                                                                                                                                                                                                                                                                       | X                  |
| <b>Methods</b>            |         |                                                                                                                                                                                                                                                                                                                                                                                                                                                                        |                    |
| Study design              | 4       | Present key elements of study design early in the paper                                                                                                                                                                                                                                                                                                                                                                                                                | X                  |
| Setting                   | 5       | Describe the setting, locations, and relevant dates, including periods of recruitment, exposure, follow-up, and data collection                                                                                                                                                                                                                                                                                                                                        | X                  |
| Participants              | 6       | (a) <i>Cohort study</i> —Give the eligibility criteria, and the sources and methods of selection of participants. Describe methods of follow-up<br><i>Case-control study</i> —Give the eligibility criteria, and the sources and methods of case ascertainment and control selection. Give the rationale for the choice of cases and controls<br><i>Cross-sectional study</i> —Give the eligibility criteria, and the sources and methods of selection of participants | X                  |
|                           |         | (b) <i>Cohort study</i> —For matched studies, give matching criteria and number of exposed and unexposed<br><i>Case-control study</i> —For matched studies, give matching criteria and the number of controls per case                                                                                                                                                                                                                                                 |                    |
| Variables                 | 7       | Clearly define all outcomes, exposures, predictors, potential confounders, and effect modifiers. Give diagnostic criteria, if applicable                                                                                                                                                                                                                                                                                                                               | X                  |
| Data sources/measurement  | 8*      | For each variable of interest, give sources of data and details of methods of assessment (measurement). Describe comparability of assessment methods if there is more than one group                                                                                                                                                                                                                                                                                   | X                  |
| Bias                      | 9       | Describe any efforts to address potential sources of bias                                                                                                                                                                                                                                                                                                                                                                                                              | X                  |
| Study size                | 10      | Explain how the study size was arrived at                                                                                                                                                                                                                                                                                                                                                                                                                              | X                  |
| Quantitative variables    | 11      | Explain how quantitative variables were handled in the analyses. If applicable, describe which groupings were chosen and why                                                                                                                                                                                                                                                                                                                                           | not yet applicable |
| Statistical methods       | 12      | (a) Describe all statistical methods, including those used to control for confounding                                                                                                                                                                                                                                                                                                                                                                                  | X                  |
|                           |         | (b) Describe any methods used to examine subgroups and interactions                                                                                                                                                                                                                                                                                                                                                                                                    | X                  |
|                           |         | (c) Explain how missing data were addressed                                                                                                                                                                                                                                                                                                                                                                                                                            | not yet applicable |
|                           |         | (d) <i>Cohort study</i> —If applicable, explain how loss to follow-up was addressed<br><i>Case-control study</i> —If applicable, explain how matching of cases and controls was addressed<br><i>Cross-sectional study</i> —If applicable, describe analytical methods                                                                                                                                                                                                  | not yet applicable |

|                          |     | taking account of sampling strategy                                                                                                                                                                          |                    |
|--------------------------|-----|--------------------------------------------------------------------------------------------------------------------------------------------------------------------------------------------------------------|--------------------|
|                          |     | (e) Describe any sensitivity analyses                                                                                                                                                                        | not yet applicable |
| <b>Results</b>           |     |                                                                                                                                                                                                              | <b>Check</b>       |
| Participants             | 13* | (a) Report numbers of individuals at each stage of study—eg numbers potentially eligible, examined for eligibility, confirmed eligible, included in the study, completing follow-up, and analysed            | not yet applicable |
|                          |     | (b) Give reasons for non-participation at each stage                                                                                                                                                         | not yet applicable |
|                          |     | (c) Consider use of a flow diagram                                                                                                                                                                           | X                  |
| Descriptive data         | 14* | (a) Give characteristics of study participants (eg demographic, clinical, social) and information on exposures and potential confounders                                                                     | not yet applicable |
|                          |     | (b) Indicate number of participants with missing data for each variable of interest                                                                                                                          | not yet applicable |
|                          |     | (c) <i>Cohort study</i> —Summarise follow-up time (eg, average and total amount)                                                                                                                             | not yet applicable |
| Outcome data             | 15* | <i>Cohort study</i> —Report numbers of outcome events or summary measures over time                                                                                                                          | not yet applicable |
|                          |     | <i>Case-control study</i> —Report numbers in each exposure category, or summary measures of exposure                                                                                                         |                    |
|                          |     | <i>Cross-sectional study</i> —Report numbers of outcome events or summary measures                                                                                                                           |                    |
| Main results             | 16  | (a) Give unadjusted estimates and, if applicable, confounder-adjusted estimates and their precision (eg, 95% confidence interval). Make clear which confounders were adjusted for and why they were included | not yet applicable |
|                          |     | (b) Report category boundaries when continuous variables were categorized                                                                                                                                    | not yet applicable |
|                          |     | (c) If relevant, consider translating estimates of relative risk into absolute risk for a meaningful time period                                                                                             | not yet applicable |
| Other analyses           | 17  | Report other analyses done—eg analyses of subgroups and interactions, and sensitivity analyses                                                                                                               | not yet applicable |
| <b>Discussion</b>        |     |                                                                                                                                                                                                              |                    |
| Key results              | 18  | Summarise key results with reference to study objectives                                                                                                                                                     | not yet applicable |
| Limitations              | 19  | Discuss limitations of the study, taking into account sources of potential bias or imprecision. Discuss both direction and magnitude of any potential bias                                                   | not yet applicable |
| Interpretation           | 20  | Give a cautious overall interpretation of results considering objectives, limitations, multiplicity of analyses, results from similar studies, and other relevant evidence                                   | not yet applicable |
| Generalisability         | 21  | Discuss the generalisability (external validity) of the study results                                                                                                                                        | not yet applicable |
| <b>Other information</b> |     |                                                                                                                                                                                                              |                    |
| Funding                  | 22  | Give the source of funding and the role of the funders for the present study and, if applicable, for the original study on which the present article is based                                                | X                  |

1  
2 \*Give information separately for cases and controls in case-control studies and, if applicable, for exposed and  
3 unexposed groups in cohort and cross-sectional studies.  
4

5  
6 **Note:** An Explanation and Elaboration article discusses each checklist item and gives methodological background and  
7 published examples of transparent reporting. The STROBE checklist is best used in conjunction with this article (freely  
8 available on the Web sites of PLoS Medicine at <http://www.plosmedicine.org/>, Annals of Internal Medicine at  
9 <http://www.annals.org/>, and Epidemiology at <http://www.epidem.com/>). Information on the STROBE Initiative is  
10 available at [www.strobe-statement.org](http://www.strobe-statement.org).  
11  
12  
13  
14  
15  
16  
17  
18  
19  
20  
21  
22  
23  
24  
25  
26  
27  
28  
29  
30  
31  
32  
33  
34  
35  
36  
37  
38  
39  
40  
41  
42  
43  
44  
45  
46  
47  
48  
49  
50  
51  
52  
53  
54  
55  
56  
57  
58  
59  
60

## TITLE PAGE

'Offering fragile X syndrome carrier screening: a prospective mixed-methods observational study comparing carrier screening of pregnant and non-pregnant women in the general population'

Short title: The fragile X syndrome carrier screening (FaXeS) study

Corresponding author:

Prof Sylvia Metcalfe  
Genetics Education and Health Research  
Murdoch Childrens Research Institute  
Royal Childrens Hospital  
Flemington Rd  
Parkville  
VIC 3052  
AUSTRALIA  
E: Sylvia.metcalfe@mcri.edu.au  
T: +61 3 8341 6309  
F: +61 3 8341 6207

Authors:

M Martyn<sup>1</sup>, V Anderson<sup>1,2,3</sup>, A Archibald<sup>1,3,4</sup>, R Carter<sup>5</sup>, J Cohen<sup>6</sup>, M Delatycki<sup>1,7</sup>, S Donath<sup>1,3</sup>, J Emery<sup>8</sup>, J Halliday<sup>1,3</sup>, M Hill<sup>1,9</sup>, L Sheffield<sup>1,4,10</sup>, H Slater<sup>1,4,3</sup>, F Tassone<sup>11</sup>, S Younie<sup>5</sup>, S Metcalfe<sup>1,3</sup>

melissa.martyn@mcri.edu.au  
vicki.anderson@rch.org.au  
alison.archibald@mcri.edu.au  
rob.carter@deakin.edu.au  
jcohen@travelclinic.com.au  
martin.delatycki@ghsv.org.au  
susan.donath@mcri.edu.au  
Jon.Emery@uwa.edu.au  
janehalliday.h@mcri.edu.au  
melissa.hill@gosh.nhs.uk  
les.sheffield@genesfx.com  
howard.slater@vcgs.org.au  
ftassone@ucdavis.edu  
sandra.younie@deakin.edu.au  
sylvia.metcalfe@mcri.edu.au

Affiliations:

1 Murdoch Childrens Research Institute, Melbourne, Victoria, Australia  
2 Royal Children's Hospital, Melbourne, Victoria, Australia  
3 Department of Paediatrics, University of Melbourne, Melbourne, Victoria, Australia  
4 Victorian Clinical Genetics Services, Melbourne, Victoria, Australia  
5 Deakin University, Faculty of Health Melbourne, Victoria, Australia  
6 Fragile X Alliance Clinic; Centre for Developmental Disability Health Victoria, Monash University, Melbourne, Victoria, Australia  
7 Austin Health, Melbourne, Victoria, Australia  
8 School of Primary Aboriginal and Rural Health Care, University of Western Australia; General Practice and Primary Care Academic Centre, University of Melbourne

1  
2  
3 9 Great Ormond Street Hospital for Children, London, UK  
4 10 GenesFX Health Pty Ltd, Melbourne, Victoria, Australia  
5 11 Department of Biochemistry and Molecular Medicine, School of Medicine, University of California  
6 at Davis, Davis, CA, USA; MIND Institute, University of California Davis Medical Center, Sacramento,  
7 CA, USA  
8

9 Primary subject heading: Genetics and Genomics

10 Secondary subject heading: public health

11 Keywords: Genetics, Public Health, Health policy: health administration and management

12  
13 Word Count: 4129

## 14 15 **ARTICLE SUMMARY**

### 16 17 **Article focus**

18 This article is a protocol of a study that involves offering fragile X syndrome carrier screening to  
19 pregnant and non-pregnant women in the general population. We are undertaking a program  
20 evaluation approach using mixed methods to collect data about informed decision-making and  
21 predictors of test uptake, with a focus on psychosocial measures. We are also undertaking an  
22 economic appraisal.  
23  
24

### 25 26 **Key messages**

- 27 • Carrier screening for fragile X syndrome is the subject of debate because of concerns around  
28 education and counselling for this complex condition, and the potential for psychosocial harms.
- 29 • This study will inform policy and practice in the area of population carrier screening by examining  
30 psychosocial aspects of screening, including informed decision-making; models of screening,  
31 through antenatal care or other access points; and health economics of carrier screening for  
32 fragile X syndrome.  
33

### 34 35 **Strengths and limitations of this study**

- 36 • This study seeks to recruit 1000 women in total. This large sample size will give us sufficient  
37 power to address the aims of the study.
- 38 • Collecting both quantitative and qualitative data will provide a more in-depth picture of screening  
39 for fragile X syndrome.
- 40 • A limitation of the study is that the data on models of screening may not be applicable to other  
41 countries that have different healthcare systems.  
42  
43

## 44 45 **ABSTRACT**

46 Fragile X syndrome (FXS), an X-linked genetic condition, is the leading cause of inherited intellectual  
47 and developmental disability. Policy development relating to carrier screening programs for FXS  
48 requires input from large scale studies examining not only test uptake but also psychosocial aspects.  
49 This study will compare carrier screening in pregnant and non-pregnant populations, examining  
50 informed decision-making, psychosocial issues and health economics.  
51

52  
53 Pregnant and non-pregnant women are being recruited from general practices and obstetric  
54 services. Women receive information about the study either in person or through clinic mail outs.  
55 Women are provided pre-test counselling by a genetic counsellor and make a decision about  
56 accepting or declining the FXS carrier test in their own time. Data are being collected from two  
57 questionnaires: one completed at the time of making the decision about FXS carrier testing, and a  
58  
59  
60

1  
2  
3 second one month later. Additional data are gathered through qualitative interviews conducted at  
4 several time-points with a subset of participating women, including all women with a positive test  
5 result, and with staff from clinics involved in recruitment.  
6

7 A minimum sample size of 500 women per group has been calculated to give us 88% power to detect  
8 a 10% difference in test uptake and 87% power to detect a 10% difference in informed choice  
9 between the pregnant and non-pregnant groups.  
10

11 Questionnaire data will be analysed using descriptive statistics and multivariate logistic regression  
12 models. Interview data will be thematically analysed. Willingness-to-pay and cost effectiveness  
13 analyses will also be performed.  
14

15  
16 Ethics approval has been granted by the Universities of Melbourne and Western Australia and from  
17 recruiting clinics, where required. Results will be reported in peer-reviewed publications,  
18 conference and seminar presentations and via a website [www.fragilexscreening.net.au](http://www.fragilexscreening.net.au). The results  
19 of this study will make a significant contribution to discussions about the wider introduction of  
20 population carrier screening for FXS.  
21

## 22 23 INTRODUCTION

24  
25 Population based screening programs are available for a number of genetic conditions in the  
26 newborn, prenatal and preconception settings. Several guidelines based on specific criteria exist to  
27 help assess which genetic conditions are suitable for population screening [1, 2]. Fragile X syndrome  
28 (FXS) is an X-linked condition which meets many of the criteria for population screening, as discussed  
29 in Hill et. al [3]. However, in many countries it is still not routine practice to offer carrier screening  
30 for FXS. This is because of concerns about the challenges of screening for this complex condition,  
31 including the need for genetic counselling and education and the potential psychosocial and other  
32 impacts of a positive result, discussed further in Finucane [4].  
33  
34

35 FXS is the most common inherited cause of intellectual and developmental disability. Virtually all  
36 FXS is caused by an expanded CGG trinucleotide repeat in the 5' untranslated region of the *FMR1*  
37 gene which leads to hypermethylation and silencing of the gene [5-9]. Currently, the normal range  
38 of repeats is defined as 6-44, with 45-54 repeats being considered an intermediate 'grey zone' allele  
39 (GZ), 55-200 a premutation (PM) and >200 repeats a full mutation [10, 11]. The repeats in the GZ,  
40 PM and FM ranges can expand when passed from mother to child, although not usually from father  
41 to child [8, 12, 13].  
42  
43

44 The full mutation is associated with intellectual disability, anxiety and features of autism spectrum  
45 and attention/deficit hyperactivity disorders [14]. The clinical presentation varies between  
46 individuals [15] with males usually more severely affected than females. FXS is not curable but  
47 specific treatments exist which may help a number of the physical [16-19] and behavioural  
48 symptoms [20]. Although there is currently no robust evidence to support specific pharmacological  
49 treatments for people with FXS [21], a number of new therapies are being trialled [22-25] which may  
50 lead to improved treatments in the future.  
51

52 In addition to the reproductive risk of having a child with FXS, female FXS PM carriers also have  
53 personal health risks: an increased risk of fragile X associated primary ovarian insufficiency (FXPOI),  
54 with a 20% risk of premature menopause [26-29]; a higher incidence of mental health issues such as  
55 anxiety and depression [4]; a risk of developing fragile X associated tremor/ataxia syndrome (FXTAS),  
56  
57  
58  
59  
60



1  
2  
3 a late onset neurodegenerative condition, which is more common in male PM carriers than female  
4 [29-31].

5  
6 The reported prevalence of *FMR1* alleles varies. Three large studies examining *FMR1* in anonymous  
7 newborn samples [32-34] found frequencies of the *FMR1* FM in males of 1 in 2633 [33] to 1 in 6,209  
8 [34]. Reported rates of the PM in females in four large studies [12, 34-36] range from 1 in 154 [12]  
9 in Israel to 1 in 549 [34] in Canada, with rates of 1 in 178 [35] and 1 in 209 [36] reported for the USA.  
10 Two large studies reported GZ rates of 1 in 66 [36] to 1 in 85 [34].

11  
12 A number of studies have investigated carrier screening for FXS for women in the general population  
13 [12, 37-46]. Most of these studies focused on uptake of testing, *FMR1* allele sizes and expansion  
14 rates, reproductive choices and pregnancy outcomes. However, genetic population screening  
15 guidelines [1] emphasise the importance of examining the psychosocial aspects of screening,  
16 including informed decision-making. Only our pilot study [43, 47] and one other retrospective study  
17 [39] have measured the psychosocial impacts of screening for FXS and no studies to date have  
18 examined informed decision-making.  
19

20  
21 This study aims to help us better understand the psychosocial aspects of carrier screening for FXS  
22 and will:

- 23 1. Compare informed decision-making by pregnant and non-pregnant women offered carrier  
24 screening for FXS.
- 25 2. Compare uptake and predictors of uptake in pregnant and non-pregnant women offered carrier  
26 screening for FXS.
- 27 3. Undertake an economic appraisal of FXS population carrier screening.  
28

29  
30 Informed decision making is complex and involves many factors [48]. One measure used in  
31 population carrier screening for Down syndrome to estimate informed decision making is the  
32 multidimensional model of informed choice (MMIC) [49], which describes an informed choice as a  
33 decision made with sufficient knowledge that is value consistent. Our study will measure informed  
34 choice using MMIC and will also collect additional information on factors involved in informed  
35 decision making in the two study questionnaires and through qualitative interviews.  
36

37  
38 Our study will also provide information on when to offer population carrier screening for FXS by  
39 comparing screening in non-pregnant and pregnant women. Population carrier screening guidelines  
40 recommend pre-conception carrier screening [1] but such screening is often embedded in antenatal  
41 care, as this provides a convenient (from the perspective of the service provider) point of access,  
42 although may be a more anxious time for women. Research on informed decision-making in  
43 prenatal screening, primarily for Down syndrome, has shown that decisions about testing are often  
44 not informed [50-53]. Our study will be the first to investigate whether rates of informed choice and  
45 uptake differ between pregnant and non-pregnant women.  
46

47 We are testing two hypotheses:

- 48 1. A lower proportion of pregnant women will make an informed decision about carrier screening  
49 compared with non-pregnant women.
- 50 2. Carrier screening for FXS will result in a higher uptake of testing by pregnant women compared  
51 with non-pregnant women.  
52

53  
54 The findings of this study will contribute valuable data to inform debate on policy and approaches to  
55 population carrier screening for FXS.  
56  
57  
58  
59  
60

## METHODS AND ANALYSIS

### Key elements of study design

#### Study design

The development and implementation of an effective carrier screening program is a multi-step process requiring a clear theoretical framework. We have developed a program evaluation model (see Figure One) to investigate FXS carrier screening incorporating 5 stages: (1) negotiation and planning; (2) program development; (3) program implementation; (4) short-term outcomes; and (5) long-term outcomes. The results of our qualitative needs assessment and pilot study, representing stages 1 and 2, have previously been published [43, 47, 54, 55].

The current study covers stages 3 and 4 and uses a mixed-methods approach to data collection to investigate the short-term outcomes of implementing an FXS carrier screening program. Figure Two provides an overview of the study design. Specifically, we will investigate test uptake, informed decision-making, predictors of test uptake, psychosocial outcomes (depression, anxiety, stress, decisional conflict and decisional regret) and health economic factors (willingness-to-pay).

The key elements of the study are that all women will receive a purpose-made brochure and genetic counselling before making a decision about testing, the test is optional, convenient and non-invasive and offered at no charge to the participants. Genetic counselling and the field-tested brochure is included in the protocol, as participants in our pilot study and needs assessment indicated that having sufficient information and the chance to discuss it is important in making an informed decision [43, 54]. Offering a test that can be performed at home after sufficient time for decision-making is important, as we found in our pilot study that having to return to the clinic for an invasive test was identified as a barrier to testing, although did allow some time for deliberation [43]. Recruiting pregnant and non-pregnant women will allow us to examine if there are any differences in test uptake, informed choice or psychosocial measures between these groups. Our economic appraisal will provide important information to guide policy on offering carrier screening for FXS.

Figure One: Program evaluation model to investigate FXS carrier screening

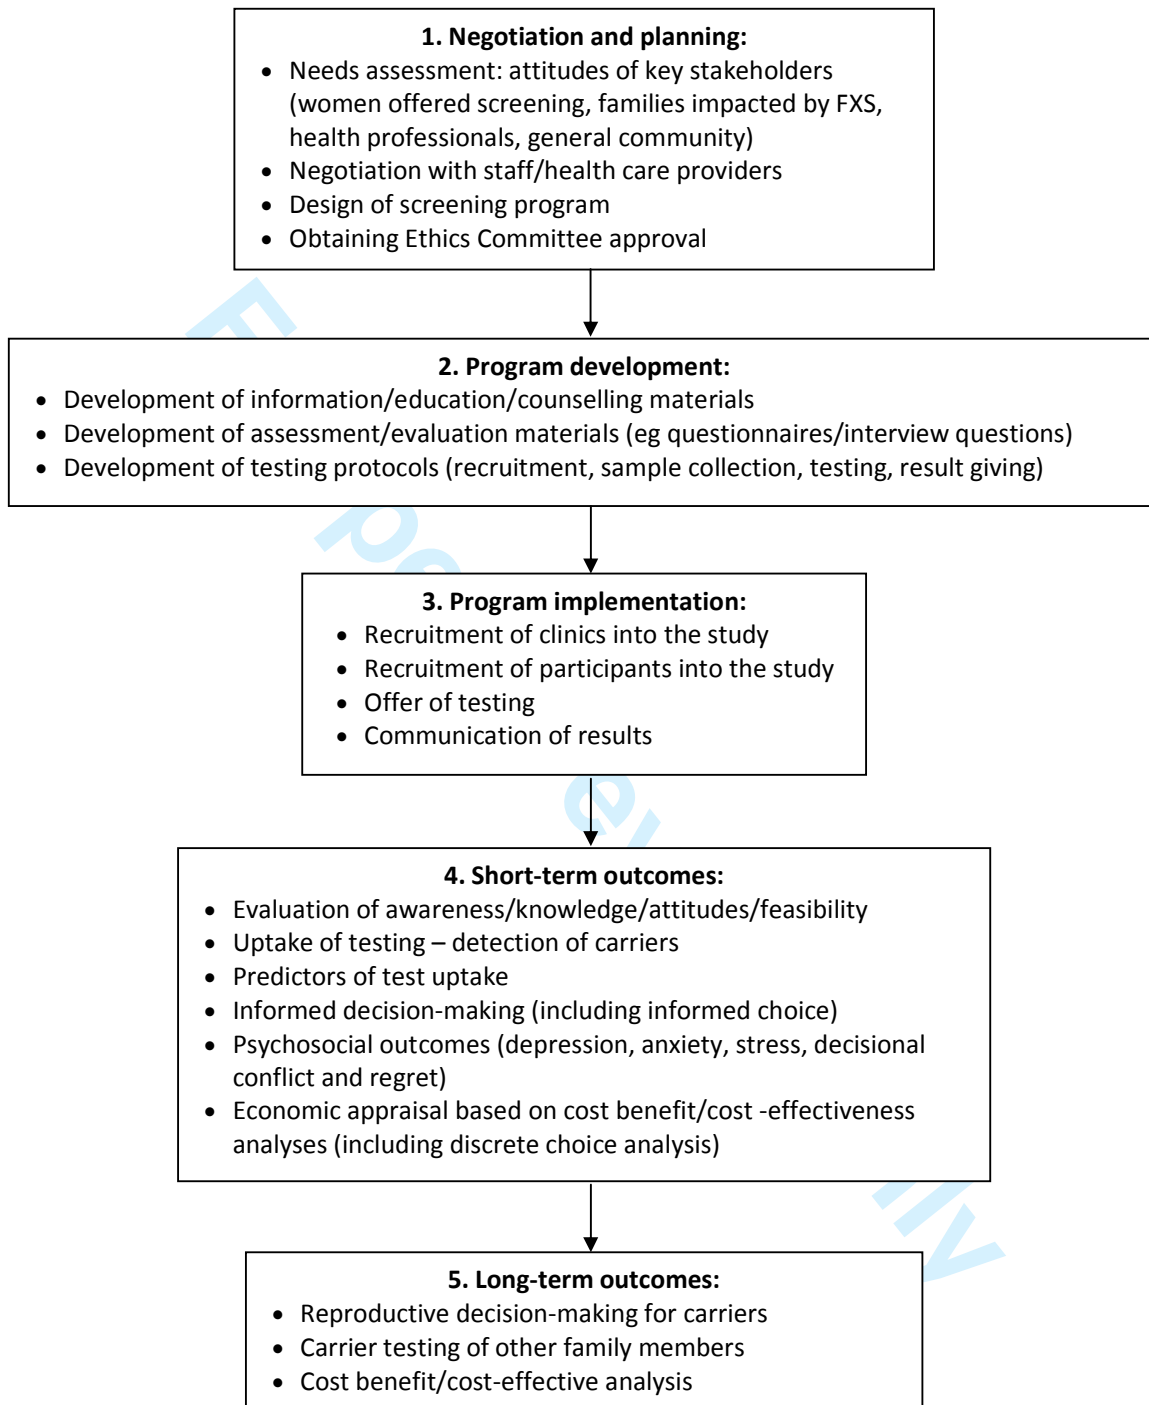

Figure Two: Overview of study protocol

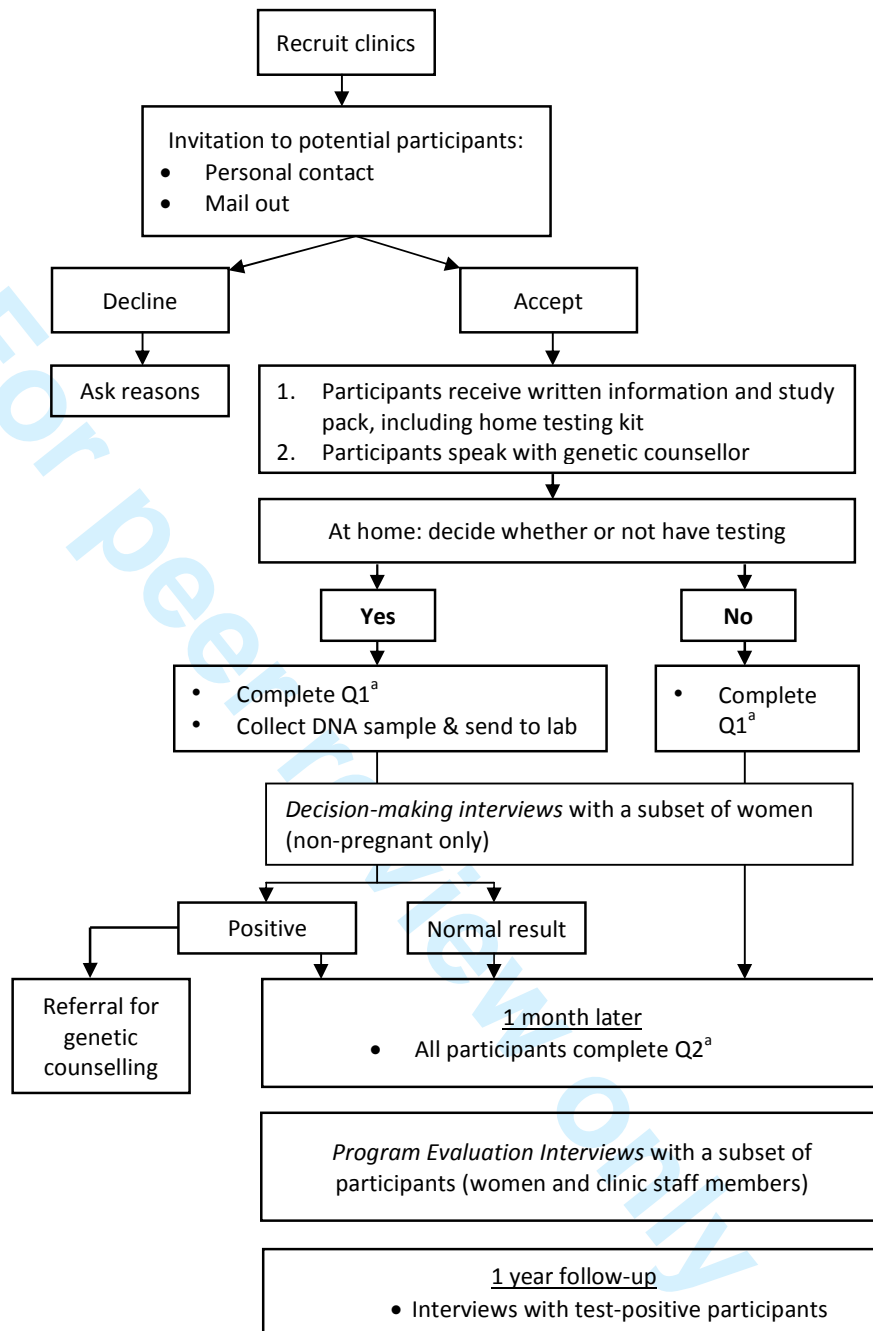

<sup>a</sup> See table 1 for details of measures included in questionnaires 1 and 2

## Settings

The study is being conducted in general practices, public and private obstetric clinics and through private obstetric ultrasound services in Melbourne, Victoria and Perth, Western Australia.

### General Practice

In Australia, women may attend any general practice of their choice, and may attend more than one practice. General practitioners (GPs) are the gatekeepers to access secondary and tertiary care services. About 88% of the Australian population visit a GP at least once a year [56]. Most GP clinics also operate a reminder system for the National Cervical Screening Program, which offers women between the ages of 18 and 69 a cervical (Pap) smear test every two years. Thus most GP clinics have a mail-out system in place to send a reminder letter to their female patients every 2 years. This provides one approach to inviting non-pregnant women into the study and could act as a future service model for population carrier screening.

### Obstetrics

A range of maternity care models exist in Australia but they can be broadly divided into private maternity care, public hospital maternity care and shared local health practitioner/ public hospital maternity care. The first step in accessing maternity care is to attend a GP in early pregnancy to obtain a referral to a private obstetrician or public hospital. The timing of the first appointment with the maternity care provider varies, but in the public hospital system women are often not seen until the second trimester of pregnancy. In 2009, the majority (96.9%) of Australian women gave birth in hospitals and of these, 69.9% (150,157 women) were in the public system and 30.1% (64,771 women) were in the private system [57].

### Obstetric ultrasound – first trimester combined screening

Provision of antenatal screening varies across Australia. In Victoria and Western Australia, first trimester combined screening is available through private pathology laboratories and private ultrasound clinics with some rebate available from the government funded Medicare system, while second trimester screening is state funded. General practitioners or private obstetricians refer women to the private ultrasound clinic for a first trimester nuchal fold thickness scan. In Victoria, about 70% of pregnant women have first trimester combined screening (personal communication, L Bonacquisto, 2013) [58, 59] and so would be expected to attend a private ultrasound practice. In addition to offering testing at initial presentation in primary care, linking FXS carrier screening to first trimester screening is another potential service model.

## Participants

### Enrolling women in the study

Women are eligible to enter the study if they are 18 or over and either not pregnant or up to 12 weeks + 6 days pregnant at the time of recruitment. For non-pregnant women the upper age limit is 70, the age at which participation in the National Cervical Screening Program ends. Women who are unable to speak read and write English are not eligible to enter the study.

Recruitment is occurring in a number of different ways according to the preferences of individual clinics. Non-pregnant women are being recruited from general practice clinics. Women are provided with information about the study either personally (by a researcher, GP, practice nurse or receptionist) or they receive the information through the mail. Study information is not being provided by researchers to women attending general practice clinics who are obviously ill. Pregnant women are being recruited from general practice, private ultrasound and private or public obstetric and ultrasound clinics. In general practice, women are provided with information about the study by the GP when they attend for their pregnancy confirmation appointment. In private ultrasound clinics, study information is provided by clinic reception staff when women attend for their 12 week

1  
2  
3 scan. In private and public obstetric clinics, women are sent the study information in the mail prior  
4 to their first appointment, or are given the information personally by an obstetrician or midwife.  
5 Women who receive information about the study are asked to complete an expression of interest  
6 which is faxed to the research team, either indicating why they do not wish to take part, or providing  
7 their contact details so they can be recruited by a researcher. All recruitment is completed by the  
8 research team and all women speak with a research genetic counsellor.  
9

#### 10 Enrolling clinics in the study

11 General practice clinics located across the metropolitan areas of Melbourne and Perth are being  
12 targeted to try and achieve a geographical spread and a broad representation of different  
13 socioeconomic areas. General practices with established shared-care programs are being identified  
14 using registered shared care provider lists. Professional networks and an in-house database of GPs  
15 and obstetricians who have previously ordered prenatal carrier testing for FXS or cystic fibrosis in  
16 Victoria is also being used to identify practices that might be interested in participating. We  
17 anticipate requiring 5 general practice, 5 private obstetric and 1 obstetric ultrasound clinic to recruit  
18 the 1000 women needed for the study.  
19

20  
21 Members of the project team are providing academic detailing to clinics involved in recruitment.  
22 Academic detailing covers background information on FXS, the aims of the project and what the  
23 study involves for participants. It is emphasised that the aim of the study is not to test as many  
24 women as possible, but rather to understand what factors influence a woman's decision to accept or  
25 decline carrier testing for FXS. Clinics are provided with project resources, including study brochures  
26 and expression of interest forms.  
27

28  
29 Australian GPs are primarily funded by a fee for service system and receive no government funding  
30 (personal or infrastructure) for involvement in research. Private obstetricians and ultrasound clinics  
31 also receive no government funding for involvement in research. All clinics are being offered a small  
32 amount of remuneration to cover their costs of involvement in the study, depending on the number  
33 of women recruited from their clinic.  
34

#### 35 **Data collection**

36 This research protocol will use mixed-methods data collection that includes genetic testing uptake  
37 and outcomes, questionnaires and interviews.  
38

#### 39 Questionnaires

40 The questionnaires use validated and psychometrically robust self-reported scales. Table 1 shows  
41 which scales are used in questionnaire 1 (Q1), completed after making a decision about carrier  
42 testing for FXS, and questionnaire 2 (Q2), completed one month after returning Q1.  
43  
44  
45  
46  
47  
48  
49  
50  
51  
52  
53  
54  
55  
56  
57  
58  
59  
60

Table One: Questionnaire Measures and Scales

| Measure / Scale                                       | Description                                                                                                                                                                                                                                                                                                                                                                                    | Q1 | Q2 |
|-------------------------------------------------------|------------------------------------------------------------------------------------------------------------------------------------------------------------------------------------------------------------------------------------------------------------------------------------------------------------------------------------------------------------------------------------------------|----|----|
| Knowledge                                             | 10 item scale containing questions on FXS (True/False/Unsure). A score of 7 or higher is classified as 'good' knowledge [55]                                                                                                                                                                                                                                                                   | √  | √  |
| Attitudes                                             | 5 item scale (0-4) used to assess a woman's attitude to screening (beneficial/harmful; important/unimportant, bad thing/good thing, pleasant/unpleasant, worrying/not worrying). Dichotomous scale: women are classified as having a positive (11-20) or a negative (0-10) attitude toward screening [49].                                                                                     | √  |    |
| Multi-dimensional Model of Informed Choice (MMIC)     | Defines an informed choice as a decision made with 'good' knowledge which is consistent with a person's values. Incorporates three dimensions: knowledge, attitudes and uptake. Dichotomous scale: 'informed choice' or 'not informed choice' [49].                                                                                                                                            | √  |    |
| Deliberation                                          | 6 item scale measuring the extent to which a decision is deliberated on a 5 point Likert scale (0 = strongly agree – 4 = strongly disagree). Dichotomous scale: responses below the midpoint (11 or under) classified as not deliberated and those at or above the midpoint as deliberated [53].                                                                                               | √  |    |
| Decisional Conflict Scale                             | 16 item scale measuring uncertainty about a course of action on a 5 point Likert scale (0 = strongly agree – 4 = strongly disagree). Mean scores are reported with higher scores indicating higher decisional conflict. Scores range from 0 to 100 with scores over 37.5 associated with decision delay or uncertainty about implementation [60].                                              | √  |    |
| Depression Anxiety Stress Scale, short form (DASS-21) | 21 item scale divided into 3 subscales measuring depression, anxiety and stress. Responses are classified into 5 categories: 1 (normal) to 5 (extremely severe) [61, 62].                                                                                                                                                                                                                      | √  | √  |
| State Trait Anxiety Index, short form (STAI-6)        | 6 item scale measuring state anxiety. The maximum score is 80 with scores 31-49 considered average and scores over 50 indicating elevated state anxiety [59].                                                                                                                                                                                                                                  | √  | √  |
| Health Belief                                         | 16 items measuring the importance of a range of factors which may influence decision-making: perceived benefits; perceived susceptibility; perceived severity; and perceived barriers; in a woman's decision to accept or decline testing for FXS [47, 63]                                                                                                                                     | √  |    |
| Decisional Regret                                     | 5 item scale measuring distress or remorse after a health care decision using a 5 point Likert scale (0-4). Scores range from 0-100 with higher scores indicating a higher level of regret [64].                                                                                                                                                                                               |    | √  |
| Willingness-to-Pay                                    | 2 questions (piloted) that address WTP and gross family income. Income question has 6 income ranges with tick box. WTP question has 11 item income values with tick box and sub-questions that address: i) utility of test (information only or information plus decision-making); and ii) who receives test result (recipient only or recipient plus shared with health share professionals). | √  |    |
| Socio- demographics                                   | Marital status, age, parity, reproductive life-stage, education, occupation, postcode                                                                                                                                                                                                                                                                                                          | √  |    |



## Interviews

To provide in-depth data on participants' experiences, semi-structured qualitative interviews are being conducted with participants at a number of time-points (See Table Two).

**Table Two: Overview of Interview Schedule**

| Time-point                                                | Interview type                               | Interview description                                                                                                                                                                      | Selection                                                                                                                                                                                            |
|-----------------------------------------------------------|----------------------------------------------|--------------------------------------------------------------------------------------------------------------------------------------------------------------------------------------------|------------------------------------------------------------------------------------------------------------------------------------------------------------------------------------------------------|
| After return of Q1, before Q2 and result sent (if tested) | Decision-making interviews                   | Knowledge, attitudes, factors influencing decision-making, the decision-making process, and perspectives on decisions                                                                      | Non-pregnant women only; mix of tested and untested women                                                                                                                                            |
| 1 month after return of Q2                                | Program evaluation interviews (women)        | Motivations for participating, factors influencing decision-making, experience of participating in the study including genetic counselling, reflections on decision and views on screening | Mix of tested and untested women from each clinic, including all women with positive test results. Socio-demographic data examined to ensure selected women are representative of the overall sample |
| After completion of recruitment at any given clinic       | Program evaluation interviews (clinic staff) | Attitudes to population carrier screening for FXS, knowledge of FXS, reflections on offering FXS carrier screening at their clinic, and feedback on the study.                             | Mix of staff from each clinic involved in recruitment                                                                                                                                                |
| 1 year after return of Q2                                 | 1 year follow-up                             | Motivations for screening, interpretation of result, perceived value of result, impact of result and reflections on decision                                                               | All women with a test-positive result (i.e. GZ, PM or FM )                                                                                                                                           |

## Data entry quality control

To ensure accuracy of the questionnaire data, every 20<sup>th</sup> questionnaire entered is being checked prior to analysis. The rate of accuracy will be calculated as the number of errors per number of data items entered. To ensure rigour in the qualitative data analysis, transcripts will be independently coded.

**Testing**

One of the aims of our study is to evaluate the performance of a new innovative assay specifically designed for population screening for FXS [65]. Therefore, for the first part of the study, we collected DNA from a saliva sample (Oragene- DNA collection kit) and carried out the gold standard two step diagnostic test [8, 66] in parallel with the innovative screening test. The routine FXS diagnostic test may involve Southern blotting and so can take up to 4 weeks [43]. This is performed



1  
2  
3 by the Victorian Clinical Genetic Service laboratory. Refinements to the innovative screening assay  
4 [67] mean that we are now able to collect DNA from cheek brush samples and have results available  
5 in one week. This screening assay, marketed by Asuragen, is being performed by Healthscope  
6 Pathology.  
7

8 All women who choose to have carrier testing are being given information about their result based  
9 on current best practice. Women with a result in the normal range receive a letter that includes an  
10 offer to speak to a genetic counsellor at their local clinical service should they require further  
11 information. Women with a test-positive result (GZ, PM or FM) are telephoned and offered face-to-  
12 face genetic counselling at their local clinical genetics service. Genetic counselling for women with  
13 test-positive results follows usual clinical practice [4, 68]. Any pregnant woman found to have a PM  
14 or FM is given her result and, as part of genetic counselling, is offered prenatal diagnostic testing of  
15 the fetus, due to the risk of having a child with FXS. An important outcome of receiving an FXS  
16 carrier result is that relatives can access genetic testing, which may lead to identification of other  
17 carriers and/or the diagnosis of fragile X related disorders in other family members. Genetic testing  
18 is discussed as part of the genetic counselling process and family members are offered genetic  
19 counselling and testing where appropriate.  
20  
21

## 22 **Outcomes**

23 The primary outcomes for the study are test uptake and informed choice. Study participants  
24 (denominator) are defined as the number of women recruited into the study who do not actively  
25 withdraw at any point. Test uptake is defined as the number of women accepting testing  
26 (numerator) divided by the number of study participants and will be reported as a percentage.  
27 Informed choice will be reported as the percentage of women in each group (pregnant and non-  
28 pregnant, tested and untested) making an informed choice as measured using the Multi-dimensional  
29 Measure of Informed Choice (MMIC) [62]. MMIC will be measured in Q1 at the time closest to  
30 decision-making. Knowledge, a component of the MMIC, will be measured in Q1 and Q2 and mean  
31 knowledge scores will be reported for each time-point.  
32  
33

34 The study will also examine predictors of test uptake. These multivariate analyses will make use of  
35 socio-demographic, family history, health belief and psychosocial items included in Q1.  
36

37 Psychosocial factors will be examined as secondary measures in this study, including anxiety,  
38 depression and stress. These will be administered in both questionnaires to allow them to be  
39 measured at the time of decision-making and 1 month later. Decisional conflict will be measured in  
40 Q1 and decisional regret in Q2.  
41  
42

43 State anxiety will be reported as the difference in the mean STAI-6 item short form score of women  
44 in each group (pregnant and non-pregnant, tested and untested, normal result versus test positive).  
45 Depression, anxiety and stress will be reported as the mean score of women in each group.  
46 Decisional conflict and decisional regret will be reported as mean scores.  
47

48 In the willingness-to-pay (WTP) literature there is keen interest in how WTP dollar values for  
49 information may vary in accordance with intended use, who receives the information and capacity-  
50 to-pay. Our questions have been designed to address these key issues. Accordingly, WTP data will  
51 be reported in a number of ways: i) intended use ('information only' and/or 'decision-making –  
52 personal or medical'); ii) by recipients of information ('women only' or 'women plus health care  
53 professionals'); iii) for women in the trial as a whole and for each group (pregnant and non-  
54 pregnant, tested and untested, normal result versus test positive); as mean dollar values together  
55 with associated ranges around each mean to facilitate sensitivity testing.  
56  
57  
58  
59  
60

### Sample size

In our pilot study, in which women were required to return on a separate occasion to give a blood sample, test uptake in non-pregnant women was 20%, although 50% indicated they intended to be tested [43]. Based on the relevance to reproductive life-stage, we expect test uptake in the pregnant group to be greater than in the non-pregnant group. Our minimum sample size of 500 women per group will give us 88% power to detect a difference of 10% in test uptake between groups (50% v 40% or 50% vs 60%). We have less information about the likely percentage of women making an informed choice. If the percentage is 50%, with a minimum sample size of 500 per group an unadjusted analysis would have 87% power to detect a difference of 10% (i.e. 50% vs 40% or 50% vs 60%) between groups. If the base rate is greater than or less than 50% we would have >87% power to detect a difference of 10%. The study will therefore be sufficiently powered to exclude anything other than small percentage differences between groups.

### Proposed analysis

Descriptive statistics will be used to describe the socio-demographic, knowledge, attitudes and psychological characteristics of the sample. To compare uptake of testing by pregnant and non-pregnant women, a multivariate logistic regression model with uptake as the dependent variable, and socio-demographic variables such as age, education and parity, together with pregnant/non-pregnant status and mode of recruitment as the independent variables, will be estimated. This will ensure that a difference in uptake is not due to differences in socio-economic composition of the pregnant and non-pregnant samples. Robust standard errors will be estimated to take into account the possible effect of clustering due to recruitment methods. Odds ratios will be transformed back to percentage differences [69]. A similar analysis will be performed to compare informed choice. To investigate predictors of uptake of testing, a multivariate logistic regression model will be estimated with independent variables including: informed choice, attitudes, number of children, prior awareness of FXS, psychosocial variables, family history of intellectual disability, age and education. Interactions between predictors and pregnancy/non-pregnancy will be examined, and if necessary, separate models will be estimated for pregnant and non-pregnant women.

Interviews are transcribed verbatim and NVivo 10 (QSR International, Australia) is being used to manage the data and facilitate coding. Coding is being done by at least two independent researchers to provide rigour of analysis. The decision-making interviews are being examined using content and thematic analysis. These interviews occur between the return of Q1 and the issuing of results (for tested women) and Q2. As such they involve only non-pregnant women, as we were concerned that an interview at this time before receiving a result, or needing to delay sending out the result prior to the interview, could be distressing for pregnant women at a time when they might be vulnerable. Data from the post-Q2 interviews are being analysed using directed content analysis [70]. The coding framework has been developed using data from the needs assessment phase of the study [43, 47, 54]. As little prior research has explored the experiences of women identified as carrying GZ, PM or FM alleles through population-based carrier screening, or the experiences of staff in clinics offering population carrier screening, the interviews will be analysed thematically. This will involve an iterative process where data are coded, compared, contrasted and refined to generate emergent themes [71] using an approach we have described previously [54].

The economic analysis is matched to the stages of FXS carrier screening described in our program evaluation model (Figure One). At this stage the analysis is concerned with examining stage 3 (program implementation) and stage 4 (short-term outcomes). Placing a dollar value on the health and non-health outcomes of FXS screening is complex. The immediate result of FXS screening is information. That information might be about a risk to a foetus the women is carrying, implications for the women's future health, or implications for the woman's future reproductive health and reproductive choices. It is for this reason that we have started with willingness-to-pay (WTP)

1  
2  
3 methods to explore the value that individuals place on the information provided. The WTP data will  
4 be analysed in accordance with the intervention design and policy issues set out above. The WTP  
5 data will also be analysed to see if there is an association between the dollar values and  
6 preparedness to undergo testing. Similarly, to the extent feasible, the relationship between socio-  
7 demographic variables and WTP will be analysed to see if these variables impact on WTP.  
8

9  
10 Longer-term economic modelling using a surrogate is planned for Stage 5. We aim to go on to  
11 record the actions that the women undertake as a result of their test results and the incidence of  
12 births of babies with FXS to women in the study, discussion of test results with family and  
13 identification of carriers/affected individuals with cascade testing. This will facilitate full economic  
14 appraisal using a range of methods, including discrete choice experiments (DCE). DCE has  
15 applicability to this field because non-health outcomes and process attributes are also important,  
16 and DCE is a logical extension to the WTP for inclusion in Stage 5.  
17

## 18 19 **ETHICS AND DISSEMINATION**

### 20 21 **Ethics**

22 Ethics approval to conduct this study has been granted by the Human Research Ethics Committees of  
23 the Universities of Melbourne (HREC 0830733) and Western Australia (RA/4/1/4028). Additionally,  
24 approval has been granted by the ethics committees of the following recruitment sites: Family  
25 Planning Victoria (09/2); Women's and Newborn Health Service and Charles Gardiner Hospital – King  
26 Edward Memorial Hospital (1925/EW); Swan Kalamunda Health Service (2012-160). This project is  
27 being carried out according to the National Statement on Ethical Conduct in Human Research (2007)  
28 and the Australian Code for the Responsible Conduct of Research (2007) produced by the National  
29 Health and Medical Research Council of Australia. A plain language statement is provided to all  
30 women and to clinics and health professionals involved in recruiting women for the study and a  
31 signed consent form is obtained from all participants at the time of recruitment.  
32  
33

### 34 35 **Steering group and advisory committee**

36 This study has a designated research team and an advisory group. The advisory group includes  
37 representation from the Victorian Department of Health, the Fragile X Association of Australia and  
38 clinicians involved in the study. This group meets annually. The research team includes expertise in  
39 population health, genetics, primary care, epidemiology, FXS, health economics, pathology and  
40 psychology, with the full team meeting quarterly.  
41

### 42 43 **Dissemination**

44 This study will be the first of its kind worldwide to address informed decision-making in carrier  
45 screening for FXS and to compare screening in pregnant and non-pregnant women. It will inform  
46 appropriate clinic service models for offering FXS screening and will provide important exploratory  
47 health economic data. We expect to publish one main trial outcome paper and a number of  
48 additional papers exploring aspects of the data in more detail. We will also present our findings at a  
49 number of international conferences. A report outlining the main findings of the study will also be  
50 made available on the study website [www.fragilexscreening.net.au](http://www.fragilexscreening.net.au) on completion. The findings of  
51 this study will inform policy development about when and how to offer population carrier screening  
52 for FXS.  
53

### 54 55 **Funding statement**

56 This work was supported by a National Health and Medical Research Council project grant [607320]  
57 and the Victorian Government's Operational Infrastructure Support Program. Funding was also  
58  
59  
60

received from the Shepherd Foundation, Helen Macpherson Smith Trust, the Apex Foundation, the Fragile X Alliance Inc, and theme funding from the Murdoch Childrens Research Institute.

## REFERENCES

1. Godard B, Leo ten K, Evers-Kiebooms G, Aymé S. Population genetic screening programmes: principles, techniques, practices, and policies. *Eur J Hum Genet* 2003;**11**:S49-S87.
2. Teutsch SM, Bradley LA, Palomaki GE, et al. The Evaluation of Genomic Applications in Practice and Prevention (EGAPP) Initiative: methods of the EGAPP Working Group. *Genet Med* 2009;**11**(1):3-14.
3. Hill MK, Archibald AD, Cohen J, Metcalfe SA. A systematic review of population screening for fragile X syndrome. *Genet Med* 2010;**12**(7):396-410.
4. Finucane B, Abrams L, Cronister A, Archibald AD, Bennett RL, McConkie-Rosell A. Genetic counseling and testing for FMR1 gene mutations: practice guidelines of the national society of genetic counselors. *J Genet Couns* 2012;**21**(6):752-60.
5. Pieretti M, Zhang FP, Fu YH, et al. Absence of expression of the FMR-1 gene in fragile X syndrome. *Cell* 1991;**66**(4):817-22.
6. Verkerk AJ, Pieretti M, Sutcliffe JS, et al. Identification of a gene (FMR-1) containing a CGG repeat coincident with a breakpoint cluster region exhibiting length variation in fragile X syndrome. *Cell* 1991;**65**(5):905-14.
7. Bell MV, Hirst MC, Nakahori Y, et al. Physical mapping across the fragile X: hypermethylation and clinical expression of the fragile X syndrome. *Cell* 1991;**64**(4):861-6.
8. Fu YH, Kuhl DP, Pizzuti A, et al. Variation of the CGG repeat at the fragile X site results in genetic instability: resolution of the Sherman paradox. *Cell* 1991;**67**(6):1047-58.
9. Yu S, Mulley J, Loesch D, et al. Fragile-X syndrome: unique genetics of the heritable unstable element. *Am J Hum Genet* 1992;**50**(5):968-80.
10. HGSA. Best Practice Fragile X Testing and Analysis Guidelines for Australasian Laboratories, 2012.

- 1  
2  
3 11. Kronquist KE, Sherman SL, Spector EB. Clinical significance of tri-nucleotide repeats in Fragile X  
4  
5 testing: a clarification of American College of Medical Genetics guidelines. *Genet Med*  
6  
7 2008;**10**(11):845-7.  
8
- 9  
10 12. Berkenstadt M, Ries-Levavi L, Cuckle H, Peleg L, Barkai G. Preconceptional and prenatal screening  
11  
12 for fragile X syndrome: experience with 40,000 tests. *Prenat Diagn* 2007;**27**(11):991-4.  
13
- 14 13. Nolin SL, Lewis FA, 3rd, Ye LL, et al. Familial transmission of the FMR1 CGG repeat. *Am J Hum*  
15  
16 *Genet* 1996;**59**(6):1252-61.  
17
- 18 14. Cornish K, Turk J, Hagerman R. The fragile X continuum: new advances and perspectives. *J*  
19  
20 *Intellect Disabil Res* 2008;**52**(Pt 6):469-82.  
21
- 22 15. Hagerman R, Hagerman P. *Fragile X syndrome: diagnosis, treatment, and research*. Baltimore:  
23  
24 Johns Hopkins University Press, 2002.  
25
- 26 16. Davids JR, Hagerman RJ, Eilert RE. Orthopaedic aspects of fragile-X syndrome. *J Bone Joint Surg*  
27  
28 *Am* 1990;**72**(6):889-96.  
29
- 30 17. Hagerman RJ, Altshul-Stark D, McBogg P. Recurrent otitis media in the fragile X syndrome. *Am J*  
31  
32 *Dis Child* 1987;**141**(2):184-7.  
33
- 34 18. Hatton DD, Buckley E, Lachiewicz A, Roberts J. Ocular status of boys with fragile X syndrome: a  
35  
36 prospective study. *J AAPOS* 1998;**2**(5):298-302.  
37
- 38 19. Wirojanan J, Jacquemont S, Diaz R, et al. The efficacy of melatonin for sleep problems in children  
39  
40 with autism, fragile X syndrome, or autism and fragile X syndrome. *J Clin Sleep Med*  
41  
42 2009;**5**(2):145-50.  
43
- 44 20. Hagerman RJ, Berry-Kravis E, Kaufmann WE, et al. Advances in the treatment of fragile X  
45  
46 syndrome. *Pediatrics* 2009;**123**(1):378-90.  
47
- 48 21. Rueda JR, Ballesteros J, Tejada MI. Systematic review of pharmacological treatments in fragile X  
49  
50 syndrome. *BMC Neurol* 2009;**9**:53.  
51  
52  
53  
54  
55  
56  
57  
58  
59  
60

- 1  
2  
3 22. Berry-Kravis EM, Hessler D, Rathmell B, et al. Effects of STX209 (arbaclofen) on neurobehavioral  
4 function in children and adults with fragile X syndrome: a randomized, controlled, phase 2  
5 trial. *Sci Transl Med* 2012;**4**(152):152ra27.  
6  
7  
8  
9 23. Jacquemont S, Curie A, des Portes V, et al. Epigenetic modification of the FMR1 gene in fragile X  
10 syndrome is associated with differential response to the mGluR5 antagonist AFQ056. *Sci*  
11 *Transl Med* 2011;**3**(64):64ra1.  
12  
13  
14 24. Paribello C, Tao L, Folino A, et al. Open-label add-on treatment trial of minocycline in fragile X  
15 syndrome. *BMC Neurol* 2010;**10**:91.  
16  
17  
18 25. Kesler SR, Lightbody AA, Reiss AL. Cholinergic dysfunction in fragile X syndrome and potential  
19 intervention: a preliminary 1H MRS study. *Am J Med Genet* 2009;**149A**(3):403-7.  
20  
21  
22 26. Schwartz CE, Dean J, Howard-Peebles PN, et al. Obstetrical and gynecological complications in  
23 fragile X carriers: A multicenter study. *Am J Med Genet* 1994;**51**(4):400-02.  
24  
25  
26 27. Allingham-Hawkins DJ, Babul-Hirji R, Chitayat D, et al. Fragile X premutation is a significant risk  
27 factor for premature ovarian failure: the International Collaborative POF in Fragile X study--  
28 preliminary data. *Am J Med Genet* 1999;**83**(4):322-5.  
29  
30  
31 28. Sherman SL. Premature ovarian failure in the fragile X syndrome. *Am J Med Genet*  
32 2000;**97**(3):189-94.  
33  
34  
35 29. Rodriguez-Revenga L, Madrigal I, Pagonabarraga J, et al. Penetrance of FMR1 premutation  
36 associated pathologies in fragile X syndrome families. *Eur J Hum Genet* 2009;**17**(10):1359-62.  
37  
38  
39 30. Hagerman RJ, Leehey M, Heinrichs W, et al. Intention tremor, parkinsonism, and generalized  
40 brain atrophy in male carriers of fragile X. *Neurology* 2001;**57**(1):127-30.  
41  
42  
43 31. Jacquemont S, Hagerman RJ, Leehey M, et al. Fragile X premutation tremor/ataxia syndrome:  
44 molecular, clinical, and neuroimaging correlates. *Am J Hum Genet* 2003;**72**(4):869-78.  
45  
46  
47 32. Coffee B, Keith K, Albizua I, et al. Incidence of fragile X syndrome by newborn screening for  
48 methylated FMR1 DNA. *Am J Hum Genet* 2009;**85**(4):503-14.  
49  
50  
51  
52  
53  
54  
55  
56  
57  
58  
59  
60

- 1  
2  
3 33. Fernandez-Carvajal I, Walichiewicz P, Xiaosen X, Pan R, Hagerman PJ, Tassone F. Screening for  
4  
5 expanded alleles of the FMR1 gene in blood spots from newborn males in a Spanish  
6  
7 population. *J Mol Diagn* 2009;**11**(4):324-9.  
8  
9  
10 34. Levesque S, Dombrowski C, Morel ML, et al. Screening and instability of FMR1 alleles in a  
11  
12 prospective sample of 24,449 mother-newborn pairs from the general population. *Clin*  
13  
14 *Genet* 2009;**76**(6):511-23.  
15  
16 35. Hantash FM, Goos DM, Crossley B, et al. FMR1 premutation carrier frequency in patients  
17  
18 undergoing routine population-based carrier screening: insights into the prevalence of  
19  
20 fragile X syndrome, fragile X-associated tremor/ataxia syndrome, and fragile X-associated  
21  
22 primary ovarian insufficiency in the United States. *Genet Med* 2011;**13**(1):39-45.  
23  
24 36. Tassone F, Long KP, Tong TH, et al. FMR1 CGG allele size and prevalence ascertained through  
25  
26 newborn screening in the United States. *Genome Med* 2012;**4**(12):100.  
27  
28  
29 37. Spence WC, Black SH, Fallon L, et al. Molecular fragile X screening in normal populations. *Am J*  
30  
31 *Med Genet* 1996;**64**(1):181-3.  
32  
33 38. Pessa R, Berkenstadt M, Cuckle H, et al. Screening for fragile X syndrome in women of  
34  
35 reproductive age. *Prenat Diagn* 2000;**20**(8):611-4.  
36  
37  
38 39. Ryyanen M, Heinonen S, Makkonen M, Kajanoja E, Mannermaa A, Pertti K. Feasibility and  
39  
40 acceptance of screening for fragile X mutations in low-risk pregnancies. *Eur J Hum Genet*  
41  
42 1999;**7**(2):212-6.  
43  
44 40. Toledano-Alhadeff H, Basel-Vanagaite L, Magal N, et al. Fragile-X carrier screening and the  
45  
46 prevalence of premutation and full-mutation carriers in Israel. *Am J Hum Genet*  
47  
48 2001;**69**(2):351-60.  
49  
50 41. Cronister A, DiMaio M, Mahoney MJ, Donnenfeld AE, Hallam S. Fragile X syndrome carrier  
51  
52 screening in the prenatal genetic counseling setting. *Genet Med* 2005;**7**(4):246-50.  
53  
54 42. Anido A, Carlson LM, Taft L, Sherman SL. Women's attitudes toward testing for fragile X carrier  
55  
56 status: a qualitative analysis. *J Genet Couns* 2005;**14**(4):295-306.  
57  
58  
59  
60



- 1  
2  
3 43. Metcalfe S, Jacques A, Archibald A, et al. A model for offering carrier screening for fragile X  
4  
5 syndrome to nonpregnant women: results from a pilot study. *Genet Med* 2008;**10**(7):525-35.  
6  
7 44. Geva E, Yaron Y, Shomrat R, et al. The risk of fragile X premutation expansion is lower in carriers  
8  
9 detected by general prenatal screening than in carriers from known fragile X families. *Genet*  
10  
11 *Test* 2000;**4**(3):289-92.  
12  
13 45. Fanos JH, Spangner KA, Musci TJ. Attitudes toward prenatal screening and testing for Fragile X.  
14  
15 *Genet Med* 2006;**8**(2):129-33.  
16  
17 46. Musci TJ, Caughey AB. Cost-effectiveness analysis of prenatal population-based fragile X carrier  
18  
19 screening. *Am J Obstet Gynecol* 2005;**192**(6):1905-12.  
20  
21 47. Archibald AD, Jaques AM, Wake S, Collins VR, Cohen J, Metcalfe SA. "It's something I need to  
22  
23 consider": Decisions about carrier screening for fragile X syndrome in a population of non-  
24  
25 pregnant women. *Am J Med Genet A* 2009;**149A**(12):2731-8.  
26  
27 48. Bekker H, Thornton JG, Airey CM, et al. Informed decision making: an annotated bibliography  
28  
29 and systematic review. *Health Technol Assess* 1999;**3**(1):1-156.  
30  
31 49. Marteau TM, Dormandy E, Michie S. A measure of informed choice. *Health Expect* 2001;**4**(2):99-  
32  
33 108.  
34  
35 50. Jaques AM, Halliday JL, Bell RJ. Do women know that prenatal testing detects fetuses with Down  
36  
37 syndrome? *J Obstet Gynaecol* 2004;**24**(6):647-51.  
38  
39 51. Jaques AM, Sheffield LJ, Halliday JL. Informed choice in women attending private clinics to  
40  
41 undergo first-trimester screening for Down syndrome. *Prenat Diagn* 2005;**25**(8):656-64.  
42  
43 52. Rowe HJ, Fisher JR, Quinlivan JA. Are pregnant Australian women well informed about prenatal  
44  
45 genetic screening? A systematic investigation using the Multidimensional Measure of  
46  
47 Informed Choice. *Aust N Z J Obstet Gynaecol* 2006;**46**(5):433-9.  
48  
49 53. van den Berg M, Timmermans DR, ten Kate LP, van Vugt JM, van der Wal G. Informed decision-  
50  
51 making in the context of prenatal screening. *Patient Educ Couns* 2006;**63**(1-2):110-7.  
52  
53  
54  
55  
56  
57  
58  
59  
60



- 1  
2  
3 54. Archibald AD, Hickerton CL, Jaques AM, Wake S, Cohen J, Metcalfe SA. "It's about having the  
4  
5 choice": stakeholder perceptions of population-based genetic carrier screening for fragile X  
6  
7 syndrome. *Am J Med Genet A* 2013;**161A**(1):48-58.  
8  
9  
10 55. Ames AG, Jaques A, Ukoumunne OC, et al. Development of a fragile X syndrome (FXS) knowledge  
11  
12 scale: towards a modified multidimensional measure of informed choice for FXS population  
13  
14 carrier screening. *Health Expect* Published Online First: 2012/10/17. doi:10.1111/hex.12009  
15  
16 56. Britt H, Miller G, editors. General practice in Australia, health priorities and policies 1998 to 2008.  
17  
18 Canberra: Australian Institute of Health and Welfare and the University of Sydney, 2009.  
19  
20 57. Li Z, McNally L, Hilder L, EA S. Australia's mothers and babies 2009. Perinatal statistics series no.  
21  
22 25. Cat. no. PER 52. Sydney: Australian Institute of Health and Welfare National Perinatal  
23  
24 Epidemiology and Statistics Unit, 2011.  
25  
26 58. Breheny N, O'Leary P, Dickinson J, et al. Statewide evaluation of first trimester screening for  
27  
28 Down syndrome and other fetal anomalies in Western Australia. *Genomics Occasional Paper*  
29  
30 5.: Prenatal Diagnosis Committee Department of Health Western Australia, 2005.  
31  
32  
33 59. Marteau TM, Bekker H. The development of a six-item short-form of the state scale of the  
34  
35 Spielberger State-Trait Anxiety Inventory (STAI). *Br J Clin Psychol* 1992;**31 ( Pt 3)**:301-6.  
36  
37 60. O'Connor A. User Manual – Decisional Conflict Scale (16 item statement format). Ottawa: Ottawa  
38  
39 Hospital Research Institute;  
40  
41 doi:[http://decisionaid.ohri.ca/docs/develop/User\\_Manuals/UM\\_Decisional\\_Conflict.pdf](http://decisionaid.ohri.ca/docs/develop/User_Manuals/UM_Decisional_Conflict.pdf)  
42  
43  
44 61. Crawford JR, Henry JD. The Depression Anxiety Stress Scales (DASS): normative data and latent  
45  
46 structure in a large non-clinical sample. *Br J Clin Psychol* 2003;**42**(Pt 2):111-31.  
47  
48 62. Lovibond SH, Lovibond PF. Manual for the Depression Anxiety Stress Scales (2nd. Ed.) Sydney:  
49  
50 Psychology Foundation, 1995.  
51  
52  
53 63. Janz NK, Becker MH. The Health Belief Model: a decade later. *Health Educ Q* 1984;**11**(1):1-47.  
54  
55 64. O'Connor A. User Manual – Decision Regret Scale. Ottawa: Ottawa Hospital Research Institute  
56  
57 doi: [http://decisionaid.ohri.ca/docs/develop/User\\_Manuals/UM\\_Regret\\_Scale.pdf](http://decisionaid.ohri.ca/docs/develop/User_Manuals/UM_Regret_Scale.pdf)  
58  
59  
60

- 1  
2  
3 65. Tassone F, Pan R, Amiri K, Taylor AK, Hagerman PJ. A rapid polymerase chain reaction-based  
4  
5 screening method for identification of all expanded alleles of the fragile X (FMR1) gene in  
6  
7 newborn and high-risk populations. *J Mol Diagn* 2008;**10**(1):43-9.  
8  
9  
10 66. Khaniani MS, Kalitsis P, Burgess T, Slater HR. An improved Diagnostic PCR Assay for identification  
11  
12 of Cryptic Heterozygosity for CGG Triplet Repeat Alleles in the Fragile X Gene (FMR1). *Mol*  
13  
14 *Cytogenet* 2008;**1**(1):5.  
15  
16 67. Chen L, Hadd A, Sah S, et al. An information-rich CGG repeat primed PCR that detects the full  
17  
18 range of fragile X expanded alleles and minimizes the need for southern blot analysis. *J Mol*  
19  
20 *Diagn* 2010;**12**(5):589-600.  
21  
22 68. McConkie-Rosell A, Finucane B, Cronister A, Abrams L, Bennett RL, Pettersen BJ. Genetic  
23  
24 counseling for fragile x syndrome: updated recommendations of the national society of  
25  
26 genetic counselors. *J Genet Couns* 2005;**14**(4):249-70.  
27  
28  
29 69. Localio AR, Margolis DJ, Berlin JA. Relative risks and confidence intervals were easily computed  
30  
31 indirectly from multivariable logistic regression. *J Clin Epidemiol* 2007;**60**(9):874-82.  
32  
33 70. Hsieh HF, Shannon SE. Three approaches to qualitative content analysis. *Qual Health Res*  
34  
35 2005;**15**(9):1277-88.  
36  
37  
38 71. Charmaz K. *Constructing grounded theory: A practical guide through qualitative analysis*. Los  
39  
40 Angeles: Sage, 2006.  
41  
42  
43  
44  
45  
46  
47  
48  
49  
50  
51  
52  
53  
54  
55  
56  
57  
58  
59  
60



**Offering fragile X syndrome carrier screening: a prospective mixed-methods observational study comparing carrier screening of pregnant and non-pregnant women in the general population**



|                                 |                                                                                                                                                                                                                                                                                                                                                                                                                                                                                                                                                                                                                                                                                                                                                                                                                                                                                                                                                                                                                                                                                                                                                                                                                                                                                                                                                                                                                                                                                                                                                                                                                                       |
|---------------------------------|---------------------------------------------------------------------------------------------------------------------------------------------------------------------------------------------------------------------------------------------------------------------------------------------------------------------------------------------------------------------------------------------------------------------------------------------------------------------------------------------------------------------------------------------------------------------------------------------------------------------------------------------------------------------------------------------------------------------------------------------------------------------------------------------------------------------------------------------------------------------------------------------------------------------------------------------------------------------------------------------------------------------------------------------------------------------------------------------------------------------------------------------------------------------------------------------------------------------------------------------------------------------------------------------------------------------------------------------------------------------------------------------------------------------------------------------------------------------------------------------------------------------------------------------------------------------------------------------------------------------------------------|
| Journal:                        | <i>BMJ Open</i>                                                                                                                                                                                                                                                                                                                                                                                                                                                                                                                                                                                                                                                                                                                                                                                                                                                                                                                                                                                                                                                                                                                                                                                                                                                                                                                                                                                                                                                                                                                                                                                                                       |
| Manuscript ID:                  | bmjopen-2013-003660.R1                                                                                                                                                                                                                                                                                                                                                                                                                                                                                                                                                                                                                                                                                                                                                                                                                                                                                                                                                                                                                                                                                                                                                                                                                                                                                                                                                                                                                                                                                                                                                                                                                |
| Article Type:                   | Protocol                                                                                                                                                                                                                                                                                                                                                                                                                                                                                                                                                                                                                                                                                                                                                                                                                                                                                                                                                                                                                                                                                                                                                                                                                                                                                                                                                                                                                                                                                                                                                                                                                              |
| Date Submitted by the Author:   | 30-Jul-2013                                                                                                                                                                                                                                                                                                                                                                                                                                                                                                                                                                                                                                                                                                                                                                                                                                                                                                                                                                                                                                                                                                                                                                                                                                                                                                                                                                                                                                                                                                                                                                                                                           |
| Complete List of Authors:       | <p>Martyn, Melissa; Murdoch Childrens Research Institute, Genetics Education and Health Research<br/>           Anderson, Vivki; Murdoch Childrens Research Institute, Archibald, Alison; Victorian Clinical Genetics Service, Maternal Serum Screening<br/>           Carter, Rob; Deakin University, Faculty of Health<br/>           Cohen, Jonathan; Fragile X Alliance Clinic, ; Monash University, Centre for Developmental Disability Health Victoria<br/>           Delatycki, Martin; Austin Health, ; Murdoch Childrens Research Institute, Donath, Susan; Murdoch Childrens Research Institute, Clinical Epidemiology and Biostatistics Unit; University of Melbourne, Department of Paediatrics<br/>           Emery, Jon; University of Western Australia, School of Primary Aboriginal and Rural Health Care; University of Melbourne, General Practice and Primary Care Academic Centre<br/>           Halliday, Jane; Murdoch Childrens Research Institute, ; University of Melbourne, Department of Paediatrics<br/>           Hill, Melissa; Great Ormond Street Hospital for Children, Sheffield, Les; GenesFX Health Pty Ltd, ; Victorian Clinical Genetics Services,<br/>           Slater, Howard; Murdoch Childrens Research Institute, Cyto-molecular Diagnostics Research<br/>           Tassone, Flora; University of California at Davis, Department of Biochemistry and Molecular Medicine; University of California Davis Medical Center, MIND Institute<br/>           Younie, Sandra; Deakin University, Faculty of Health<br/>           Metcalfe, Sylvia; Genetics Education and Health Research</p> |
| <b>Primary Subject Heading</b>: | Genetics and genomics                                                                                                                                                                                                                                                                                                                                                                                                                                                                                                                                                                                                                                                                                                                                                                                                                                                                                                                                                                                                                                                                                                                                                                                                                                                                                                                                                                                                                                                                                                                                                                                                                 |
| Secondary Subject Heading:      | Public health                                                                                                                                                                                                                                                                                                                                                                                                                                                                                                                                                                                                                                                                                                                                                                                                                                                                                                                                                                                                                                                                                                                                                                                                                                                                                                                                                                                                                                                                                                                                                                                                                         |
| Keywords:                       | GENETICS, PUBLIC HEALTH, Health policy < HEALTH SERVICES ADMINISTRATION & MANAGEMENT                                                                                                                                                                                                                                                                                                                                                                                                                                                                                                                                                                                                                                                                                                                                                                                                                                                                                                                                                                                                                                                                                                                                                                                                                                                                                                                                                                                                                                                                                                                                                  |
|                                 |                                                                                                                                                                                                                                                                                                                                                                                                                                                                                                                                                                                                                                                                                                                                                                                                                                                                                                                                                                                                                                                                                                                                                                                                                                                                                                                                                                                                                                                                                                                                                                                                                                       |

1  
2  
3  
4  
5  
6  
7  
8  
9  
10  
11  
12  
13  
14  
15  
16  
17  
18  
19  
20  
21  
22  
23  
24  
25  
26  
27  
28  
29  
30  
31  
32  
33  
34  
35  
36  
37  
38  
39  
40  
41  
42  
43  
44  
45  
46  
47  
48  
49  
50  
51  
52  
53  
54  
55  
56  
57  
58  
59  
60

SCHOLARONE™  
Manuscripts

For peer review only

## TITLE PAGE

'Offering fragile X syndrome carrier screening: a prospective mixed-methods observational study comparing carrier screening of pregnant and non-pregnant women in the general population'

Short title: Fragile X syndrome carrier screening in the general population

Corresponding author:

Prof Sylvia Metcalfe  
Genetics Education and Health Research  
Murdoch Childrens Research Institute  
Royal Childrens Hospital  
Flemington Rd  
Parkville  
VIC 3052  
AUSTRALIA  
E: Sylvia.metcalfe@mcri.edu.au  
T: +61 3 8341 6309  
F: +61 3 8341 6207

Authors:

M Martyn<sup>1</sup>, V Anderson<sup>1,2,3</sup>, A Archibald<sup>1,3,4</sup>, R Carter<sup>5</sup>, J Cohen<sup>6</sup>, M Delatycki<sup>1,7</sup>, S Donath<sup>1,3</sup>, J Emery<sup>8</sup>, J Halliday<sup>1,3</sup>, M Hill<sup>1,9</sup>, L Sheffield<sup>1,4,10</sup>, H Slater<sup>1,4,3</sup>, F Tassone<sup>11</sup>, S Younie<sup>5</sup>, S Metcalfe<sup>1,3</sup>

melissa.martyn@mcri.edu.au  
vicki.anderson@rch.org.au  
alison.archibald@mcri.edu.au  
rob.carter@deakin.edu.au  
jcohen@travelclinic.com.au  
martin.delatycki@ghsv.org.au  
susan.donath@mcri.edu.au  
Jon.Emery@uwa.edu.au  
janehalliday.h@mcri.edu.au  
melissa.hill@gosh.nhs.uk  
les.sheffield@genesfx.com  
howard.slater@vcgs.org.au  
ftassone@ucdavis.edu  
sandra.younie@deakin.edu.au  
sylvia.metcalfe@mcri.edu.au

Affiliations:

1 Murdoch Childrens Research Institute, Melbourne, Victoria, Australia  
2 Royal Children's Hospital, Melbourne, Victoria, Australia  
3 Department of Paediatrics, University of Melbourne, Melbourne, Victoria, Australia  
4 Victorian Clinical Genetics Services, Melbourne, Victoria, Australia  
5 Deakin University, Faculty of Health Melbourne, Victoria, Australia  
6 Fragile X Alliance Clinic; Centre for Developmental Disability Health Victoria, Monash University, Melbourne, Victoria, Australia  
7 Austin Health, Melbourne, Victoria, Australia  
8 School of Primary Aboriginal and Rural Health Care, University of Western Australia; General Practice and Primary Care Academic Centre, University of Melbourne

1  
2  
3 9 Great Ormond Street Hospital for Children, London, UK  
4 10 GenesFX Health Pty Ltd, Melbourne, Victoria, Australia  
5 11 Department of Biochemistry and Molecular Medicine, School of Medicine, University of California  
6 at Davis, Davis, CA, USA; MIND Institute, University of California Davis Medical Center, Sacramento,  
7 CA, USA  
8  
9

## 10 **ARTICLE SUMMARY**

### 11 **Article focus**

12 This article is a protocol of a study that involves offering fragile X syndrome carrier screening to  
13 pregnant and non-pregnant women in the general population. We are undertaking a program  
14 evaluation approach using mixed methods to collect data about informed decision-making and  
15 predictors of test uptake, with a focus on psychosocial measures. We are also undertaking an  
16 economic appraisal.  
17  
18  
19

### 20 **Key messages**

- 21 • Carrier screening for fragile X syndrome is the subject of debate because of concerns around  
22 education and counselling for this complex condition, and the potential for psychosocial harms.
- 23 • This study will inform policy and practice in the area of population carrier screening by  
24 examining psychosocial aspects of screening, including informed decision-making; models of  
25 screening, through antenatal care or other access points; and health economics of carrier  
26 screening for fragile X syndrome.  
27  
28

### 29 **Strengths and limitations of this study**

- 30 • This study seeks to recruit 1000 women in total. This large sample size will give us sufficient  
31 power to address the aims of the study.
- 32 • Collecting both quantitative and qualitative data will provide a more in-depth picture of  
33 screening for fragile X syndrome.
- 34 • A limitation of the study is that the data on models of screening may not be applicable to other  
35 countries that have different healthcare systems.  
36  
37  
38

## 39 **ABSTRACT**

### 40 **Introduction**

41 Fragile X syndrome (FXS), an X-linked genetic condition, is the leading cause of inherited intellectual  
42 and developmental disability. Policy development relating to carrier screening programs for FXS  
43 requires input from large scale studies examining not only test uptake but also psychosocial aspects.  
44 This study will compare carrier screening in pregnant and non-pregnant populations, examining  
45 informed decision-making, psychosocial issues and health economics.  
46  
47  
48

### 49 **Methods and Analysis**

50 Pregnant and non-pregnant women are being recruited from general practices and obstetric  
51 services. Women receive information about the study either in person or through clinic mail outs.  
52 Women are provided pre-test counselling by a genetic counsellor and make a decision about  
53 accepting or declining the FXS carrier test in their own time. Data are being collected from two  
54 questionnaires: one completed at the time of making the decision about FXS carrier testing, and a  
55 second one month later. Additional data are gathered through qualitative interviews conducted at  
56 several time-points with a subset of participating women, including all women with a positive test  
57 result, and with staff from clinics involved in recruitment.  
58  
59  
60

1  
2  
3  
4 A minimum sample size of 500 women per group has been calculated to give us 88% power to detect  
5 a 10% difference in test uptake and 87% power to detect a 10% difference in informed choice  
6 between the pregnant and non-pregnant groups.  
7

8 Questionnaire data will be analysed using descriptive statistics and multivariate logistic regression  
9 models. Interview data will be thematically analysed. Willingness-to-pay and cost effectiveness  
10 analyses will also be performed.  
11

12 Recruitment commenced in July 2009 and data collection will be completed by December 2013.  
13

#### 14 **Ethics and Dissemination**

15 Ethics approval has been granted by the Universities of Melbourne and Western Australia and from  
16 recruiting clinics, where required. Results will be reported in peer-reviewed publications,  
17 conference and seminar presentations and via a website [www.fragilexscreening.net.au](http://www.fragilexscreening.net.au). The results  
18 of this study will make a significant contribution to discussions about the wider introduction of  
19 population carrier screening for FXS.  
20  
21

#### 22 **INTRODUCTION**

23  
24 Population based screening programs are available for a number of genetic conditions in the  
25 newborn, prenatal and preconception settings. Several guidelines based on specific criteria exist to  
26 help assess which genetic conditions are suitable for population screening [1, 2]. Fragile X syndrome  
27 (FXS) is an X-linked condition which meets many of the criteria for population screening, as discussed  
28 in Hill et. al [3]. However, in many countries it is still not routine practice to offer carrier screening  
29 for FXS. This is because of concerns about the challenges of screening for this complex condition,  
30 including the need for genetic counselling and education and the potential psychosocial and other  
31 impacts of a positive result, discussed further in Finucane [4].  
32  
33

34  
35 FXS is the most common inherited cause of intellectual and developmental disability. Virtually all  
36 FXS is caused by an expanded CGG trinucleotide repeat in the 5' untranslated region of the *FMR1*  
37 gene which leads to hypermethylation and silencing of the gene [5-9]. Currently, the normal range  
38 of repeats is defined as 6-44, with 45-54 repeats being considered an intermediate 'grey zone' allele  
39 (GZ), 55-200 a premutation (PM) and >200 repeats a full mutation [10, 11]. The repeats in the GZ,  
40 PM and FM ranges can expand when passed from mother to child, although not usually from father  
41 to child [8, 12, 13].  
42  
43

44 The full mutation is associated with intellectual disability, anxiety and features of autism spectrum  
45 and attention/deficit hyperactivity disorders [14]. The clinical presentation varies between  
46 individuals [15] with males usually more severely affected than females. FXS is not curable but  
47 specific treatments exist which may help a number of the physical [16-19] and behavioural  
48 symptoms [20]. Although there is currently no robust evidence to support specific pharmacological  
49 treatments for people with FXS [21], a number of new therapies are being trialled [22-25] which may  
50 lead to improved treatments in the future.  
51  
52

53 In addition to the reproductive risk of having a child with FXS, female FXS PM carriers also have  
54 personal health risks: an increased risk of fragile X associated primary ovarian insufficiency (FXPOI),  
55 with a 20% risk of premature menopause [26-29]; a higher incidence of mental health issues such as  
56 anxiety and depression [4]; a risk of developing fragile X associated tremor/ataxia syndrome (FXTAS),  
57  
58  
59  
60

1  
2  
3 a late onset neurodegenerative condition, which is more common in male PM carriers than female  
4 [29-31].

5  
6 The reported prevalence of *FMR1* alleles varies. Three large studies examining *FMR1* in anonymous  
7 newborn samples [32-34] found frequencies of the *FMR1* FM in males of 1 in 2633 [33] to 1 in 6,209  
8 [34]. Reported rates of the PM in females in four large studies [12, 34-36] range from 1 in 154 [12]  
9 in Israel to 1 in 549 [34] in Canada, with rates of 1 in 178 [35] and 1 in 209 [36] reported for the USA.  
10 Two large studies reported GZ rates of 1 in 66 [36] to 1 in 85 [34].

11  
12 A number of studies have investigated carrier screening for FXS for women in the general population  
13 [12, 37-46]. Most of these studies focused on uptake of testing, *FMR1* allele sizes and expansion  
14 rates, reproductive choices and pregnancy outcomes. However, genetic population screening  
15 guidelines [1] emphasise the importance of examining the psychosocial aspects of screening,  
16 including informed decision-making. Only our pilot study [43, 47] and one other retrospective study  
17 [39] have measured the psychosocial impacts of screening for FXS and no studies to date have  
18 examined informed decision-making.  
19

20  
21 This study aims to help us better understand the psychosocial aspects of carrier screening for FXS  
22 and will:

- 23  
24 1. Compare informed decision-making by pregnant and non-pregnant women offered carrier  
25 screening for FXS.  
26 2. Compare uptake and predictors of uptake in pregnant and non-pregnant women offered carrier  
27 screening for FXS.  
28 3. Undertake an economic appraisal of FXS population carrier screening.  
29

30  
31 Informed decision making is complex and involves many factors [48]. One measure used in  
32 population carrier screening for Down syndrome to estimate informed decision making is the  
33 multidimensional model of informed choice (MMIC) [49], which describes an informed choice as a  
34 decision made with sufficient knowledge that is value consistent. Our study will measure informed  
35 choice using MMIC and will also collect additional information on factors involved in informed  
36 decision making in the two study questionnaires and through qualitative interviews.  
37

38  
39 Our study will also provide information on when to offer population carrier screening for FXS by  
40 comparing screening in non-pregnant and pregnant women. Population carrier screening guidelines  
41 recommend pre-conception carrier screening [1] but such screening is often embedded in antenatal  
42 care, as this provides a convenient (from the perspective of the service provider) point of access,  
43 although may be a more anxious time for women. Research on informed decision-making in  
44 prenatal screening, primarily for Down syndrome, has shown that decisions about testing are often  
45 not informed [50-53]. Our study will be the first to investigate whether rates of informed choice and  
46 uptake differ between pregnant and non-pregnant women.  
47

48 We are testing two hypotheses:

- 49 1. A lower proportion of pregnant women will make an informed decision about carrier screening  
50 compared with non-pregnant women.  
51 2. Carrier screening for FXS will result in a higher uptake of testing by pregnant women compared  
52 with non-pregnant women.  
53

54 The findings of this study will contribute valuable data to inform debate on policy and approaches to  
55 population carrier screening for FXS.  
56  
57  
58  
59  
60



## METHODS AND ANALYSIS

### Key elements of study design

#### Study design

The development and implementation of an effective carrier screening program is a multi-step process requiring a clear theoretical framework. We have developed a program logic model (see Figure One) to investigate FXS carrier screening incorporating 5 stages: (1) negotiation and planning; (2) program development; (3) program implementation; (4) short-term outcomes; and (5) long-term outcomes. The results of our qualitative needs assessment and pilot study, representing stages 1 and 2, have previously been published [43, 47, 54, 55].

The current study covers stages 3 and 4 and uses a mixed-methods approach to data collection to investigate the short-term outcomes of implementing an FXS carrier screening program. Figure Two provides an overview of the study design. Specifically, we will investigate test uptake, informed decision-making, predictors of test uptake, psychosocial outcomes (depression, anxiety, stress, decisional conflict and decisional regret) and health economic factors (willingness-to-pay).

The key elements of the study are that all women will receive a purpose-made brochure and genetic counselling before making a decision about testing, the test is optional, convenient and non-invasive and offered at no charge to the participants. Genetic counselling and the field-tested brochure is included in the protocol, as participants in our pilot study and needs assessment indicated that having sufficient information and the chance to discuss it is important in making an informed decision [43, 54]. Offering a test that can be performed at home after sufficient time for decision-making is important, as we found in our pilot study that having to return to the clinic for an invasive test was identified as a barrier to testing, although did allow some time for deliberation [43]. Recruiting pregnant and non-pregnant women will allow us to examine if there are any differences in test uptake, informed choice or psychosocial measures between these groups. Our economic appraisal will provide important information to guide policy on offering carrier screening for FXS.

1  
2  
3  
4  
5  
6  
7  
8  
9  
10  
11  
12  
13  
14  
15  
16  
17  
18  
19  
20  
21  
22  
23  
24  
25  
26  
27  
28  
29  
30  
31  
32  
33  
34  
35  
36  
37  
38  
39  
40  
41  
42  
43  
44  
45  
46  
47  
48  
49  
50  
51  
52  
53  
54  
55  
56  
57  
58  
59  
60

Figure One: Program logic model to investigate FXS carrier screening

For peer review only

1  
2  
3  
4  
5  
6 **Figure Two: Overview of study protocol**  
7  
8  
9  
10  
11  
12  
13  
14  
15  
16  
17  
18  
19  
20  
21  
22  
23  
24  
25  
26  
27  
28  
29  
30  
31  
32  
33  
34  
35  
36  
37  
38  
39  
40  
41  
42  
43  
44  
45  
46  
47  
48  
49  
50  
51  
52  
53  
54  
55  
56  
57  
58  
59  
60

For peer review only

<sup>a</sup> See table 1 for details of measures included in questionnaires 1 and 2

## Settings

The study is being conducted in general practices, public and private obstetric clinics and through private obstetric ultrasound services in Melbourne, Victoria and Perth, Western Australia.

### General Practice

In Australia, women may attend any general practice of their choice, and may attend more than one practice. General practitioners (GPs) are the gatekeepers to access secondary and tertiary care services. About 88% of the Australian population visit a GP at least once a year [56]. Most GP clinics also operate a reminder system for the National Cervical Screening Program, which offers women between the ages of 18 and 69 a cervical (Pap) smear test every two years. Thus most GP clinics have a mail-out system in place to send a reminder letter to their female patients every 2 years. This provides one approach to inviting non-pregnant women into the study and could act as a future service model for population carrier screening.

### Obstetrics

A range of maternity care models exist in Australia but they can be broadly divided into private maternity care, public hospital maternity care and shared local health practitioner/ public hospital maternity care. The first step in accessing maternity care is to attend a GP in early pregnancy to obtain a referral to a private obstetrician or public hospital. The timing of the first appointment with the maternity care provider varies, but in the public hospital system women are often not seen until the second trimester of pregnancy. In 2009, the majority (96.9%) of Australian women gave birth in hospitals and of these, 69.9% (150,157 women) were in the public system and 30.1% (64,771 women) were in the private system [57].

### Obstetric ultrasound – first trimester combined screening

Provision of antenatal screening varies across Australia. In Victoria and Western Australia, first trimester combined screening is available through private pathology laboratories and private ultrasound clinics with some rebate available from the government funded Medicare system, while second trimester screening is state funded. General practitioners or private obstetricians refer women to the private ultrasound clinic for a first trimester nuchal fold thickness scan. In Victoria, about 70% of pregnant women have first trimester combined screening (personal communication, L Bonacquisto, 2013) [58, 59] and so would be expected to attend a private ultrasound practice. In addition to offering testing at initial presentation in primary care, linking FXS carrier screening to first trimester screening is another potential service model.

## Participants

### Enrolling women in the study

Women are eligible to enter the study if they are 18 or over and either not pregnant or up to 12 weeks + 6 days pregnant at the time of recruitment. For non-pregnant women the upper age limit is 70, the age at which participation in the National Cervical Screening Program ends. Women who are unable to speak read and write English are not eligible to enter the study.

Recruitment is occurring in a number of different ways according to the preferences of individual clinics. Non-pregnant women are being recruited from general practice clinics. Women are provided with information about the study either personally (by a researcher, GP, practice nurse or receptionist) or they receive the information through the mail. Study information is not being provided by researchers to women attending general practice clinics who are obviously ill. Pregnant women are being recruited from general practice, private ultrasound and private or public obstetric and ultrasound clinics. In general practice, women are provided with information about the study by the GP when they attend for their pregnancy confirmation appointment. In private ultrasound

1  
2  
3 clinics, study information is provided by clinic reception staff when women attend for their 12 week  
4 scan. In private and public obstetric clinics, women are sent the study information in the mail prior  
5 to their first appointment, or are given the information personally by an obstetrician or midwife.  
6 Women who receive information about the study are asked to complete an expression of interest  
7 which is faxed to the research team, either indicating why they do not wish to take part, or providing  
8 their contact details so they can be recruited by a researcher. All recruitment is completed by the  
9 research team and all women speak with a research genetic counsellor.  
10

#### 11 Enrolling clinics in the study

12 General practice clinics located across the metropolitan areas of Melbourne and Perth are being  
13 targeted to try and achieve a geographical spread and a broad representation of different  
14 socioeconomic areas. General practices with established shared-care programs are being identified  
15 using registered shared care provider lists. Professional networks and an in-house database of GPs  
16 and obstetricians who have previously ordered prenatal carrier testing for FXS or cystic fibrosis in  
17 Victoria is also being used to identify practices that might be interested in participating. We  
18 anticipate requiring 5 general practice, 5 private obstetric and 1 obstetric ultrasound clinic to recruit  
19 the 1000 women needed for the study.  
20  
21

22 Members of the project team are providing academic detailing to clinics involved in recruitment.  
23 Academic detailing covers background information on FXS, the aims of the project and what the  
24 study involves for participants. It is emphasised that the aim of the study is not to test as many  
25 women as possible, but rather to understand what factors influence a woman's decision to accept or  
26 decline carrier testing for FXS. Clinics are provided with project resources, including study brochures  
27 and expression of interest forms.  
28  
29

30 Australian GPs are primarily funded by a fee for service system and receive no government funding  
31 (personal or infrastructure) for involvement in research. Private obstetricians and ultrasound clinics  
32 also receive no government funding for involvement in research. All clinics are being offered a small  
33 amount of remuneration to cover their costs of involvement in the study, depending on the number  
34 of women recruited from their clinic.  
35

#### 36 **Data collection**

37 This research protocol will use mixed-methods data collection that includes genetic testing uptake  
38 and outcomes, questionnaires and interviews.  
39

#### 40 Questionnaires

41 The questionnaires use validated and psychometrically robust self-reported scales. Table 1 shows  
42 which scales are used in questionnaire 1 (Q1), completed after making a decision about carrier  
43 testing for FXS, and questionnaire 2 (Q2), completed one month after returning Q1.  
44  
45  
46  
47  
48  
49  
50  
51  
52  
53  
54  
55  
56  
57  
58  
59  
60

Table One: Questionnaire Measures and Scales

| Measure / Scale                                       | Description                                                                                                                                                                                                                                                                                                                                                                                    | Q1 | Q2 |
|-------------------------------------------------------|------------------------------------------------------------------------------------------------------------------------------------------------------------------------------------------------------------------------------------------------------------------------------------------------------------------------------------------------------------------------------------------------|----|----|
| Knowledge                                             | 10 item scale containing questions on FXS (True/False/Unsure). A score of 7 or higher is classified as 'good' knowledge [55]                                                                                                                                                                                                                                                                   | √  | √  |
| Attitudes                                             | 5 item scale (0-4) used to assess a woman's attitude to screening (beneficial/harmful; important/unimportant, bad thing/good thing, pleasant/unpleasant, worrying/not worrying). Dichotomous scale: women are classified as having a positive (11-20) or a negative (0-10) attitude toward screening [49].                                                                                     | √  |    |
| Multi-dimensional Model of Informed Choice (MMIC)     | Defines an informed choice as a decision made with 'good' knowledge which is consistent with a person's values. Incorporates three dimensions: knowledge, attitudes and uptake. Dichotomous scale: 'informed choice' or 'not informed choice' [49].                                                                                                                                            | √  |    |
| Deliberation                                          | 6 item scale measuring the extent to which a decision is deliberated on a 5 point Likert scale (0 = strongly agree – 4 = strongly disagree). Dichotomous scale: responses below the midpoint (11 or under) classified as not deliberated and those at or above the midpoint as deliberated [53].                                                                                               | √  |    |
| Decisional Conflict Scale                             | 16 item scale measuring uncertainty about a course of action on a 5 point Likert scale (0 = strongly agree – 4 = strongly disagree). Mean scores are reported with higher scores indicating higher decisional conflict. Scores range from 0 to 100 with scores over 37.5 associated with decision delay or uncertainty about implementation [60].                                              | √  |    |
| Depression Anxiety Stress Scale, short form (DASS-21) | 21 item scale divided into 3 subscales measuring depression, anxiety and stress. Responses are classified into 5 categories: 1 (normal) to 5 (extremely severe) [61, 62].                                                                                                                                                                                                                      | √  | √  |
| State Trait Anxiety Index, short form (STAI-6)        | 6 item scale measuring state anxiety. The maximum score is 80 with scores 31-49 considered average and scores over 50 indicating elevated state anxiety [59].                                                                                                                                                                                                                                  | √  | √  |
| Health Belief                                         | 16 items measuring the importance of a range of factors which may influence decision-making: perceived benefits; perceived susceptibility; perceived severity; and perceived barriers; in a woman's decision to accept or decline testing for FXS [47, 63]                                                                                                                                     | √  |    |
| Decisional Regret                                     | 5 item scale measuring distress or remorse after a health care decision using a 5 point Likert scale (0-4). Scores range from 0-100 with higher scores indicating a higher level of regret [64].                                                                                                                                                                                               |    | √  |
| Willingness-to-Pay                                    | 2 questions (piloted) that address WTP and gross family income. Income question has 6 income ranges with tick box. WTP question has 11 item income values with tick box and sub-questions that address: i) utility of test (information only or information plus decision-making); and ii) who receives test result (recipient only or recipient plus shared with health share professionals). | √  |    |
| Socio- demographics                                   | Marital status, age, parity, reproductive life-stage, education, occupation, postcode                                                                                                                                                                                                                                                                                                          | √  |    |

## Interviews

To provide in-depth data on participants' experiences, semi-structured qualitative interviews are being conducted with participants at a number of time-points (See Table Two). Interviews are being conducted by two members of the research team with genetic counselling and qualitative research skills.

**Table Two: Overview of Interview Schedule**

| Time-point                                                | Interview type                               | Interview description                                                                                                                                                                      | Selection                                                                                                                                                                                            |
|-----------------------------------------------------------|----------------------------------------------|--------------------------------------------------------------------------------------------------------------------------------------------------------------------------------------------|------------------------------------------------------------------------------------------------------------------------------------------------------------------------------------------------------|
| After return of Q1, before Q2 and result sent (if tested) | Decision-making interviews                   | Knowledge, attitudes, factors influencing decision-making, the decision-making process, and perspectives on decisions                                                                      | Non-pregnant women only; mix of tested and untested women                                                                                                                                            |
| 1 month after return of Q2                                | Program evaluation interviews (women)        | Motivations for participating, factors influencing decision-making, experience of participating in the study including genetic counselling, reflections on decision and views on screening | Mix of tested and untested women from each clinic, including all women with positive test results. Socio-demographic data examined to ensure selected women are representative of the overall sample |
| After completion of recruitment at any given clinic       | Program evaluation interviews (clinic staff) | Attitudes to population carrier screening for FXS, knowledge of FXS, reflections on offering FXS carrier screening at their clinic, and feedback on the study.                             | Mix of staff from each clinic involved in recruitment                                                                                                                                                |
| 1 year after return of Q2                                 | 1 year follow-up                             | Motivations for screening, interpretation of result, perceived value of result, impact of result and reflections on decision                                                               | All women with a test-positive result (i.e. GZ, PM or FM )                                                                                                                                           |

## Data entry quality control

To ensure accuracy of the questionnaire data, every 20<sup>th</sup> questionnaire entered is being checked prior to analysis. The rate of accuracy will be calculated as the number of errors per number of data items entered. To ensure rigour in the qualitative data analysis, transcripts will be independently coded.

## Testing

1  
2  
3 One of the aims of our study is to evaluate the performance of a new innovative assay specifically  
4 designed for population screening for FXS [65]. Therefore, for the first part of the study, we  
5 collected DNA from a saliva sample (Oragene- DNA collection kit) and carried out the gold standard  
6 two step diagnostic test [8, 66] in parallel with the innovative screening test. The routine FXS  
7 diagnostic test may involve Southern blotting and so can take up to 4 weeks [43]. This is performed  
8 by the Victorian Clinical Genetic Service laboratory. Refinements to the innovative screening assay  
9 [67] mean that we are now able to collect DNA from cheek brush samples and have results available  
10 in one week. This screening assay, marketed by Asuragen, is being performed by Healthscope  
11 Pathology.  
12

13  
14 All women who choose to have carrier testing are being given information about their result based  
15 on current best practice. Women with a result in the normal range receive a letter that includes an  
16 offer to speak to a genetic counsellor at their local clinical service should they require further  
17 information. Women with a test-positive result (GZ, PM or FM) are telephoned and offered face-to-  
18 face genetic counselling at their local clinical genetics service. Genetic counselling for women with  
19 test-positive results follows usual clinical practice [4, 68]. Any pregnant woman found to have a PM  
20 or FM is given her result and, as part of genetic counselling, is offered prenatal diagnostic testing of  
21 the fetus, due to the risk of having a child with FXS. An important outcome of receiving an FXS  
22 carrier result is that relatives can access genetic testing, which may lead to identification of other  
23 carriers and/or the diagnosis of fragile X related disorders in other family members. Genetic testing  
24 is discussed as part of the genetic counselling process and family members are offered genetic  
25 counselling and testing where appropriate.  
26

### 27 28 **Outcomes**

29 The primary outcomes for the study are test uptake and informed choice. Study participants  
30 (denominator) are defined as the number of women recruited into the study who do not actively  
31 withdraw at any point. Test uptake is defined as the number of women accepting testing  
32 (numerator) divided by the number of study participants and will be reported as a percentage.  
33 Informed choice will be reported as the percentage of women in each group (pregnant and non-  
34 pregnant, tested and untested) making an informed choice as measured using the Multi-dimensional  
35 Measure of Informed Choice (MMIC) [62]. MMIC will be measured in Q1 at the time closest to  
36 decision-making. Knowledge, a component of the MMIC, will be measured in Q1 and Q2 and mean  
37 knowledge scores will be reported for each time-point.  
38

39  
40 The study will also examine predictors of test uptake. These multivariate analyses will make use of  
41 socio-demographic, family history, health belief and psychosocial items included in Q1.  
42

43 Psychosocial factors will be examined as secondary measures in this study, including anxiety,  
44 depression and stress. These will be administered in both questionnaires to allow them to be  
45 measured at the time of decision-making and 1 month later. Decisional conflict will be measured in  
46 Q1 and decisional regret in Q2.  
47

48 State anxiety will be reported as the difference in the mean STAI-6 item short form score of women  
49 in each group (pregnant and non-pregnant, tested and untested, normal result versus test positive).  
50 Depression, anxiety and stress will be reported as the mean score of women in each group.  
51 Decisional conflict and decisional regret will be reported as mean scores.  
52

53  
54 In the willingness-to-pay (WTP) literature there is keen interest in how WTP dollar values for  
55 information may vary in accordance with intended use, who receives the information and capacity-  
56 to-pay. Our questions have been designed to address these key issues. Accordingly, WTP data will  
57 be reported in a number of ways: i) intended use ('information only' and/or 'decision-making –  
58  
59  
60



1  
2  
3 personal or medical’); ii) by recipients of information (‘women only’ or ‘women plus health care  
4 professionals’); iii) for women in the trial as a whole and for each group (pregnant and non-  
5 pregnant, tested and untested, normal result versus test positive); as mean dollar values together  
6 with associated ranges around each mean to facilitate sensitivity testing.  
7

### 8 9 Sample size

10 In our pilot study, in which women were required to return on a separate occasion to give a blood  
11 sample, test uptake in non-pregnant women was 20%, although 50% indicated they intended to be  
12 tested [43]. Based on the relevance to reproductive life-stage, we expect test uptake in the  
13 pregnant group to be greater than in the non-pregnant group. Our minimum sample size of 500  
14 women per group will give us 88% power to detect a difference of 10% in test uptake between  
15 groups (50% v 40% or 50% vs 60%). We have less information about the likely percentage of women  
16 making an informed choice. If the percentage is 50%, with a minimum sample size of 500 per group  
17 an unadjusted analysis would have 87% power to detect a difference of 10% (i.e. 50% vs 40% or 50%  
18 vs 60%) between groups. If the base rate is greater than or less than 50% we would have >87%  
19 power to detect a difference of 10%. The study will therefore be sufficiently powered to exclude  
20 anything other than small percentage differences between groups.  
21

### 22 23 Proposed analysis

24 Descriptive statistics will be used to describe the socio-demographic, knowledge, attitudes and  
25 psychological characteristics of the sample. To compare uptake of testing by pregnant and non-  
26 pregnant women, a multivariate logistic regression model with uptake as the dependent variable,  
27 and socio-demographic variables such as age, education and parity, together with pregnant/non-  
28 pregnant status and mode of recruitment as the independent variables, will be estimated. This will  
29 ensure that a difference in uptake is not due to differences in socio-economic composition of the  
30 pregnant and non-pregnant samples. Robust standard errors will be estimated to take into account  
31 the possible effect of clustering due to recruitment methods. Odds ratios will be transformed back  
32 to percentage differences [69]. A similar analysis will be performed to compare informed choice. To  
33 investigate predictors of uptake of testing, a multivariate logistic regression model will be estimated  
34 with independent variables including: informed choice, attitudes, number of children, prior  
35 awareness of FXS, psychosocial variables, family history of intellectual disability, age and education.  
36 Interactions between predictors and pregnancy/non-pregnancy will be examined, and if necessary,  
37 separate models will be estimated for pregnant and non-pregnant women.  
38

39  
40 Interviews are transcribed verbatim and NVivo 10 (QSR International, Australia) is being used to  
41 manage the data and facilitate coding. Coding is being done by at least two independent  
42 researchers to provide rigour of analysis. The decision-making interviews are being examined using  
43 content and thematic analysis. These interviews occur between the return of Q1 and the issuing of  
44 results (for tested women) and Q2. As such they involve only non-pregnant women, as we were  
45 concerned that an interview at this time before receiving a result, or needing to delay sending out  
46 the result prior to the interview, could be distressing for pregnant women at a time when they might  
47 be vulnerable. Data from the post-Q2 interviews are being analysed using directed content analysis  
48 [70]. The coding framework has been developed using data from the needs assessment phase of the  
49 study [43, 47, 54]. As little prior research has explored the experiences of women identified as  
50 carrying GZ, PM or FM alleles through population-based carrier screening, or the experiences of staff  
51 in clinics offering population carrier screening, the interviews will be analysed thematically. This will  
52 involve an iterative process where data are coded, compared, contrasted and refined to generate  
53 emergent themes [71] using an approach we have described previously [54].  
54  
55

56 The economic analysis is matched to the stages of FXS carrier screening described in our program  
57 logic model (Figure One). At this stage the analysis is concerned with examining stage 3 (program  
58  
59  
60

1  
2  
3 implementation) and stage 4 (short-term outcomes). Placing a dollar value on the health and non-  
4 health outcomes of FXS screening is complex. The immediate result of FXS screening is information.  
5 That information might be about a risk to a fetus the women is carrying, implications for the  
6 women's future health, or implications for the woman's future reproductive health and reproductive  
7 choices. It is for this reason that we have started with willingness-to-pay (WTP) methods to explore  
8 the value that individuals place on the information provided. The WTP data will be analysed in  
9 accordance with the intervention design and policy issues set out above. The WTP data will also be  
10 analysed to see if there is an association between the dollar values and preparedness to undergo  
11 testing. Similarly, to the extent feasible, the relationship between socio-demographic variables and  
12 WTP will be analysed to see if these variables impact on WTP.  
13

14  
15 Longer-term economic modelling using a surrogate is planned for Stage 5. We aim to go on to  
16 record the actions that the women undertake as a result of their test results and the incidence of  
17 births of babies with FXS to women in the study, discussion of test results with family and  
18 identification of carriers/affected individuals with cascade testing. This will facilitate full economic  
19 appraisal using a range of methods, including discrete choice experiments (DCE). DCE has  
20 applicability to this field because non-health outcomes and process attributes are also important,  
21 and DCE is a logical extension to the WTP for inclusion in Stage 5.  
22  
23

## 24 ETHICS AND DISSEMINATION

### 25 Ethics

26  
27 Ethics approval to conduct this study has been granted by the Human Research Ethics Committees of  
28 the Universities of Melbourne (HREC 0830733) and Western Australia (RA/4/1/4028). Additionally,  
29 approval has been granted by the ethics committees of the following recruitment sites: Family  
30 Planning Victoria (09/2); Women's and Newborn Health Service and Charles Gardiner Hospital – King  
31 Edward Memorial Hospital (1925/EW); Swan Kalamunda Health Service (2012-160). This project is  
32 being carried out according to the National Statement on Ethical Conduct in Human Research (2007)  
33 and the Australian Code for the Responsible Conduct of Research (2007) produced by the National  
34 Health and Medical Research Council of Australia. A plain language statement is provided to all  
35 women and to clinics and health professionals involved in recruiting women for the study and a  
36 signed consent form is obtained from all participants at the time of recruitment.  
37  
38

### 39 Steering group and advisory committee

40 This study has a designated research team and an advisory group. The advisory group includes  
41 representation from the Victorian Department of Health, the Fragile X Association of Australia and  
42 clinicians involved in the study. This group meets annually. The research team includes expertise in  
43 population health, genetics, primary care, epidemiology, FXS, health economics, pathology and  
44 psychology, with the full team meeting quarterly.  
45  
46

### 47 Dissemination

48 This study will be the first of its kind worldwide to address informed decision-making in carrier  
49 screening for FXS and to compare screening in pregnant and non-pregnant women. It will inform  
50 appropriate clinic service models for offering FXS screening and will provide important exploratory  
51 health economic data. We expect to publish one main trial outcome paper and a number of  
52 additional papers exploring aspects of the data in more detail. We will also present our findings at a  
53 number of international conferences. A report outlining the main findings of the study will also be  
54 made available on the study website [www.fragilexscreening.net.au](http://www.fragilexscreening.net.au) on completion. The findings of  
55 this study will inform policy development about when and how to offer population carrier screening  
56 for FXS.  
57  
58  
59  
60

**Funding statement**

This work was supported by a National Health and Medical Research Council project grant [607320] and the Victorian Government's Operational Infrastructure Support Program. Funding was also received from the Shepherd Foundation, Helen Macpherson Smith Trust, the Apex Foundation, the Fragile X Alliance Inc, and theme funding from the Murdoch Childrens Research Institute.

**Contributorship statement**

Dr M Martyn led the writing of the manuscript and co-ordinates the study.

Dr A Archibald contributed to study design, ethics application, data collection and drafting of manuscript.

Prof V Anderson contributed to the design of the study and advised on management of women with high DASS and STAI scores

Prof R Carter and Ms S Younie were the health economists involved in the NHMRC project grant, prepared the text on the WTP analysis and associated economic appraisal and read/approved the manuscript.

Dr J Cohen contributed to the initial development of the project concept, provided input to the development of tools used in project, assisted with site selection, and provided relevant input to the manuscript.

Prof M Delatycki contributed to the design of the study

A/Prof Donath was involved in the study design and is responsible for the sample size calculations and the statistical analysis.

Prof J Emery contributed to study design, conduct of study in WA and drafting of this manuscript.

A/Prof J Halliday was involved in the study design and contributed to the drafting of the manuscript.

Dr M Hill provided critical input into the design and set-up of the study, as well as study materials.

Dr L Sheffield contributed to the initial development of the project concept and was involved in the design of the study.

A/Prof H Slater contributed to the design of the study and provided oversight of the diagnostic FXS testing.

Prof F Tassone designed a test for FXS which makes it possible to offer population carrier screening .

Prof S Metcalfe was responsible for the overall design of the study, study materials and contributed to the drafting of this manuscript.

**Competing interest**

There are no competing interests.

## REFERENCES

1. Godard B, Leo ten K, Evers-Kiebooms G, et al. Population genetic screening programmes: principles, techniques, practices, and policies. *Eur J Hum Genet* 2003;**11**:S49-S87.
2. Teutsch SM, Bradley LA, Palomaki GE, et al. The Evaluation of Genomic Applications in Practice and Prevention (EGAPP) Initiative: methods of the EGAPP Working Group. *Genet Med* 2009;**11**(1):3-14.
3. Hill MK, Archibald AD, Cohen J, bmjopen-2013-003660.R1. A systematic review of population screening for fragile X syndrome. *Genet Med* 2010;**12**(7):396-410.
4. Finucane B, Abrams L, Cronister A, et al. Genetic counseling and testing for FMR1 gene mutations: practice guidelines of the national society of genetic counselors. *J Genet Couns* 2012;**21**(6):752-60.
5. Pieretti M, Zhang FP, Fu YH, et al. Absence of expression of the FMR-1 gene in fragile X syndrome. *Cell* 1991;**66**(4):817-22.
6. Verkerk AJ, Pieretti M, Sutcliffe JS, et al. Identification of a gene (FMR-1) containing a CGG repeat coincident with a breakpoint cluster region exhibiting length variation in fragile X syndrome. *Cell* 1991;**65**(5):905-14.
7. Bell MV, Hirst MC, Nakahori Y, et al. Physical mapping across the fragile X: hypermethylation and clinical expression of the fragile X syndrome. *Cell* 1991;**64**(4):861-6.
8. Fu YH, Kuhl DP, Pizzuti A, et al. Variation of the CGG repeat at the fragile X site results in genetic instability: resolution of the Sherman paradox. *Cell* 1991;**67**(6):1047-58.
9. Yu S, Mulley J, Loesch D, et al. Fragile-X syndrome: unique genetics of the heritable unstable element. *Am J Hum Genet* 1992;**50**(5):968-80.
10. HGSA. Best Practice Fragile X Testing and Analysis Guidelines for Australasian Laboratories, 2012.

- 1  
2  
3 11. Kronquist KE, Sherman SL, Spector EB. Clinical significance of tri-nucleotide repeats in Fragile X  
4  
5 testing: a clarification of American College of Medical Genetics guidelines. *Genet Med*  
6  
7 2008;**10**(11):845-7.  
8
- 9  
10 12. Berkenstadt M, Ries-Levavi L, Cuckle H, et al. Preconceptional and prenatal screening for fragile X  
11  
12 syndrome: experience with 40,000 tests. *Prenat Diagn* 2007;**27**(11):991-4.  
13
- 14 13. Nolin SL, Lewis FA, 3rd, Ye LL, et al. Familial transmission of the FMR1 CGG repeat. *Am J Hum*  
15  
16 *Genet* 1996;**59**(6):1252-61.  
17
- 18 14. Cornish K, Turk J, Hagerman R. The fragile X continuum: new advances and perspectives. *J*  
19  
20 *Intellect Disabil Res* 2008;**52**(Pt 6):469-82.  
21
- 22 15. Hagerman R, Hagerman P. *Fragile X syndrome: diagnosis, treatment, and research*. Baltimore:  
23  
24 Johns Hopkins University Press, 2002.  
25
- 26 16. Davids JR, Hagerman RJ, Eilert RE. Orthopaedic aspects of fragile-X syndrome. *J Bone Joint Surg*  
27  
28 *Am* 1990;**72**(6):889-96.  
29
- 30 17. Hagerman RJ, Altshul-Stark D, McBogg P. Recurrent otitis media in the fragile X syndrome. *Am J*  
31  
32 *Dis Child* 1987;**141**(2):184-7.  
33
- 34 18. Hatton DD, Buckley E, Lachiewicz A, et al. Ocular status of boys with fragile X syndrome: a  
35  
36 prospective study. *J AAPOS* 1998;**2**(5):298-302.  
37
- 38 19. Wirojanan J, Jacquemont S, Diaz R, et al. The efficacy of melatonin for sleep problems in children  
39  
40 with autism, fragile X syndrome, or autism and fragile X syndrome. *J Clin Sleep Med*  
41  
42 2009;**5**(2):145-50.  
43
- 44 20. Hagerman RJ, Berry-Kravis E, Kaufmann WE, et al. Advances in the treatment of fragile X  
45  
46 syndrome. *Pediatrics* 2009;**123**(1):378-90.  
47
- 48 21. Rueda JR, Ballesteros J, Tejada MI. Systematic review of pharmacological treatments in fragile X  
49  
50 syndrome. *BMC Neurol* 2009;**9**:53.  
51  
52  
53  
54  
55  
56  
57  
58  
59  
60

- 1  
2  
3 22. Berry-Kravis EM, Hessler D, Rathmell B, et al. Effects of STX209 (arbaclofen) on neurobehavioral  
4 function in children and adults with fragile X syndrome: a randomized, controlled, phase 2  
5 trial. *Sci Transl Med* 2012;**4**(152):152ra27.  
6  
7  
8  
9 23. Jacquemont S, Curie A, des Portes V, et al. Epigenetic modification of the FMR1 gene in fragile X  
10 syndrome is associated with differential response to the mGluR5 antagonist AFQ056. *Sci*  
11 *Transl Med* 2011;**3**(64):64ra1.  
12  
13  
14 24. Paribello C, Tao L, Folino A, et al. Open-label add-on treatment trial of minocycline in fragile X  
15 syndrome. *BMC Neurol* 2010;**10**:91.  
16  
17  
18 25. Kesler SR, Lightbody AA, Reiss AL. Cholinergic dysfunction in fragile X syndrome and potential  
19 intervention: a preliminary 1H MRS study. *Am J Med Genet* 2009;**149A**(3):403-7.  
20  
21  
22 26. Schwartz CE, Dean J, Howard-Peebles PN, et al. Obstetrical and gynecological complications in  
23 fragile X carriers: A multicenter study. *Am J Med Genet* 1994;**51**(4):400-02.  
24  
25  
26 27. Allingham-Hawkins DJ, Babul-Hirji R, Chitayat D, et al. Fragile X premutation is a significant risk  
27 factor for premature ovarian failure: the International Collaborative POF in Fragile X study--  
28 preliminary data. *Am J Med Genet* 1999;**83**(4):322-5.  
29  
30  
31 28. Sherman SL. Premature ovarian failure in the fragile X syndrome. *Am J Med Genet*  
32 2000;**97**(3):189-94.  
33  
34  
35 29. Rodriguez-Revenga L, Madrigal I, Pagonabarraga J, et al. Penetrance of FMR1 premutation  
36 associated pathologies in fragile X syndrome families. *Eur J Hum Genet* 2009;**17**(10):1359-62.  
37  
38  
39 30. Hagerman RJ, Leehey M, Heinrichs W, et al. Intention tremor, parkinsonism, and generalized  
40 brain atrophy in male carriers of fragile X. *Neurology* 2001;**57**(1):127-30.  
41  
42  
43 31. Jacquemont S, Hagerman RJ, Leehey M, et al. Fragile X premutation tremor/ataxia syndrome:  
44 molecular, clinical, and neuroimaging correlates. *Am J Hum Genet* 2003;**72**(4):869-78.  
45  
46  
47 32. Coffee B, Keith K, Albizua I, et al. Incidence of fragile X syndrome by newborn screening for  
48 methylated FMR1 DNA. *Am J Hum Genet* 2009;**85**(4):503-14.  
49  
50  
51  
52  
53  
54  
55  
56  
57  
58  
59  
60

- 1  
2  
3 33. Fernandez-Carvajal I, Walichiewicz P, Xiaosen X, et al. Screening for expanded alleles of the FMR1  
4 gene in blood spots from newborn males in a Spanish population. *J Mol Diagn*  
5 2009;**11**(4):324-9.  
6  
7  
8  
9 34. Levesque S, Dombrowski C, Morel ML, et al. Screening and instability of FMR1 alleles in a  
10 prospective sample of 24,449 mother-newborn pairs from the general population. *Clin*  
11 *Genet* 2009;**76**(6):511-23.  
12  
13  
14 35. Hantash FM, Goos DM, Crossley B, et al. FMR1 premutation carrier frequency in patients  
15 undergoing routine population-based carrier screening: insights into the prevalence of  
16 fragile X syndrome, fragile X-associated tremor/ataxia syndrome, and fragile X-associated  
17 primary ovarian insufficiency in the United States. *Genet Med* 2011;**13**(1):39-45.  
18  
19  
20 36. Tassone F, Long KP, Tong TH, et al. FMR1 CGG allele size and prevalence ascertained through  
21 newborn screening in the United States. *Genome Med* 2012;**4**(12):100.  
22  
23  
24 37. Spence WC, Black SH, Fallon L, et al. Molecular fragile X screening in normal populations. *Am J*  
25 *Med Genet* 1996;**64**(1):181-3.  
26  
27  
28 38. Pessa R, Berkenstadt M, Cuckle H, et al. Screening for fragile X syndrome in women of  
29 reproductive age. *Prenat Diagn* 2000;**20**(8):611-4.  
30  
31  
32 39. Ryyanen M, Heinonen S, Makkonen M, et al. Feasibility and acceptance of screening for fragile  
33 X mutations in low-risk pregnancies. *Eur J Hum Genet* 1999;**7**(2):212-6.  
34  
35  
36 40. Toledano-Alhadeif H, Basel-Vanagaite L, Magal N, et al. Fragile-X carrier screening and the  
37 prevalence of premutation and full-mutation carriers in Israel. *Am J Hum Genet*  
38 2001;**69**(2):351-60.  
39  
40  
41 41. Cronister A, DiMaio M, Mahoney MJ, et al. Fragile X syndrome carrier screening in the prenatal  
42 genetic counseling setting. *Genet Med* 2005;**7**(4):246-50.  
43  
44  
45 42. Anido A, Carlson LM, Taft L, et al. Women's attitudes toward testing for fragile X carrier status: a  
46 qualitative analysis. *J Genet Couns* 2005;**14**(4):295-306.  
47  
48  
49  
50  
51  
52  
53  
54  
55  
56  
57  
58  
59  
60



- 1  
2  
3 43. Metcalfe S, Jacques A, Archibald A, et al. A model for offering carrier screening for fragile X  
4  
5 syndrome to nonpregnant women: results from a pilot study. *Genet Med* 2008;**10**(7):525-35.  
6  
7 44. Geva E, Yaron Y, Shomrat R, et al. The risk of fragile X premutation expansion is lower in carriers  
8  
9 detected by general prenatal screening than in carriers from known fragile X families. *Genet*  
10  
11 *Test* 2000;**4**(3):289-92.  
12  
13 45. Fanos JH, Spangner KA, Musci TJ. Attitudes toward prenatal screening and testing for Fragile X.  
14  
15 *Genet Med* 2006;**8**(2):129-33.  
16  
17 46. Musci TJ, Caughey AB. Cost-effectiveness analysis of prenatal population-based fragile X carrier  
18  
19 screening. *Am J Obstet Gynecol* 2005;**192**(6):1905-12.  
20  
21 47. Archibald AD, Jaques AM, et al. "It's something I need to consider": Decisions about carrier  
22  
23 screening for fragile X syndrome in a population of non-pregnant women. *Am J Med Genet A*  
24  
25 2009;**149A**(12):2731-8.  
26  
27 48. Bekker H, Thornton JG, Airey CM, et al. Informed decision making: an annotated bibliography  
28  
29 and systematic review. *Health Technol Assess* 1999;**3**(1):1-156.  
30  
31 49. Marteau TM, Dormandy E, Michie S. A measure of informed choice. *Health Expect* 2001;**4**(2):99-  
32  
33 108.  
34  
35 50. Jaques AM, Halliday JL, Bell RJ. Do women know that prenatal testing detects fetuses with Down  
36  
37 syndrome? *J Obstet Gynaecol* 2004;**24**(6):647-51.  
38  
39 51. Jaques AM, Sheffield LJ, Halliday JL. Informed choice in women attending private clinics to  
40  
41 undergo first-trimester screening for Down syndrome. *Prenat Diagn* 2005;**25**(8):656-64.  
42  
43 52. Rowe HJ, Fisher JR, Quinlivan JA. Are pregnant Australian women well informed about prenatal  
44  
45 genetic screening? A systematic investigation using the Multidimensional Measure of  
46  
47 Informed Choice. *Aust N Z J Obstet Gynaecol* 2006;**46**(5):433-9.  
48  
49 53. van den Berg M, Timmermans DR, ten Kate LP, et al. Informed decision-making in the context of  
50  
51 prenatal screening. *Patient Educ Couns* 2006;**63**(1-2):110-7.  
52  
53  
54  
55  
56  
57  
58  
59  
60



- 1  
2  
3 54. Archibald AD, Hickerton CL, Jaques AM, et al. "It's about having the choice": stakeholder  
4  
5 perceptions of population-based genetic carrier screening for fragile X syndrome. *Am J Med*  
6  
7 *Genet A* 2013;**161A**(1):48-58.  
8
- 9 55. Ames AG, Jaques A, Ukoumunne OC, et al. Development of a fragile X syndrome (FXS) knowledge  
10  
11 scale: towards a modified multidimensional measure of informed choice for FXS population  
12  
13 carrier screening. *Health Expect* Published Online First: 2012/10/17. doi:10.1111/hex.12009  
14  
15
- 16 56. Britt H, Miller G, editors. General practice in Australia, health priorities and policies 1998 to 2008.  
17  
18 Canberra: Australian Institute of Health and Welfare and the University of Sydney, 2009.  
19
- 20 57. Li Z, McNally L, Hilder L, EA S. Australia's mothers and babies 2009. Perinatal statistics series no.  
21  
22 25. Cat. no. PER 52. Sydney: Australian Institute of Health and Welfare National Perinatal  
23  
24 Epidemiology and Statistics Unit, 2011.  
25
- 26 58. Breheny N, O'Leary P, Dickinson J, et al. Statewide evaluation of first trimester screening for  
27  
28 Down syndrome and other fetal anomalies in Western Australia. *Genomics Occasional Paper*  
29  
30 5.: Prenatal Diagnosis Committee Department of Health Western Australia, 2005.  
31  
32
- 33 59. Marteau TM, Bekker H. The development of a six-item short-form of the state scale of the  
34  
35 Spielberger State-Trait Anxiety Inventory (STAI). *Br J Clin Psychol* 1992;**31 ( Pt 3)**:301-6.  
36  
37
- 38 60. O'Connor A. User Manual – Decisional Conflict Scale (16 item statement format). Ottawa: Ottawa  
39  
40 Hospital Research Institute;  
41  
42 doi:[http://decisionaid.ohri.ca/docs/develop/User\\_Manuals/UM\\_Decisional\\_Conflict.pdf](http://decisionaid.ohri.ca/docs/develop/User_Manuals/UM_Decisional_Conflict.pdf)  
43
- 44 61. Crawford JR, Henry JD. The Depression Anxiety Stress Scales (DASS): normative data and latent  
45  
46 structure in a large non-clinical sample. *Br J Clin Psychol* 2003;**42**(Pt 2):111-31.  
47
- 48 62. Lovibond SH, Lovibond PF. Manual for the Depression Anxiety Stress Scales (2nd. Ed.) Sydney:  
49  
50 Psychology Foundation, 1995.  
51
- 52 63. Janz NK, Becker MH. The Health Belief Model: a decade later. *Health Educ Q* 1984;**11**(1):1-47.  
53
- 54 64. O'Connor A. User Manual – Decision Regret Scale. Ottawa: Ottawa Hospital Research Institute  
55  
56 doi: [http://decisionaid.ohri.ca/docs/develop/User\\_Manuals/UM\\_Regret\\_Scale.pdf](http://decisionaid.ohri.ca/docs/develop/User_Manuals/UM_Regret_Scale.pdf)  
57  
58  
59  
60

- 1  
2  
3 65. Tassone F, Pan R, Amiri K, et al. A rapid polymerase chain reaction-based screening method for  
4  
5 identification of all expanded alleles of the fragile X (FMR1) gene in newborn and high-risk  
6  
7 populations. *J Mol Diagn* 2008;**10**(1):43-9.  
8
- 9 66. Khaniani MS, Kalitsis P, Burgess T, et al. An improved Diagnostic PCR Assay for identification of  
10  
11 Cryptic Heterozygosity for CGG Triplet Repeat Alleles in the Fragile X Gene (FMR1). *Mol*  
12  
13 *Cytogenet* 2008;**1**(1):5.  
14
- 15 67. Chen L, Hadd A, Sah S, et al. An information-rich CGG repeat primed PCR that detects the full  
16  
17 range of fragile X expanded alleles and minimizes the need for southern blot analysis. *J Mol*  
18  
19 *Diagn* 2010;**12**(5):589-600.  
20
- 21 68. McConkie-Rosell A, Finucane B, Cronister A, et al. Genetic counseling for fragile x syndrome:  
22  
23 updated recommendations of the national society of genetic counselors. *J Genet Couns*  
24  
25 2005;**14**(4):249-70.  
26
- 27 69. Localio AR, Margolis DJ, Berlin JA. Relative risks and confidence intervals were easily computed  
28  
29 indirectly from multivariable logistic regression. *J Clin Epidemiol* 2007;**60**(9):874-82.  
30
- 31 70. Hsieh HF, Shannon SE. Three approaches to qualitative content analysis. *Qual Health Res*  
32  
33 2005;**15**(9):1277-88.  
34
- 35 71. Charmaz K. *Constructing grounded theory: A practical guide through qualitative analysis*. Los  
36  
37 Angeles: Sage, 2006.  
38  
39  
40  
41  
42  
43  
44  
45  
46  
47  
48  
49  
50  
51  
52  
53  
54  
55  
56  
57  
58  
59  
60

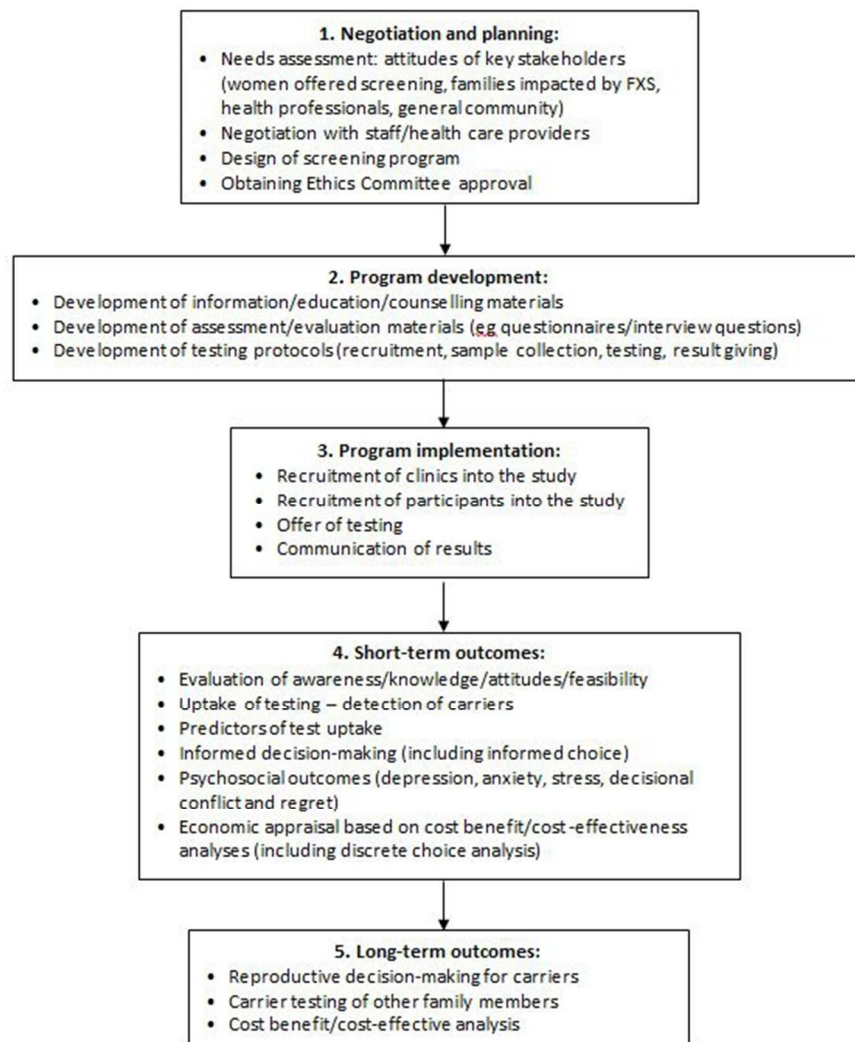

Figure One: Program logic model to investigate FXS carrier screening  
170x190mm (96 x 96 DPI)

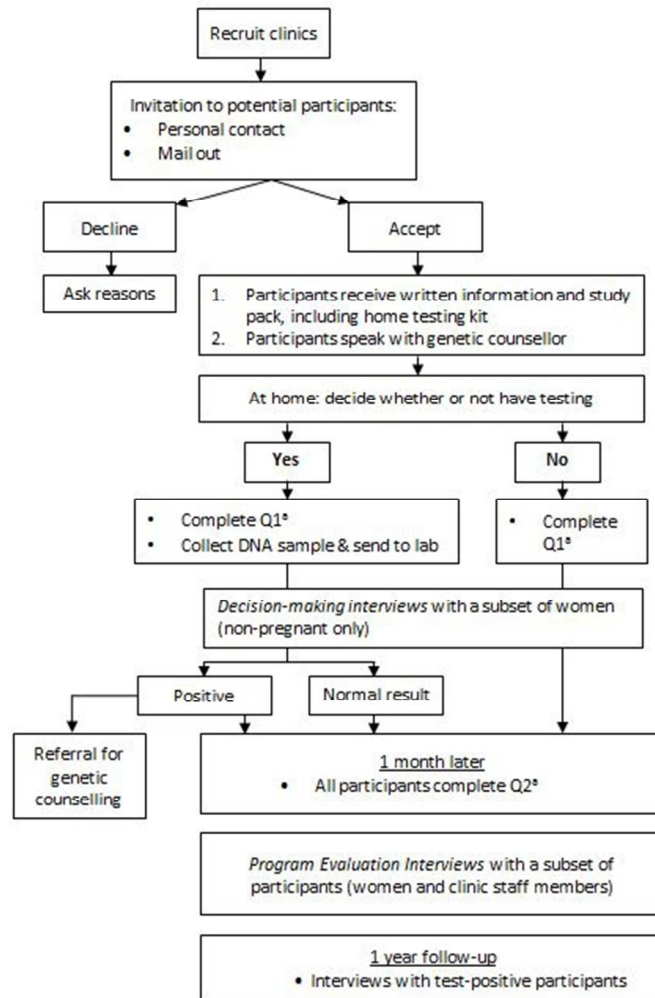

§ See table 1 for details of measures included in questionnaires 1 and 2

Figure Two: Overview of study protocol  
168x185mm (96 x 96 DPI)

## STROBE Statement—checklist of items that should be included in reports of observational studies

|                           | Item No | Recommendation                                                                                                                                                                                                                                                                                                                                                                                                                                                         | Check              |
|---------------------------|---------|------------------------------------------------------------------------------------------------------------------------------------------------------------------------------------------------------------------------------------------------------------------------------------------------------------------------------------------------------------------------------------------------------------------------------------------------------------------------|--------------------|
| <b>Title and abstract</b> | 1       | (a) Indicate the study's design with a commonly used term in the title or the abstract                                                                                                                                                                                                                                                                                                                                                                                 | X                  |
|                           |         | (b) Provide in the abstract an informative and balanced summary of what was done and what was found                                                                                                                                                                                                                                                                                                                                                                    | X                  |
| <b>Introduction</b>       |         |                                                                                                                                                                                                                                                                                                                                                                                                                                                                        |                    |
| Background/rationale      | 2       | Explain the scientific background and rationale for the investigation being reported                                                                                                                                                                                                                                                                                                                                                                                   | X                  |
| Objectives                | 3       | State specific objectives, including any prespecified hypotheses                                                                                                                                                                                                                                                                                                                                                                                                       | X                  |
| <b>Methods</b>            |         |                                                                                                                                                                                                                                                                                                                                                                                                                                                                        |                    |
| Study design              | 4       | Present key elements of study design early in the paper                                                                                                                                                                                                                                                                                                                                                                                                                | X                  |
| Setting                   | 5       | Describe the setting, locations, and relevant dates, including periods of recruitment, exposure, follow-up, and data collection                                                                                                                                                                                                                                                                                                                                        | X                  |
| Participants              | 6       | (a) <i>Cohort study</i> —Give the eligibility criteria, and the sources and methods of selection of participants. Describe methods of follow-up<br><i>Case-control study</i> —Give the eligibility criteria, and the sources and methods of case ascertainment and control selection. Give the rationale for the choice of cases and controls<br><i>Cross-sectional study</i> —Give the eligibility criteria, and the sources and methods of selection of participants | X                  |
|                           |         | (b) <i>Cohort study</i> —For matched studies, give matching criteria and number of exposed and unexposed<br><i>Case-control study</i> —For matched studies, give matching criteria and the number of controls per case                                                                                                                                                                                                                                                 |                    |
| Variables                 | 7       | Clearly define all outcomes, exposures, predictors, potential confounders, and effect modifiers. Give diagnostic criteria, if applicable                                                                                                                                                                                                                                                                                                                               | X                  |
| Data sources/measurement  | 8*      | For each variable of interest, give sources of data and details of methods of assessment (measurement). Describe comparability of assessment methods if there is more than one group                                                                                                                                                                                                                                                                                   | X                  |
| Bias                      | 9       | Describe any efforts to address potential sources of bias                                                                                                                                                                                                                                                                                                                                                                                                              | X                  |
| Study size                | 10      | Explain how the study size was arrived at                                                                                                                                                                                                                                                                                                                                                                                                                              | X                  |
| Quantitative variables    | 11      | Explain how quantitative variables were handled in the analyses. If applicable, describe which groupings were chosen and why                                                                                                                                                                                                                                                                                                                                           | not yet applicable |
| Statistical methods       | 12      | (a) Describe all statistical methods, including those used to control for confounding                                                                                                                                                                                                                                                                                                                                                                                  | X                  |
|                           |         | (b) Describe any methods used to examine subgroups and interactions                                                                                                                                                                                                                                                                                                                                                                                                    | X                  |
|                           |         | (c) Explain how missing data were addressed                                                                                                                                                                                                                                                                                                                                                                                                                            | not yet applicable |
|                           |         | (d) <i>Cohort study</i> —If applicable, explain how loss to follow-up was addressed<br><i>Case-control study</i> —If applicable, explain how matching of cases and controls was addressed<br><i>Cross-sectional study</i> —If applicable, describe analytical methods                                                                                                                                                                                                  | not yet applicable |

|                          |     | taking account of sampling strategy                                                                                                                                                                          |                    |
|--------------------------|-----|--------------------------------------------------------------------------------------------------------------------------------------------------------------------------------------------------------------|--------------------|
|                          |     | (e) Describe any sensitivity analyses                                                                                                                                                                        | not yet applicable |
| <b>Results</b>           |     |                                                                                                                                                                                                              | <b>Check</b>       |
| Participants             | 13* | (a) Report numbers of individuals at each stage of study—eg numbers potentially eligible, examined for eligibility, confirmed eligible, included in the study, completing follow-up, and analysed            | not yet applicable |
|                          |     | (b) Give reasons for non-participation at each stage                                                                                                                                                         | not yet applicable |
|                          |     | (c) Consider use of a flow diagram                                                                                                                                                                           | X                  |
| Descriptive data         | 14* | (a) Give characteristics of study participants (eg demographic, clinical, social) and information on exposures and potential confounders                                                                     | not yet applicable |
|                          |     | (b) Indicate number of participants with missing data for each variable of interest                                                                                                                          | not yet applicable |
|                          |     | (c) <i>Cohort study</i> —Summarise follow-up time (eg, average and total amount)                                                                                                                             | not yet applicable |
| Outcome data             | 15* | <i>Cohort study</i> —Report numbers of outcome events or summary measures over time                                                                                                                          | not yet applicable |
|                          |     | <i>Case-control study</i> —Report numbers in each exposure category, or summary measures of exposure                                                                                                         |                    |
|                          |     | <i>Cross-sectional study</i> —Report numbers of outcome events or summary measures                                                                                                                           |                    |
| Main results             | 16  | (a) Give unadjusted estimates and, if applicable, confounder-adjusted estimates and their precision (eg, 95% confidence interval). Make clear which confounders were adjusted for and why they were included | not yet applicable |
|                          |     | (b) Report category boundaries when continuous variables were categorized                                                                                                                                    | not yet applicable |
|                          |     | (c) If relevant, consider translating estimates of relative risk into absolute risk for a meaningful time period                                                                                             | not yet applicable |
| Other analyses           | 17  | Report other analyses done—eg analyses of subgroups and interactions, and sensitivity analyses                                                                                                               | not yet applicable |
| <b>Discussion</b>        |     |                                                                                                                                                                                                              |                    |
| Key results              | 18  | Summarise key results with reference to study objectives                                                                                                                                                     | not yet applicable |
| Limitations              | 19  | Discuss limitations of the study, taking into account sources of potential bias or imprecision. Discuss both direction and magnitude of any potential bias                                                   | not yet applicable |
| Interpretation           | 20  | Give a cautious overall interpretation of results considering objectives, limitations, multiplicity of analyses, results from similar studies, and other relevant evidence                                   | not yet applicable |
| Generalisability         | 21  | Discuss the generalisability (external validity) of the study results                                                                                                                                        | not yet applicable |
| <b>Other information</b> |     |                                                                                                                                                                                                              |                    |
| Funding                  | 22  | Give the source of funding and the role of the funders for the present study and, if applicable, for the original study on which the present article is based                                                | X                  |

1  
2 \*Give information separately for cases and controls in case-control studies and, if applicable, for exposed and  
3 unexposed groups in cohort and cross-sectional studies.  
4

5  
6 **Note:** An Explanation and Elaboration article discusses each checklist item and gives methodological background and  
7 published examples of transparent reporting. The STROBE checklist is best used in conjunction with this article (freely  
8 available on the Web sites of PLoS Medicine at <http://www.plosmedicine.org/>, Annals of Internal Medicine at  
9 <http://www.annals.org/>, and Epidemiology at <http://www.epidem.com/>). Information on the STROBE Initiative is  
10 available at [www.strobe-statement.org](http://www.strobe-statement.org).  
11  
12  
13  
14  
15  
16  
17  
18  
19  
20  
21  
22  
23  
24  
25  
26  
27  
28  
29  
30  
31  
32  
33  
34  
35  
36  
37  
38  
39  
40  
41  
42  
43  
44  
45  
46  
47  
48  
49  
50  
51  
52  
53  
54  
55  
56  
57  
58  
59  
60

## TITLE PAGE

'Offering fragile X syndrome carrier screening: a prospective mixed-methods observational study comparing carrier screening of pregnant and non-pregnant women in the general population'

Short title: ~~The fragile X syndrome carrier screening~~ (FaXeS) study in the general population

## Corresponding author:

Prof Sylvia Metcalfe  
Genetics Education and Health Research  
Murdoch Childrens Research Institute  
Royal Childrens Hospital  
Flemington Rd  
Parkville  
VIC 3052  
AUSTRALIA  
E: Sylvia.metcalfe@mcri.edu.au  
T: +61 3 8341 6309  
F: +61 3 8341 6207

## Authors:

M Martyn<sup>1</sup>, V Anderson<sup>1,2,3</sup>, A Archibald<sup>1,3,4</sup>, R Carter<sup>5</sup>, J Cohen<sup>6</sup>, M Delatycki<sup>1,7</sup>, S Donath<sup>1,3</sup>, J Emery<sup>8</sup>, J Halliday<sup>1,3</sup>, M Hill<sup>1,9</sup>, L Sheffield<sup>1,4,10</sup>, H Slater<sup>1,4,3</sup>, F Tassone<sup>11</sup>, S Younie<sup>5</sup>, S Metcalfe<sup>1,3</sup>

melissa.martyn@mcri.edu.au  
vicki.anderson@rch.org.au  
alison.archibald@mcri.edu.au  
rob.carter@deakin.edu.au  
jcohen@travelclinic.com.au  
martin.delatycki@ghsv.org.au  
susan.donath@mcri.edu.au  
Jon.Emery@uwa.edu.au  
janehalliday.h@mcri.edu.au  
melissa.hill@gosh.nhs.uk  
les.sheffield@genesfx.com  
howard.slater@vcgs.org.au  
ftassone@ucdavis.edu  
sandra.younie@deakin.edu.au  
sylvia.metcalfe@mcri.edu.au

## Affiliations:

1 Murdoch Childrens Research Institute, Melbourne, Victoria, Australia  
2 Royal Children's Hospital, Melbourne, Victoria, Australia  
3 Department of Paediatrics, University of Melbourne, Melbourne, Victoria, Australia  
4 Victorian Clinical Genetics Services, Melbourne, Victoria, Australia  
5 Deakin University, Faculty of Health Melbourne, Victoria, Australia  
6 Fragile X Alliance Clinic; Centre for Developmental Disability Health Victoria, Monash University, Melbourne, Victoria, Australia  
7 Austin Health, Melbourne, Victoria, Australia  
8 School of Primary Aboriginal and Rural Health Care, University of Western Australia; General Practice and Primary Care Academic Centre, University of Melbourne



9 Great Ormond Street Hospital for Children, London, UK  
10 GenesFX Health Pty Ltd, Melbourne, Victoria, Australia  
11 Department of Biochemistry and Molecular Medicine, School of Medicine, University of California  
12 at Davis, Davis, CA, USA; MIND Institute, University of California Davis Medical Center, Sacramento,  
13 CA, USA

~~Primary subject heading: Genetics and Genomics~~

~~Secondary subject heading: public health~~

~~Keywords: Genetics, Public Health, Health policy: health administration and management~~

~~Word Count: 4129~~

## ARTICLE SUMMARY

### Article focus

This article is a protocol of a study that involves offering fragile X syndrome carrier screening to pregnant and non-pregnant women in the general population. We are undertaking a program evaluation approach using mixed methods to collect data about informed decision-making and predictors of test uptake, with a focus on psychosocial measures. We are also undertaking an economic appraisal.

### Key messages

- Carrier screening for fragile X syndrome is the subject of debate because of concerns around education and counselling for this complex condition, and the potential for psychosocial harms.
- This study will inform policy and practice in the area of population carrier screening by examining psychosocial aspects of screening, including informed decision-making; models of screening, through antenatal care or other access points; and health economics of carrier screening for fragile X syndrome.

### Strengths and limitations of this study

- This study seeks to recruit 1000 women in total. This large sample size will give us sufficient power to address the aims of the study.
- Collecting both quantitative and qualitative data will provide a more in-depth picture of screening for fragile X syndrome.
- A limitation of the study is that the data on models of screening may not be applicable to other countries that have different healthcare systems.

## ABSTRACT

### Introduction

Fragile X syndrome (FXS), an X-linked genetic condition, is the leading cause of inherited intellectual and developmental disability. Policy development relating to carrier screening programs for FXS requires input from large scale studies examining not only test uptake but also psychosocial aspects. This study will compare carrier screening in pregnant and non-pregnant populations, examining informed decision-making, psychosocial issues and health economics.

### Methods and Analysis

Pregnant and non-pregnant women are being recruited from general practices and obstetric services. Women receive information about the study either in person or through clinic mail outs. Women are provided pre-test counselling by a genetic counsellor and make a decision about

1  
2  
3 accepting or declining the FXS carrier test in their own time. Data are being collected from two  
4 questionnaires: one completed at the time of making the decision about FXS carrier testing, and a  
5 second one month later. Additional data are gathered through qualitative interviews conducted at  
6 several time-points with a subset of participating women, including all women with a positive test  
7 result, and with staff from clinics involved in recruitment.  
8

9 A minimum sample size of 500 women per group has been calculated to give us 88% power to detect  
10 a 10% difference in test uptake and 87% power to detect a 10% difference in informed choice  
11 between the pregnant and non-pregnant groups.  
12

13  
14 Questionnaire data will be analysed using descriptive statistics and multivariate logistic regression  
15 models. Interview data will be thematically analysed. Willingness-to-pay and cost effectiveness  
16 analyses will also be performed.  
17

18 Recruitment commenced in July 2009 and data collection will be completed by December 2013.  
19

### 20 Ethics and Dissemination

21 Ethics approval has been granted by the Universities of Melbourne and Western Australia and from  
22 recruiting clinics, where required. Results will be reported in peer-reviewed publications,  
23 conference and seminar presentations and via a website [www.fragilexscreening.net.au](http://www.fragilexscreening.net.au). The results  
24 of this study will make a significant contribution to discussions about the wider introduction of  
25 population carrier screening for FXS.  
26  
27

## 28 INTRODUCTION

29  
30 Population based screening programs are available for a number of genetic conditions in the  
31 newborn, prenatal and preconception settings. Several guidelines based on specific criteria exist to  
32 help assess which genetic conditions are suitable for population screening [1, 2]. Fragile X syndrome  
33 (FXS) is an X-linked condition which meets many of the criteria for population screening, as discussed  
34 in Hill et. al [3]. However, in many countries it is still not routine practice to offer carrier screening  
35 for FXS. This is because of concerns about the challenges of screening for this complex condition,  
36 including the need for genetic counselling and education and the potential psychosocial and other  
37 impacts of a positive result, discussed further in Finucane [4].  
38  
39

40 FXS is the most common inherited cause of intellectual and developmental disability. Virtually all  
41 FXS is caused by an expanded CGG trinucleotide repeat in the 5' untranslated region of the *FMR1*  
42 gene which leads to hypermethylation and silencing of the gene [5-9]. Currently, the normal range  
43 of repeats is defined as 6-44, with 45-54 repeats being considered an intermediate 'grey zone' allele  
44 (GZ), 55-200 a premutation (PM) and >200 repeats a full mutation [10, 11]. The repeats in the GZ,  
45 PM and FM ranges can expand when passed from mother to child, although not usually from father  
46 to child [8, 12, 13].  
47  
48

49 The full mutation is associated with intellectual disability, anxiety and features of autism spectrum  
50 and attention/deficit hyperactivity disorders [14]. The clinical presentation varies between  
51 individuals [15] with males usually more severely affected than females. FXS is not curable but  
52 specific treatments exist which may help a number of the physical [16-19] and behavioural  
53 symptoms [20]. Although there is currently no robust evidence to support specific pharmacological  
54 treatments for people with FXS [21], a number of new therapies are being trialled [22-25] which may  
55 lead to improved treatments in the future.  
56  
57  
58  
59  
60

1  
2  
3 In addition to the reproductive risk of having a child with FXS, female FXS PM carriers also have  
4 personal health risks: an increased risk of fragile X associated primary ovarian insufficiency (FXPOI),  
5 with a 20% risk of premature menopause [26-29]; a higher incidence of mental health issues such as  
6 anxiety and depression [4]; a risk of developing fragile X associated tremor/ataxia syndrome (FXTAS),  
7 a late onset neurodegenerative condition, which is more common in male PM carriers than female  
8 [29-31].  
9

10 The reported prevalence of *FMR1* alleles varies. Three large studies examining *FMR1* in anonymous  
11 newborn samples [32-34] found frequencies of the *FMR1* FM in males of 1 in 2633 [33] to 1 in 6,209  
12 [34]. Reported rates of the PM in females in four large studies [12, 34-36] range from 1 in 154 [12]  
13 in Israel to 1 in 549 [34] in Canada, with rates of 1 in 178 [35] and 1 in 209 [36] reported for the USA.  
14 Two large studies reported GZ rates of 1 in 66 [36] to 1 in 85 [34].  
15

16  
17 A number of studies have investigated carrier screening for FXS for women in the general population  
18 [12, 37-46]. Most of these studies focused on uptake of testing, *FMR1* allele sizes and expansion  
19 rates, reproductive choices and pregnancy outcomes. However, genetic population screening  
20 guidelines [1] emphasise the importance of examining the psychosocial aspects of screening,  
21 including informed decision-making. Only our pilot study [43, 47] and one other retrospective study  
22 [39] have measured the psychosocial impacts of screening for FXS and no studies to date have  
23 examined informed decision-making.  
24

25 This study aims to help us better understand the psychosocial aspects of carrier screening for FXS  
26 and will:

- 27 1. Compare informed decision-making by pregnant and non-pregnant women offered carrier  
28 screening for FXS.
- 29 2. Compare uptake and predictors of uptake in pregnant and non-pregnant women offered carrier  
30 screening for FXS.
- 31 3. Undertake an economic appraisal of FXS population carrier screening.  
32  
33

34 Informed decision making is complex and involves many factors [48]. One measure used in  
35 population carrier screening for Down syndrome to estimate informed decision making is the  
36 multidimensional model of informed choice (MMIC) [49], which describes an informed choice as a  
37 decision made with sufficient knowledge that is value consistent. Our study will measure informed  
38 choice using MMIC and will also collect additional information on factors involved in informed  
39 decision making in the two study questionnaires and through qualitative interviews.  
40  
41

42 Our study will also provide information on when to offer population carrier screening for FXS by  
43 comparing screening in non-pregnant and pregnant women. Population carrier screening guidelines  
44 recommend pre-conception carrier screening [1] but such screening is often embedded in antenatal  
45 care, as this provides a convenient (from the perspective of the service provider) point of access,  
46 although may be a more anxious time for women. Research on informed decision-making in  
47 prenatal screening, primarily for Down syndrome, has shown that decisions about testing are often  
48 not informed [50-53]. Our study will be the first to investigate whether rates of informed choice and  
49 uptake differ between pregnant and non-pregnant women.  
50

51 We are testing two hypotheses:

- 52 1. A lower proportion of pregnant women will make an informed decision about carrier screening  
53 compared with non-pregnant women.
- 54 2. Carrier screening for FXS will result in a higher uptake of testing by pregnant women compared  
55 with non-pregnant women.  
56  
57  
58  
59  
60

1  
2  
3 The findings of this study will contribute valuable data to inform debate on policy and approaches to  
4 population carrier screening for FXS.  
5  
6

## 7 **METHODS AND ANALYSIS**

### 8 **Key elements of study design**

#### 9 **Study design**

10  
11 The development and implementation of an effective carrier screening program is a multi-step  
12 process requiring a clear theoretical framework. We have developed a program logic model (see  
13 Figure One) to investigate FXS carrier screening incorporating 5 stages: (1) negotiation and planning;  
14 (2) program development; (3) program implementation; (4) short-term outcomes; and (5) long-term  
15 outcomes. The results of our qualitative needs assessment and pilot study, representing stages 1  
16 and 2, have previously been published [43, 47, 54, 55].  
17  
18  
19

20 The current study covers stages 3 and 4 and uses a mixed-methods approach to data collection to  
21 investigate the short-term outcomes of implementing an FXS carrier screening program. Figure Two  
22 provides an overview of the study design. Specifically, we will investigate test uptake, informed  
23 decision-making, predictors of test uptake, psychosocial outcomes (depression, anxiety, stress,  
24 decisional conflict and decisional regret) and health economic factors (willingness-to-pay).  
25  
26

27 The key elements of the study are that all women will receive a purpose-made brochure and genetic  
28 counselling before making a decision about testing, the test is optional, convenient and non-invasive  
29 and offered at no charge to the participants. Genetic counselling and the field-tested brochure is  
30 included in the protocol, as participants in our pilot study and needs assessment indicated that  
31 having sufficient information and the chance to discuss it is important in making an informed  
32 decision [43, 54]. Offering a test that can be performed at home after sufficient time for decision-  
33 making is important, as we found in our pilot study that having to return to the clinic for an invasive  
34 test was identified as a barrier to testing, although did allow some time for deliberation [43].  
35 Recruiting pregnant and non-pregnant women will allow us to examine if there are any differences  
36 in test uptake, informed choice or psychosocial measures between these groups. Our economic  
37 appraisal will provide important information to guide policy on offering carrier screening for FXS.  
38  
39  
40  
41  
42  
43  
44  
45  
46  
47  
48  
49  
50  
51  
52  
53  
54  
55  
56  
57  
58  
59  
60

Figure One: Program logic model to investigate FXS carrier screening

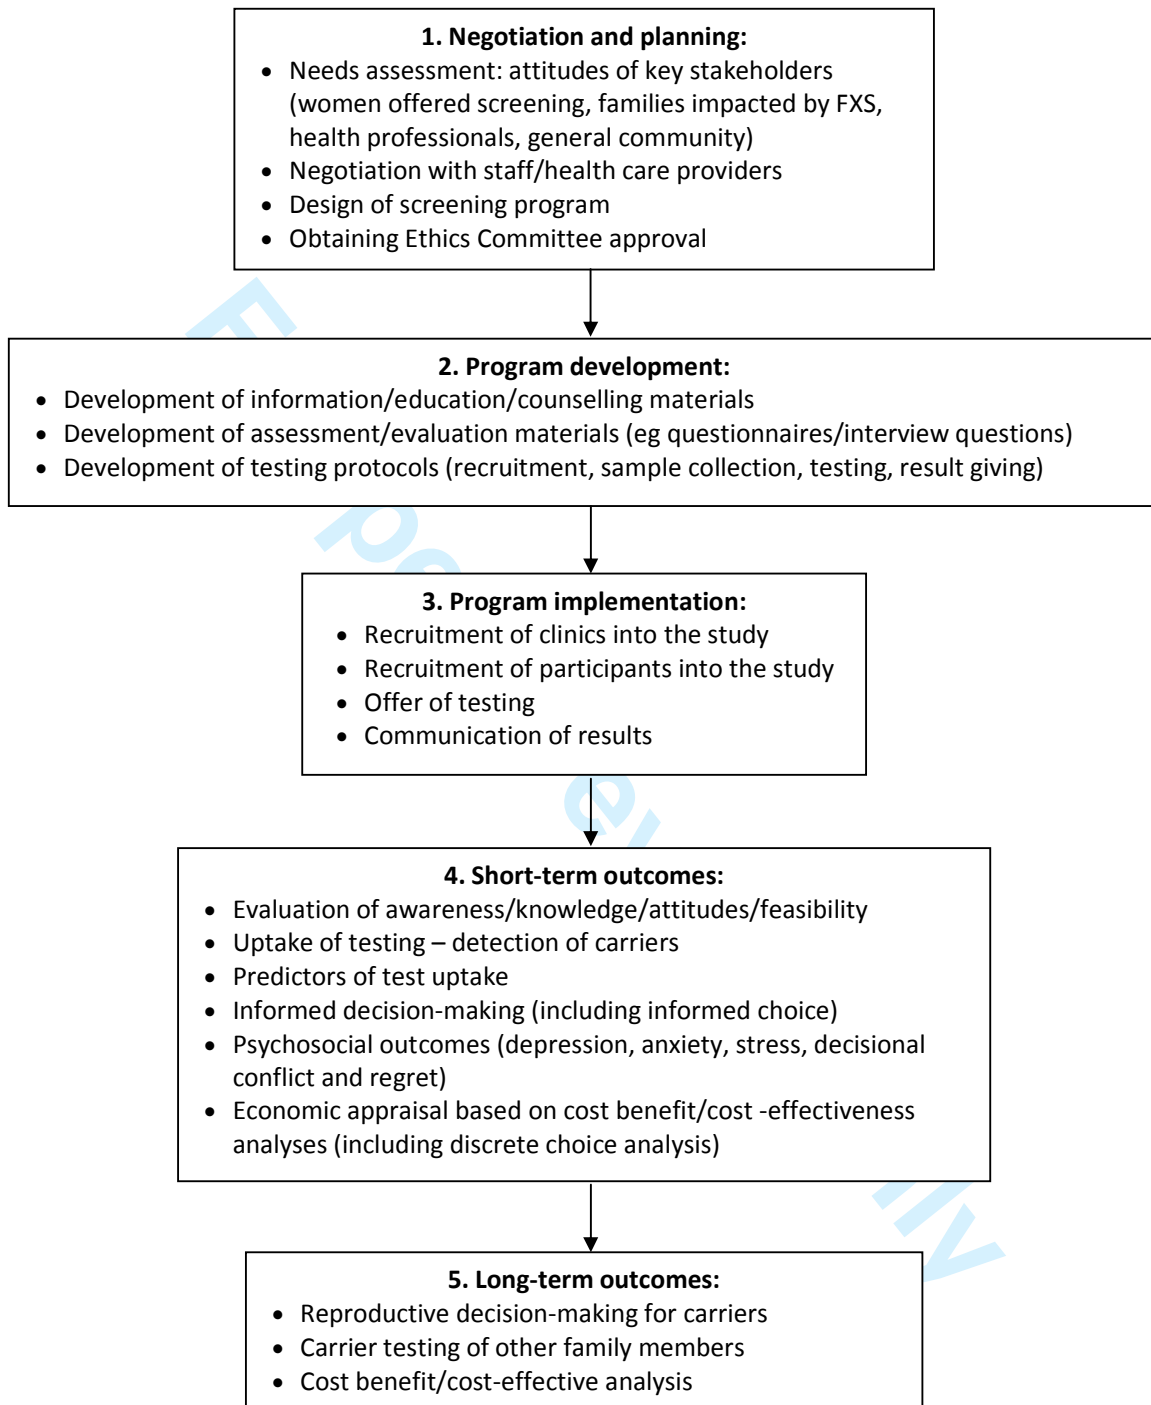

Figure Two: Overview of study protocol

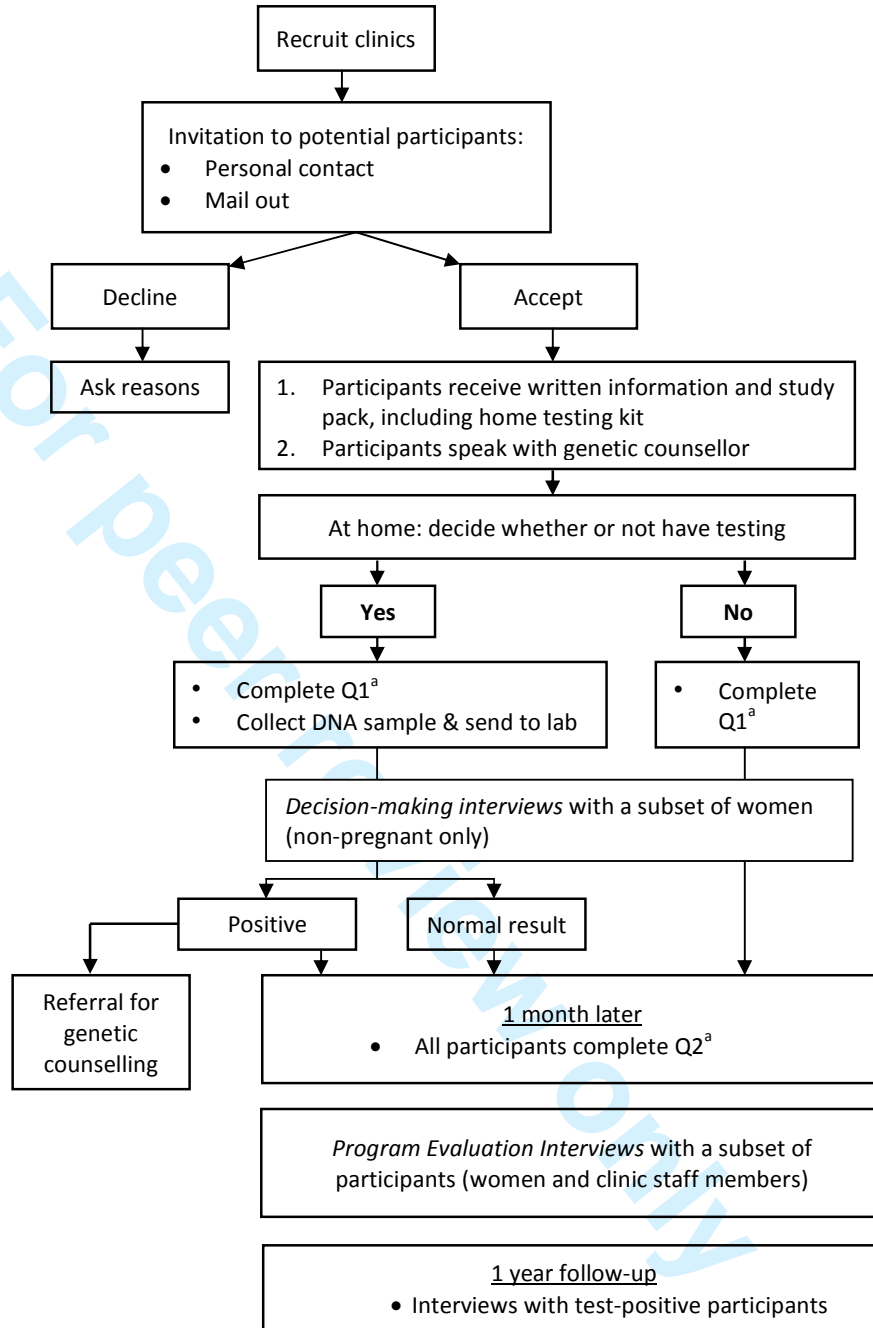

<sup>a</sup> See table 1 for details of measures included in questionnaires 1 and 2

## Settings

The study is being conducted in general practices, public and private obstetric clinics and through private obstetric ultrasound services in Melbourne, Victoria and Perth, Western Australia.

### General Practice

In Australia, women may attend any general practice of their choice, and may attend more than one practice. General practitioners (GPs) are the gatekeepers to access secondary and tertiary care services. About 88% of the Australian population visit a GP at least once a year [56]. Most GP clinics also operate a reminder system for the National Cervical Screening Program, which offers women between the ages of 18 and 69 a cervical (Pap) smear test every two years. Thus most GP clinics have a mail-out system in place to send a reminder letter to their female patients every 2 years. This provides one approach to inviting non-pregnant women into the study and could act as a future service model for population carrier screening.

### Obstetrics

A range of maternity care models exist in Australia but they can be broadly divided into private maternity care, public hospital maternity care and shared local health practitioner/ public hospital maternity care. The first step in accessing maternity care is to attend a GP in early pregnancy to obtain a referral to a private obstetrician or public hospital. The timing of the first appointment with the maternity care provider varies, but in the public hospital system women are often not seen until the second trimester of pregnancy. In 2009, the majority (96.9%) of Australian women gave birth in hospitals and of these, 69.9% (150,157 women) were in the public system and 30.1% (64,771 women) were in the private system [57].

### Obstetric ultrasound – first trimester combined screening

Provision of antenatal screening varies across Australia. In Victoria and Western Australia, first trimester combined screening is available through private pathology laboratories and private ultrasound clinics with some rebate available from the government funded Medicare system, while second trimester screening is state funded. General practitioners or private obstetricians refer women to the private ultrasound clinic for a first trimester nuchal fold thickness scan. In Victoria, about 70% of pregnant women have first trimester combined screening (personal communication, L Bonacquisto, 2013) [58, 59] and so would be expected to attend a private ultrasound practice. In addition to offering testing at initial presentation in primary care, linking FXS carrier screening to first trimester screening is another potential service model.

## Participants

### Enrolling women in the study

Women are eligible to enter the study if they are 18 or over and either not pregnant or up to 12 weeks + 6 days pregnant at the time of recruitment. For non-pregnant women the upper age limit is 70, the age at which participation in the National Cervical Screening Program ends. Women who are unable to speak read and write English are not eligible to enter the study.

Recruitment is occurring in a number of different ways according to the preferences of individual clinics. Non-pregnant women are being recruited from general practice clinics. Women are provided with information about the study either personally (by a researcher, GP, practice nurse or receptionist) or they receive the information through the mail. Study information is not being provided by researchers to women attending general practice clinics who are obviously ill. Pregnant women are being recruited from general practice, private ultrasound and private or public obstetric and ultrasound clinics. In general practice, women are provided with information about the study by the GP when they attend for their pregnancy confirmation appointment. In private ultrasound clinics, study information is provided by clinic reception staff when women attend for their 12 week



1  
2  
3 scan. In private and public obstetric clinics, women are sent the study information in the mail prior  
4 to their first appointment, or are given the information personally by an obstetrician or midwife.  
5 Women who receive information about the study are asked to complete an expression of interest  
6 which is faxed to the research team, either indicating why they do not wish to take part, or providing  
7 their contact details so they can be recruited by a researcher. All recruitment is completed by the  
8 research team and all women speak with a research genetic counsellor.  
9

#### 10 Enrolling clinics in the study

11 General practice clinics located across the metropolitan areas of Melbourne and Perth are being  
12 targeted to try and achieve a geographical spread and a broad representation of different  
13 socioeconomic areas. General practices with established shared-care programs are being identified  
14 using registered shared care provider lists. Professional networks and an in-house database of GPs  
15 and obstetricians who have previously ordered prenatal carrier testing for FXS or cystic fibrosis in  
16 Victoria is also being used to identify practices that might be interested in participating. We  
17 anticipate requiring 5 general practice, 5 private obstetric and 1 obstetric ultrasound clinic to recruit  
18 the 1000 women needed for the study.  
19

20  
21 Members of the project team are providing academic detailing to clinics involved in recruitment.  
22 Academic detailing covers background information on FXS, the aims of the project and what the  
23 study involves for participants. It is emphasised that the aim of the study is not to test as many  
24 women as possible, but rather to understand what factors influence a woman's decision to accept or  
25 decline carrier testing for FXS. Clinics are provided with project resources, including study brochures  
26 and expression of interest forms.  
27

28  
29 Australian GPs are primarily funded by a fee for service system and receive no government funding  
30 (personal or infrastructure) for involvement in research. Private obstetricians and ultrasound clinics  
31 also receive no government funding for involvement in research. All clinics are being offered a small  
32 amount of remuneration to cover their costs of involvement in the study, depending on the number  
33 of women recruited from their clinic.  
34

#### 35 **Data collection**

36 This research protocol will use mixed-methods data collection that includes genetic testing uptake  
37 and outcomes, questionnaires and interviews.  
38

#### 39 Questionnaires

40 The questionnaires use validated and psychometrically robust self-reported scales. Table 1 shows  
41 which scales are used in questionnaire 1 (Q1), completed after making a decision about carrier  
42 testing for FXS, and questionnaire 2 (Q2), completed one month after returning Q1.  
43  
44  
45  
46  
47  
48  
49  
50  
51  
52  
53  
54  
55  
56  
57  
58  
59  
60



Table One: Questionnaire Measures and Scales

| Measure / Scale                                       | Description                                                                                                                                                                                                                                                                                                                                                                                    | Q1 | Q2 |
|-------------------------------------------------------|------------------------------------------------------------------------------------------------------------------------------------------------------------------------------------------------------------------------------------------------------------------------------------------------------------------------------------------------------------------------------------------------|----|----|
| Knowledge                                             | 10 item scale containing questions on FXS (True/False/Unsure). A score of 7 or higher is classified as 'good' knowledge [55]                                                                                                                                                                                                                                                                   | √  | √  |
| Attitudes                                             | 5 item scale (0-4) used to assess a woman's attitude to screening (beneficial/harmful; important/unimportant, bad thing/good thing, pleasant/unpleasant, worrying/not worrying). Dichotomous scale: women are classified as having a positive (11-20) or a negative (0-10) attitude toward screening [49].                                                                                     | √  |    |
| Multi-dimensional Model of Informed Choice (MMIC)     | Defines an informed choice as a decision made with 'good' knowledge which is consistent with a person's values. Incorporates three dimensions: knowledge, attitudes and uptake. Dichotomous scale: 'informed choice' or 'not informed choice' [49].                                                                                                                                            | √  |    |
| Deliberation                                          | 6 item scale measuring the extent to which a decision is deliberated on a 5 point Likert scale (0 = strongly agree – 4 = strongly disagree). Dichotomous scale: responses below the midpoint (11 or under) classified as not deliberated and those at or above the midpoint as deliberated [53].                                                                                               | √  |    |
| Decisional Conflict Scale                             | 16 item scale measuring uncertainty about a course of action on a 5 point Likert scale (0 = strongly agree – 4 = strongly disagree). Mean scores are reported with higher scores indicating higher decisional conflict. Scores range from 0 to 100 with scores over 37.5 associated with decision delay or uncertainty about implementation [60].                                              | √  |    |
| Depression Anxiety Stress Scale, short form (DASS-21) | 21 item scale divided into 3 subscales measuring depression, anxiety and stress. Responses are classified into 5 categories: 1 (normal) to 5 (extremely severe) [61, 62].                                                                                                                                                                                                                      | √  | √  |
| State Trait Anxiety Index, short form (STAI-6)        | 6 item scale measuring state anxiety. The maximum score is 80 with scores 31-49 considered average and scores over 50 indicating elevated state anxiety [59].                                                                                                                                                                                                                                  | √  | √  |
| Health Belief                                         | 16 items measuring the importance of a range of factors which may influence decision-making: perceived benefits; perceived susceptibility; perceived severity; and perceived barriers; in a woman's decision to accept or decline testing for FXS [47, 63]                                                                                                                                     | √  |    |
| Decisional Regret                                     | 5 item scale measuring distress or remorse after a health care decision using a 5 point Likert scale (0-4). Scores range from 0-100 with higher scores indicating a higher level of regret [64].                                                                                                                                                                                               |    | √  |
| Willingness-to-Pay                                    | 2 questions (piloted) that address WTP and gross family income. Income question has 6 income ranges with tick box. WTP question has 11 item income values with tick box and sub-questions that address: i) utility of test (information only or information plus decision-making); and ii) who receives test result (recipient only or recipient plus shared with health share professionals). | √  |    |
| Socio- demographics                                   | Marital status, age, parity, reproductive life-stage, education, occupation, postcode                                                                                                                                                                                                                                                                                                          | √  |    |

### Interviews

To provide in-depth data on participants' experiences, semi-structured qualitative interviews are being conducted with participants at a number of time-points (See Table Two). Interviews are being conducted by two members of the research team with genetic counselling and qualitative research skills.

**Table Two: Overview of Interview Schedule**

| Time-point                                                | Interview type                               | Interview description                                                                                                                                                                      | Selection                                                                                                                                                                                            |
|-----------------------------------------------------------|----------------------------------------------|--------------------------------------------------------------------------------------------------------------------------------------------------------------------------------------------|------------------------------------------------------------------------------------------------------------------------------------------------------------------------------------------------------|
| After return of Q1, before Q2 and result sent (if tested) | Decision-making interviews                   | Knowledge, attitudes, factors influencing decision-making, the decision-making process, and perspectives on decisions                                                                      | Non-pregnant women only; mix of tested and untested women                                                                                                                                            |
| 1 month after return of Q2                                | Program evaluation interviews (women)        | Motivations for participating, factors influencing decision-making, experience of participating in the study including genetic counselling, reflections on decision and views on screening | Mix of tested and untested women from each clinic, including all women with positive test results. Socio-demographic data examined to ensure selected women are representative of the overall sample |
| After completion of recruitment at any given clinic       | Program evaluation interviews (clinic staff) | Attitudes to population carrier screening for FXS, knowledge of FXS, reflections on offering FXS carrier screening at their clinic, and feedback on the study.                             | Mix of staff from each clinic involved in recruitment                                                                                                                                                |
| 1 year after return of Q2                                 | 1 year follow-up                             | Motivations for screening, interpretation of result, perceived value of result, impact of result and reflections on decision                                                               | All women with a test-positive result (i.e. GZ, PM or FM )                                                                                                                                           |

### Data entry quality control

To ensure accuracy of the questionnaire data, every 20<sup>th</sup> questionnaire entered is being checked prior to analysis. The rate of accuracy will be calculated as the number of errors per number of data items entered. To ensure rigour in the qualitative data analysis, transcripts will be independently coded.

### Testing

One of the aims of our study is to evaluate the performance of a new innovative assay specifically designed for population screening for FXS [65]. Therefore, for the first part of the study, we collected DNA from a saliva sample (Oragene- DNA collection kit) and carried out the gold standard

two step diagnostic test [8, 66] in parallel with the innovative screening test. The routine FXS diagnostic test may involve Southern blotting and so can take up to 4 weeks [43]. This is performed by the Victorian Clinical Genetic Service laboratory. Refinements to the innovative screening assay [67] mean that we are now able to collect DNA from cheek brush samples and have results available in one week. This screening assay, marketed by Asuragen, is being performed by Healthscope Pathology.

All women who choose to have carrier testing are being given information about their result based on current best practice. Women with a result in the normal range receive a letter that includes an offer to speak to a genetic counsellor at their local clinical service should they require further information. Women with a test-positive result (GZ, PM or FM) are telephoned and offered face-to-face genetic counselling at their local clinical genetics service. Genetic counselling for women with test-positive results follows usual clinical practice [4, 68]. Any pregnant woman found to have a PM or FM is given her result and, as part of genetic counselling, is offered prenatal diagnostic testing of the fetus, due to the risk of having a child with FXS. An important outcome of receiving an FXS carrier result is that relatives can access genetic testing, which may lead to identification of other carriers and/or the diagnosis of fragile X related disorders in other family members. Genetic testing is discussed as part of the genetic counselling process and family members are offered genetic counselling and testing where appropriate.

### Outcomes

The primary outcomes for the study are test uptake and informed choice. Study participants (denominator) are defined as the number of women recruited into the study who do not actively withdraw at any point. Test uptake is defined as the number of women accepting testing (numerator) divided by the number of study participants and will be reported as a percentage. Informed choice will be reported as the percentage of women in each group (pregnant and non-pregnant, tested and untested) making an informed choice as measured using the Multi-dimensional Measure of Informed Choice (MMIC) [62]. MMIC will be measured in Q1 at the time closest to decision-making. Knowledge, a component of the MMIC, will be measured in Q1 and Q2 and mean knowledge scores will be reported for each time-point.

The study will also examine predictors of test uptake. These multivariate analyses will make use of socio-demographic, family history, health belief and psychosocial items included in Q1.

Psychosocial factors will be examined as secondary measures in this study, including anxiety, depression and stress. These will be administered in both questionnaires to allow them to be measured at the time of decision-making and 1 month later. Decisional conflict will be measured in Q1 and decisional regret in Q2.

State anxiety will be reported as the difference in the mean STAI-6 item short form score of women in each group (pregnant and non-pregnant, tested and untested, normal result versus test positive). Depression, anxiety and stress will be reported as the mean score of women in each group. Decisional conflict and decisional regret will be reported as mean scores.

In the willingness-to-pay (WTP) literature there is keen interest in how WTP dollar values for information may vary in accordance with intended use, who receives the information and capacity-to-pay. Our questions have been designed to address these key issues. Accordingly, WTP data will be reported in a number of ways: i) intended use ('information only' and/or 'decision-making – personal or medical'); ii) by recipients of information ('women only' or 'women plus health care professionals'); iii) for women in the trial as a whole and for each group (pregnant and non-

pregnant, tested and untested, normal result versus test positive); as mean dollar values together with associated ranges around each mean to facilitate sensitivity testing.

#### Sample size

In our pilot study, in which women were required to return on a separate occasion to give a blood sample, test uptake in non-pregnant women was 20%, although 50% indicated they intended to be tested [43]. Based on the relevance to reproductive life-stage, we expect test uptake in the pregnant group to be greater than in the non-pregnant group. Our minimum sample size of 500 women per group will give us 88% power to detect a difference of 10% in test uptake between groups (50% v 40% or 50% vs 60%). We have less information about the likely percentage of women making an informed choice. If the percentage is 50%, with a minimum sample size of 500 per group an unadjusted analysis would have 87% power to detect a difference of 10% (i.e. 50% vs 40% or 50% vs 60%) between groups. If the base rate is greater than or less than 50% we would have >87% power to detect a difference of 10%. The study will therefore be sufficiently powered to exclude anything other than small percentage differences between groups.

#### Proposed analysis

Descriptive statistics will be used to describe the socio-demographic, knowledge, attitudes and psychological characteristics of the sample. To compare uptake of testing by pregnant and non-pregnant women, a multivariate logistic regression model with uptake as the dependent variable, and socio-demographic variables such as age, education and parity, together with pregnant/non-pregnant status and mode of recruitment as the independent variables, will be estimated. This will ensure that a difference in uptake is not due to differences in socio-economic composition of the pregnant and non-pregnant samples. Robust standard errors will be estimated to take into account the possible effect of clustering due to recruitment methods. Odds ratios will be transformed back to percentage differences [69]. A similar analysis will be performed to compare informed choice. To investigate predictors of uptake of testing, a multivariate logistic regression model will be estimated with independent variables including: informed choice, attitudes, number of children, prior awareness of FXS, psychosocial variables, family history of intellectual disability, age and education. Interactions between predictors and pregnancy/non-pregnancy will be examined, and if necessary, separate models will be estimated for pregnant and non-pregnant women.

Interviews are transcribed verbatim and NVivo 10 (QSR International, Australia) is being used to manage the data and facilitate coding. Coding is being done by at least two independent researchers to provide rigour of analysis. The decision-making interviews are being examined using content and thematic analysis. These interviews occur between the return of Q1 and the issuing of results (for tested women) and Q2. As such they involve only non-pregnant women, as we were concerned that an interview at this time before receiving a result, or needing to delay sending out the result prior to the interview, could be distressing for pregnant women at a time when they might be vulnerable. Data from the post-Q2 interviews are being analysed using directed content analysis [70]. The coding framework has been developed using data from the needs assessment phase of the study [43, 47, 54]. As little prior research has explored the experiences of women identified as carrying GZ, PM or FM alleles through population-based carrier screening, or the experiences of staff in clinics offering population carrier screening, the interviews will be analysed thematically. This will involve an iterative process where data are coded, compared, contrasted and refined to generate emergent themes [71] using an approach we have described previously [54].

The economic analysis is matched to the stages of FXS carrier screening described in our program logic model (Figure One). At this stage the analysis is concerned with examining stage 3 (program implementation) and stage 4 (short-term outcomes). Placing a dollar value on the health and non-health outcomes of FXS screening is complex. The immediate result of FXS screening is information.

1  
2  
3 That information might be about a risk to a fetus the women is carrying, implications for the  
4 women's future health, or implications for the woman's future reproductive health and reproductive  
5 choices. It is for this reason that we have started with willingness-to-pay (WTP) methods to explore  
6 the value that individuals place on the information provided. The WTP data will be analysed in  
7 accordance with the intervention design and policy issues set out above. The WTP data will also be  
8 analysed to see if there is an association between the dollar values and preparedness to undergo  
9 testing. Similarly, to the extent feasible, the relationship between socio-demographic variables and  
10 WTP will be analysed to see if these variables impact on WTP.  
11

12  
13 Longer-term economic modelling using a surrogate is planned for Stage 5. We aim to go on to  
14 record the actions that the women undertake as a result of their test results and the incidence of  
15 births of babies with FXS to women in the study, discussion of test results with family and  
16 identification of carriers/affected individuals with cascade testing. This will facilitate full economic  
17 appraisal using a range of methods, including discrete choice experiments (DCE). DCE has  
18 applicability to this field because non-health outcomes and process attributes are also important,  
19 and DCE is a logical extension to the WTP for inclusion in Stage 5.  
20

## 21 22 **ETHICS AND DISSEMINATION**

### 23 24 **Ethics**

25 Ethics approval to conduct this study has been granted by the Human Research Ethics Committees of  
26 the Universities of Melbourne (HREC 0830733) and Western Australia (RA/4/1/4028). Additionally,  
27 approval has been granted by the ethics committees of the following recruitment sites: Family  
28 Planning Victoria (09/2); Women's and Newborn Health Service and Charles Gardiner Hospital – King  
29 Edward Memorial Hospital (1925/EW); Swan Kalamunda Health Service (2012-160). This project is  
30 being carried out according to the National Statement on Ethical Conduct in Human Research (2007)  
31 and the Australian Code for the Responsible Conduct of Research (2007) produced by the National  
32 Health and Medical Research Council of Australia. A plain language statement is provided to all  
33 women and to clinics and health professionals involved in recruiting women for the study and a  
34 signed consent form is obtained from all participants at the time of recruitment.  
35  
36

### 37 38 **Steering group and advisory committee**

39 This study has a designated research team and an advisory group. The advisory group includes  
40 representation from the Victorian Department of Health, the Fragile X Association of Australia and  
41 clinicians involved in the study. This group meets annually. The research team includes expertise in  
42 population health, genetics, primary care, epidemiology, FXS, health economics, pathology and  
43 psychology, with the full team meeting quarterly.  
44

### 45 46 **Dissemination**

47 This study will be the first of its kind worldwide to address informed decision-making in carrier  
48 screening for FXS and to compare screening in pregnant and non-pregnant women. It will inform  
49 appropriate clinic service models for offering FXS screening and will provide important exploratory  
50 health economic data. We expect to publish one main trial outcome paper and a number of  
51 additional papers exploring aspects of the data in more detail. We will also present our findings at a  
52 number of international conferences. A report outlining the main findings of the study will also be  
53 made available on the study website [www.fragilexscreening.net.au](http://www.fragilexscreening.net.au) on completion. The findings of  
54 this study will inform policy development about when and how to offer population carrier screening  
55 for FXS.  
56

### 57 58 **Funding statement**

1  
2  
3 This work was supported by a National Health and Medical Research Council project grant [607320]  
4 and the Victorian Government's Operational Infrastructure Support Program. Funding was also  
5 received from the Shepherd Foundation, Helen Macpherson Smith Trust, the Apex Foundation, the  
6 Fragile X Alliance Inc, and theme funding from the Murdoch Childrens Research Institute.  
7  
8

## 9 REFERENCES

- 10  
11  
12 1. Godard B, Leo ten K, Evers-Kiebooms G, Aymé S. Population genetic screening programmes:  
13 principles, techniques, practices, and policies. *Eur J Hum Genet* 2003;**11**:S49-S87.  
14  
15
- 16  
17 2. Teutsch SM, Bradley LA, Palomaki GE, et al. The Evaluation of Genomic Applications in Practice  
18 and Prevention (EGAPP) Initiative: methods of the EGAPP Working Group. *Genet Med*  
19  
20  
21 2009;**11**(1):3-14.  
22  
23
- 24  
25 3. Hill MK, Archibald AD, Cohen J, Metcalfe SA. A systematic review of population screening for  
26 fragile X syndrome. *Genet Med* 2010;**12**(7):396-410.  
27
- 28  
29 4. Finucane B, Abrams L, Cronister A, Archibald AD, Bennett RL, McConkie-Rosell A. Genetic  
30 counseling and testing for FMR1 gene mutations: practice guidelines of the national society  
31 of genetic counselors. *J Genet Couns* 2012;**21**(6):752-60.  
32  
33
- 34  
35 5. Pieretti M, Zhang FP, Fu YH, et al. Absence of expression of the FMR-1 gene in fragile X syndrome.  
36  
37 *Cell* 1991;**66**(4):817-22.  
38
- 39  
40 6. Verkerk AJ, Pieretti M, Sutcliffe JS, et al. Identification of a gene (FMR-1) containing a CGG repeat  
41 coincident with a breakpoint cluster region exhibiting length variation in fragile X syndrome.  
42  
43 *Cell* 1991;**65**(5):905-14.  
44
- 45  
46 7. Bell MV, Hirst MC, Nakahori Y, et al. Physical mapping across the fragile X: hypermethylation and  
47 clinical expression of the fragile X syndrome. *Cell* 1991;**64**(4):861-6.  
48
- 49  
50 8. Fu YH, Kuhl DP, Pizzuti A, et al. Variation of the CGG repeat at the fragile X site results in genetic  
51 instability: resolution of the Sherman paradox. *Cell* 1991;**67**(6):1047-58.  
52  
53
- 54  
55 9. Yu S, Mulley J, Loesch D, et al. Fragile-X syndrome: unique genetics of the heritable unstable  
56 element. *Am J Hum Genet* 1992;**50**(5):968-80.  
57  
58  
59  
60



10. HGSA. Best Practice Fragile X Testing and Analysis Guidelines for Australasian Laboratories, 2012.
11. Kronquist KE, Sherman SL, Spector EB. Clinical significance of tri-nucleotide repeats in Fragile X testing: a clarification of American College of Medical Genetics guidelines. *Genet Med* 2008;**10**(11):845-7.
12. Berkenstadt M, Ries-Levavi L, Cuckle H, Peleg L, Barkai G. Preconceptional and prenatal screening for fragile X syndrome: experience with 40,000 tests. *Prenat Diagn* 2007;**27**(11):991-4.
13. Nolin SL, Lewis FA, 3rd, Ye LL, et al. Familial transmission of the FMR1 CGG repeat. *Am J Hum Genet* 1996;**59**(6):1252-61.
14. Cornish K, Turk J, Hagerman R. The fragile X continuum: new advances and perspectives. *J Intellect Disabil Res* 2008;**52**(Pt 6):469-82.
15. Hagerman R, Hagerman P. Fragile X syndrome: diagnosis, treatment, and research. Baltimore: Johns Hopkins University Press, 2002.
16. Davids JR, Hagerman RJ, Eilert RE. Orthopaedic aspects of fragile-X syndrome. *J Bone Joint Surg Am* 1990;**72**(6):889-96.
17. Hagerman RJ, Altshul-Stark D, McBogg P. Recurrent otitis media in the fragile X syndrome. *Am J Dis Child* 1987;**141**(2):184-7.
18. Hatton DD, Buckley E, Lachiewicz A, Roberts J. Ocular status of boys with fragile X syndrome: a prospective study. *J AAPOS* 1998;**2**(5):298-302.
19. Wirojatanan J, Jacquemont S, Diaz R, et al. The efficacy of melatonin for sleep problems in children with autism, fragile X syndrome, or autism and fragile X syndrome. *J Clin Sleep Med* 2009;**5**(2):145-50.
20. Hagerman RJ, Berry-Kravis E, Kaufmann WE, et al. Advances in the treatment of fragile X syndrome. *Pediatrics* 2009;**123**(1):378-90.
21. Rueda JR, Ballesteros J, Tejada MI. Systematic review of pharmacological treatments in fragile X syndrome. *BMC Neurol* 2009;**9**:53.

- 1  
2  
3 22. Berry-Kravis EM, Hessler D, Rathmell B, et al. Effects of STX209 (arbaclofen) on neurobehavioral  
4 function in children and adults with fragile X syndrome: a randomized, controlled, phase 2  
5 trial. *Sci Transl Med* 2012;**4**(152):152ra27.  
6  
7  
8  
9 23. Jacquemont S, Curie A, des Portes V, et al. Epigenetic modification of the FMR1 gene in fragile X  
10 syndrome is associated with differential response to the mGluR5 antagonist AFQ056. *Sci*  
11 *Transl Med* 2011;**3**(64):64ra1.  
12  
13  
14 24. Paribello C, Tao L, Folino A, et al. Open-label add-on treatment trial of minocycline in fragile X  
15 syndrome. *BMC Neurol* 2010;**10**:91.  
16  
17  
18 25. Kesler SR, Lightbody AA, Reiss AL. Cholinergic dysfunction in fragile X syndrome and potential  
19 intervention: a preliminary 1H MRS study. *Am J Med Genet* 2009;**149A**(3):403-7.  
20  
21  
22 26. Schwartz CE, Dean J, Howard-Peebles PN, et al. Obstetrical and gynecological complications in  
23 fragile X carriers: A multicenter study. *Am J Med Genet* 1994;**51**(4):400-02.  
24  
25  
26 27. Allingham-Hawkins DJ, Babul-Hirji R, Chitayat D, et al. Fragile X premutation is a significant risk  
27 factor for premature ovarian failure: the International Collaborative POF in Fragile X study--  
28 preliminary data. *Am J Med Genet* 1999;**83**(4):322-5.  
29  
30  
31 28. Sherman SL. Premature ovarian failure in the fragile X syndrome. *Am J Med Genet*  
32 2000;**97**(3):189-94.  
33  
34  
35 29. Rodriguez-Revenga L, Madrigal I, Pagonabarraga J, et al. Penetrance of FMR1 premutation  
36 associated pathologies in fragile X syndrome families. *Eur J Hum Genet* 2009;**17**(10):1359-62.  
37  
38  
39 30. Hagerman RJ, Leehey M, Heinrichs W, et al. Intention tremor, parkinsonism, and generalized  
40 brain atrophy in male carriers of fragile X. *Neurology* 2001;**57**(1):127-30.  
41  
42  
43 31. Jacquemont S, Hagerman RJ, Leehey M, et al. Fragile X premutation tremor/ataxia syndrome:  
44 molecular, clinical, and neuroimaging correlates. *Am J Hum Genet* 2003;**72**(4):869-78.  
45  
46  
47 32. Coffee B, Keith K, Albizua I, et al. Incidence of fragile X syndrome by newborn screening for  
48 methylated FMR1 DNA. *Am J Hum Genet* 2009;**85**(4):503-14.  
49  
50  
51  
52  
53  
54  
55  
56  
57  
58  
59  
60



- 1  
2  
3 33. Fernandez-Carvajal I, Walichiewicz P, Xiaosen X, Pan R, Hagerman PJ, Tassone F. Screening for  
4 expanded alleles of the FMR1 gene in blood spots from newborn males in a Spanish  
5 population. *J Mol Diagn* 2009;**11**(4):324-9.  
6  
7  
8  
9  
10 34. Levesque S, Dombrowski C, Morel ML, et al. Screening and instability of FMR1 alleles in a  
11 prospective sample of 24,449 mother-newborn pairs from the general population. *Clin*  
12 *Genet* 2009;**76**(6):511-23.  
13  
14  
15  
16 35. Hantash FM, Goos DM, Crossley B, et al. FMR1 premutation carrier frequency in patients  
17 undergoing routine population-based carrier screening: insights into the prevalence of  
18 fragile X syndrome, fragile X-associated tremor/ataxia syndrome, and fragile X-associated  
19 primary ovarian insufficiency in the United States. *Genet Med* 2011;**13**(1):39-45.  
20  
21  
22  
23  
24 36. Tassone F, Long KP, Tong TH, et al. FMR1 CGG allele size and prevalence ascertained through  
25 newborn screening in the United States. *Genome Med* 2012;**4**(12):100.  
26  
27  
28  
29 37. Spence WC, Black SH, Fallon L, et al. Molecular fragile X screening in normal populations. *Am J*  
30 *Med Genet* 1996;**64**(1):181-3.  
31  
32  
33 38. Pessa R, Berkenstadt M, Cuckle H, et al. Screening for fragile X syndrome in women of  
34 reproductive age. *Prenat Diagn* 2000;**20**(8):611-4.  
35  
36  
37  
38 39. Ryyanen M, Heinonen S, Makkonen M, Kajanoja E, Mannermaa A, Pertti K. Feasibility and  
39 acceptance of screening for fragile X mutations in low-risk pregnancies. *Eur J Hum Genet*  
40 1999;**7**(2):212-6.  
41  
42  
43  
44 40. Toledano-Alhadeff H, Basel-Vanagaite L, Magal N, et al. Fragile-X carrier screening and the  
45 prevalence of premutation and full-mutation carriers in Israel. *Am J Hum Genet*  
46 2001;**69**(2):351-60.  
47  
48  
49  
50 41. Cronister A, DiMaio M, Mahoney MJ, Donnenfeld AE, Hallam S. Fragile X syndrome carrier  
51 screening in the prenatal genetic counseling setting. *Genet Med* 2005;**7**(4):246-50.  
52  
53  
54  
55 42. Anido A, Carlson LM, Taft L, Sherman SL. Women's attitudes toward testing for fragile X carrier  
56 status: a qualitative analysis. *J Genet Couns* 2005;**14**(4):295-306.  
57  
58  
59  
60

- 1  
2  
3 43. Metcalfe S, Jacques A, Archibald A, et al. A model for offering carrier screening for fragile X  
4  
5 syndrome to nonpregnant women: results from a pilot study. *Genet Med* 2008;**10**(7):525-35.  
6  
7 44. Geva E, Yaron Y, Shomrat R, et al. The risk of fragile X premutation expansion is lower in carriers  
8  
9 detected by general prenatal screening than in carriers from known fragile X families. *Genet*  
10  
11 *Test* 2000;**4**(3):289-92.  
12  
13 45. Fanos JH, Spangner KA, Musci TJ. Attitudes toward prenatal screening and testing for Fragile X.  
14  
15 *Genet Med* 2006;**8**(2):129-33.  
16  
17 46. Musci TJ, Caughey AB. Cost-effectiveness analysis of prenatal population-based fragile X carrier  
18  
19 screening. *Am J Obstet Gynecol* 2005;**192**(6):1905-12.  
20  
21 47. Archibald AD, Jaques AM, Wake S, Collins VR, Cohen J, Metcalfe SA. "It's something I need to  
22  
23 consider": Decisions about carrier screening for fragile X syndrome in a population of non-  
24  
25 pregnant women. *Am J Med Genet A* 2009;**149A**(12):2731-8.  
26  
27 48. Bekker H, Thornton JG, Airey CM, et al. Informed decision making: an annotated bibliography  
28  
29 and systematic review. *Health Technol Assess* 1999;**3**(1):1-156.  
30  
31 49. Marteau TM, Dormandy E, Michie S. A measure of informed choice. *Health Expect* 2001;**4**(2):99-  
32  
33 108.  
34  
35 50. Jaques AM, Halliday JL, Bell RJ. Do women know that prenatal testing detects fetuses with Down  
36  
37 syndrome? *J Obstet Gynaecol* 2004;**24**(6):647-51.  
38  
39 51. Jaques AM, Sheffield LJ, Halliday JL. Informed choice in women attending private clinics to  
40  
41 undergo first-trimester screening for Down syndrome. *Prenat Diagn* 2005;**25**(8):656-64.  
42  
43 52. Rowe HJ, Fisher JR, Quinlivan JA. Are pregnant Australian women well informed about prenatal  
44  
45 genetic screening? A systematic investigation using the Multidimensional Measure of  
46  
47 Informed Choice. *Aust N Z J Obstet Gynaecol* 2006;**46**(5):433-9.  
48  
49 53. van den Berg M, Timmermans DR, ten Kate LP, van Vugt JM, van der Wal G. Informed decision-  
50  
51 making in the context of prenatal screening. *Patient Educ Couns* 2006;**63**(1-2):110-7.  
52  
53  
54  
55  
56  
57  
58  
59  
60

- 1  
2  
3 54. Archibald AD, Hickerton CL, Jaques AM, Wake S, Cohen J, Metcalfe SA. "It's about having the  
4  
5 choice": stakeholder perceptions of population-based genetic carrier screening for fragile X  
6  
7 syndrome. *Am J Med Genet A* 2013;**161A**(1):48-58.  
8  
9  
10 55. Ames AG, Jaques A, Ukoumunne OC, et al. Development of a fragile X syndrome (FXS) knowledge  
11  
12 scale: towards a modified multidimensional measure of informed choice for FXS population  
13  
14 carrier screening. *Health Expect* Published Online First: 2012/10/17. doi:10.1111/hex.12009  
15  
16 56. Britt H, Miller G, editors. General practice in Australia, health priorities and policies 1998 to 2008.  
17  
18 Canberra: Australian Institute of Health and Welfare and the University of Sydney, 2009.  
19  
20 57. Li Z, McNally L, Hilder L, EA S. Australia's mothers and babies 2009. Perinatal statistics series no.  
21  
22 25. Cat. no. PER 52. Sydney: Australian Institute of Health and Welfare National Perinatal  
23  
24 Epidemiology and Statistics Unit, 2011.  
25  
26 58. Breheny N, O'Leary P, Dickinson J, et al. Statewide evaluation of first trimester screening for  
27  
28 Down syndrome and other fetal anomalies in Western Australia. *Genomics Occasional Paper*  
29  
30 5.: Prenatal Diagnosis Committee Department of Health Western Australia, 2005.  
31  
32 59. Marteau TM, Bekker H. The development of a six-item short-form of the state scale of the  
33  
34 Spielberger State-Trait Anxiety Inventory (STAI). *Br J Clin Psychol* 1992;**31 ( Pt 3)**:301-6.  
35  
36 60. O'Connor A. User Manual – Decisional Conflict Scale (16 item statement format). Ottawa: Ottawa  
37  
38 Hospital Research Institute;  
39  
40 doi:[http://decisionaid.ohri.ca/docs/develop/User\\_Manuals/UM\\_Decisional\\_Conflict.pdf](http://decisionaid.ohri.ca/docs/develop/User_Manuals/UM_Decisional_Conflict.pdf)  
41  
42  
43 61. Crawford JR, Henry JD. The Depression Anxiety Stress Scales (DASS): normative data and latent  
44  
45 structure in a large non-clinical sample. *Br J Clin Psychol* 2003;**42**(Pt 2):111-31.  
46  
47 62. Lovibond SH, Lovibond PF. Manual for the Depression Anxiety Stress Scales (2nd. Ed.) Sydney:  
48  
49 Psychology Foundation, 1995.  
50  
51 63. Janz NK, Becker MH. The Health Belief Model: a decade later. *Health Educ Q* 1984;**11**(1):1-47.  
52  
53 64. O'Connor A. User Manual – Decision Regret Scale. Ottawa: Ottawa Hospital Research Institute  
54  
55 doi: [http://decisionaid.ohri.ca/docs/develop/User\\_Manuals/UM\\_Regret\\_Scale.pdf](http://decisionaid.ohri.ca/docs/develop/User_Manuals/UM_Regret_Scale.pdf)  
56  
57  
58  
59  
60

- 1  
2  
3 65. Tassone F, Pan R, Amiri K, Taylor AK, Hagerman PJ. A rapid polymerase chain reaction-based  
4  
5 screening method for identification of all expanded alleles of the fragile X (FMR1) gene in  
6  
7 newborn and high-risk populations. *J Mol Diagn* 2008;**10**(1):43-9.  
8  
9  
10 66. Khaniani MS, Kalitsis P, Burgess T, Slater HR. An improved Diagnostic PCR Assay for identification  
11  
12 of Cryptic Heterozygosity for CGG Triplet Repeat Alleles in the Fragile X Gene (FMR1). *Mol*  
13  
14 *Cytogenet* 2008;**1**(1):5.  
15  
16 67. Chen L, Hadd A, Sah S, et al. An information-rich CGG repeat primed PCR that detects the full  
17  
18 range of fragile X expanded alleles and minimizes the need for southern blot analysis. *J Mol*  
19  
20 *Diagn* 2010;**12**(5):589-600.  
21  
22 68. McConkie-Rosell A, Finucane B, Cronister A, Abrams L, Bennett RL, Pettersen BJ. Genetic  
23  
24 counseling for fragile x syndrome: updated recommendations of the national society of  
25  
26 genetic counselors. *J Genet Couns* 2005;**14**(4):249-70.  
27  
28  
29 69. Localio AR, Margolis DJ, Berlin JA. Relative risks and confidence intervals were easily computed  
30  
31 indirectly from multivariable logistic regression. *J Clin Epidemiol* 2007;**60**(9):874-82.  
32  
33 70. Hsieh HF, Shannon SE. Three approaches to qualitative content analysis. *Qual Health Res*  
34  
35 2005;**15**(9):1277-88.  
36  
37  
38 71. Charmaz K. *Constructing grounded theory: A practical guide through qualitative analysis*. Los  
39  
40 Angeles: Sage, 2006.  
41  
42  
43  
44  
45  
46  
47  
48  
49  
50  
51  
52  
53  
54  
55  
56  
57  
58  
59  
60
